# Supplementary material for: SAV742, a Novel AraC-Family Regulator from Streptomyces avermitilis, Controls Avermectin Biosynthesis, Cell Growth and Development
Source: PubMed Central journal article supplement (PMC5107987; doi:10.1038/srep36915), 2016-11-14
Supplement: srep36915-s1.pdf [file srep36915-s1.pdf]

## **Supplementary information**

# **SAV742, a Novel AraC-Family Regulator from *Streptomyces avermitilis*, Controls Avermectin Biosynthesis, Cell Growth and Development**

**Di Sun, Jianya Zhu, Zhi Chen, Jilun Li, Ying Wen\***

State Key Laboratory of Agrobiotechnology and MOA Key Laboratory of Soil Microbiology, College of Biological Sciences, China Agricultural University, Beijing 100193, China

\* Author for correspondence. E-mail: wen@cau.edu.cn. Phone: +86-10-62732715.

### **Supplementary Figures:**

Figure S1. Strategy for in-frame deletion of *sav\_742* in *S. avermitilis*.

Figure S2. Determination of the *sav\_742* TSS by 5'-RACE.

Figure S3. SAV742 directly activates *sig8* transcription.

Figure S4. Comparison of the predicted secondary structure of the DNA-binding domain of SAV742 (blue) with that of *S. griseus* AdpA (orange).

### **Supplementary Tables:**

Table S1. Putative targets of SAV742.

Table S2. Strains and plasmids used in this study.

Table S3. Primers used in this study.

### **References**

**Figure S1**

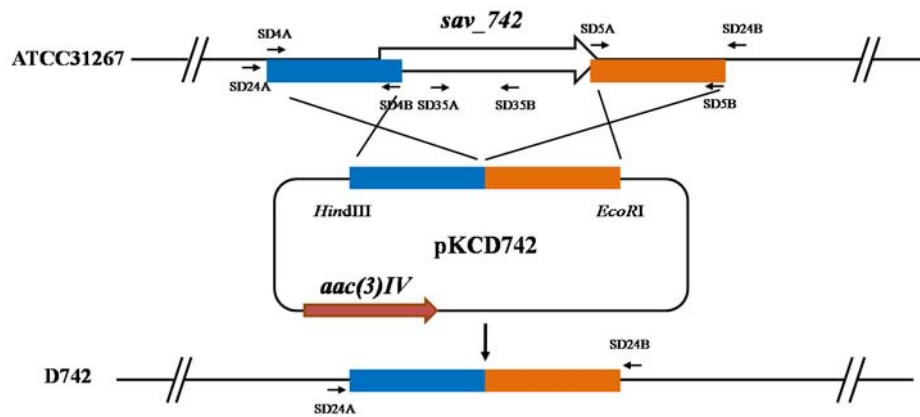

**Figure S1. Strategy for in-frame deletion of *sav\_742* in *S. avermitilis*.** Thick arrow: gene and orientation of transcription. Short arrow: primer position. Block: homologous exchange fragment for *sav\_742* deletion.

Figure S2

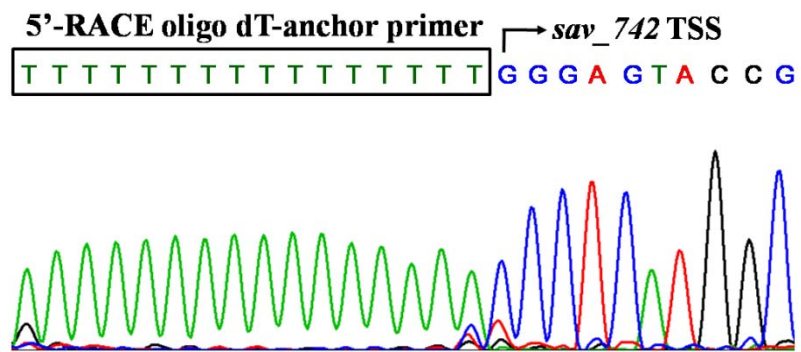

Figure S2. Determination of the *sav\_742* TSS by 5'-RACE. Boxed area: sequence of oligo dT-anchor primer. Bent arrow: base of TSS.

**Figure S3**

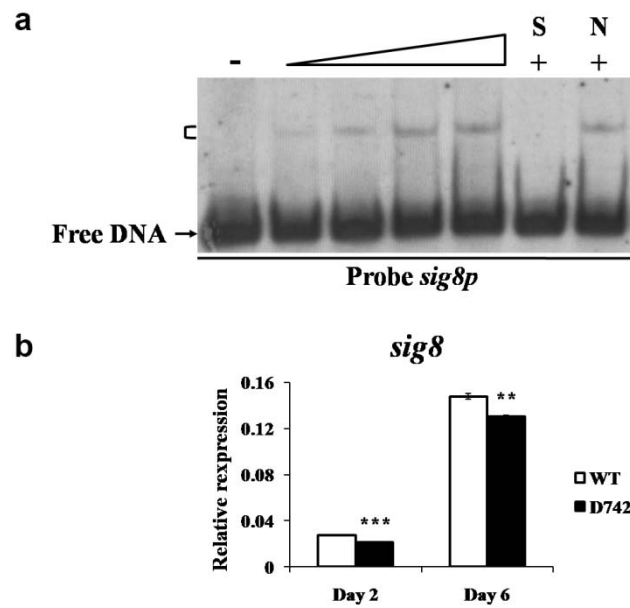

**Figure S3. SAV742 directly activates *sig8* transcription.** (a) EMSAs of His<sub>6</sub>-SAV742 interaction with *sig8* promoter region. Procedures and notations same as for Fig. 2a. (b) qRT-PCR analysis of *sig8* transcription level in WT and D742 grown in FM-I for 2 or 6 days. Relative values were obtained using 16S *rRNA* as internal reference. \*\*, P < 0.01; \*\*\*, P < 0.001 (Student's t-test).

**Figure S4**

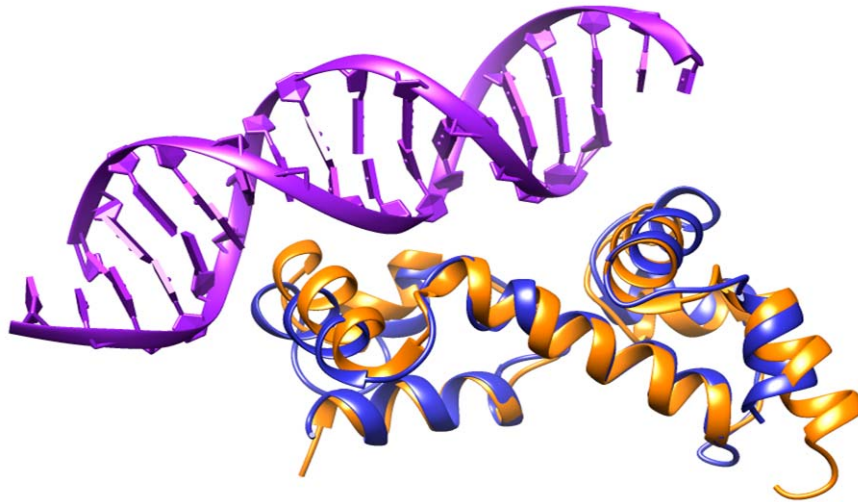

**Figure S4. Comparison of the predicted secondary structure of the DNA-binding domain of SAV742 (blue) with that of *S. griseus* AdpA (orange).** Purple color: DNA. The protein structure of the SAV742 DNA-binding domain was modeled using the SWISS-MODEL Workplace (<https://swissmodel.expasy.org/>). The Chimera program (v1.11rc) was used to align the SAV742 model with the structure of AdpA DNA-binding domain (Protein Data Bank ID: 3w6v).

**Table S1. Putative targets of SAV742.**

| #                                | Accession number | Gene         | Putative target sites                                                                                                                        | Function                                         |
|----------------------------------|------------------|--------------|----------------------------------------------------------------------------------------------------------------------------------------------|--------------------------------------------------|
| <b>Regulatory function (350)</b> |                  |              |                                                                                                                                              |                                                  |
| 1                                | <i>sav_1934</i>  | <i>alkA1</i> | <u>GCCGCCACGCCGCC</u><br><u>GCCGCGGCCGCC</u><br><u>GCCGCCCTCGCC</u><br><u>GCCGCGGCCCGTGGAGGCCGGC</u><br><u>ACCGCCGGGGGCGGGGCTGGC</u>         | putative ADA-like regulatory protein             |
| 2                                | <i>sav_2085</i>  | <i>alkA2</i> | <u>GCCGCGGCGCGGGGCTGGC</u>                                                                                                                   | putative ADA-like regulatory protein             |
| 3                                | <i>sav_7499</i>  | <i>amfR</i>  | <u>GCCGCGGAATCGGCACCGGC</u><br><u>ACCGAGAACCCGGC</u><br><u>GCCGCCCGCC</u>                                                                    | putative two-component system response regulator |
| 4                                | <i>sav_3705</i>  | <i>avaR1</i> | <u>ACCGCCGAAGACAGGC</u>                                                                                                                      | putative gamma-butyrolactone receptor protein    |
| 5                                | <i>sav_3702</i>  | <i>avaR2</i> | <u>GCCGCGCGGTACGGCTCGGC</u><br><u>ACCGCGTCGGC</u><br><u>GCCGCCCGCGTGCCCGCTGCCGCC</u>                                                         | putative TetR-family transcriptional regulator   |
| 6                                | <i>sav_1199</i>  | <i>bdpC</i>  | <u>GCCGCCCGGGCCCTTCCCGGC</u>                                                                                                                 | putative AraC-family transcriptional regulator   |
| 7                                | <i>sav_659</i>   | <i>bdpD</i>  | <u>GCCGCCCTTCGTGACCGTTGCC</u><br><u>GCCGACCCGCC</u>                                                                                          | putative AraC-family transcriptional regulator   |
| 8                                | <i>sav_1667</i>  | <i>bdpL</i>  | <u>GCCGCGCGGCGCTGCC</u>                                                                                                                      | putative AraC-family transcriptional regulator   |
| 9                                | <i>sav_1371</i>  | <i>bdpM</i>  | <u>ACCGCGACTCCTGTGAGCTGCC</u>                                                                                                                | putative AraC-family transcriptional regulator   |
| 10                               | <i>sav_4130</i>  | <i>bldC</i>  | <u>ACCGACTCGACTCGCGTCCGCC</u><br><u>ACCGATGGAATTGCC</u><br><u>GCCGCGTAGGC</u>                                                                | putative MerR-family transcriptional regulator   |
| 11                               | <i>sav_4614</i>  | <i>bldG</i>  | <u>ACCGCCCACAGCGCCGCCGCC</u>                                                                                                                 | anti-sigma factor antagonist                     |
| 12                               | <i>sav_5332</i>  | <i>copZ</i>  | <u>ACCGCCACCGCC</u>                                                                                                                          | putative copper chaperone                        |
| 13                               | <i>sav_1252</i>  | <i>cvnA1</i> | <u>ACCGATCGCC</u><br><u>ACCGCCCCAGTGTTTCGCTGCC</u><br><u>ACCGCGGGTGTCCGGGTCGCC</u><br><u>GCCGATCTTGCCACCGGC</u><br><u>ACCGATGACGCGTCCGCC</u> | putative sensor-like histidine kinase            |
| 14                               | <i>sav_1582</i>  | <i>cvnA2</i> | <u>GCCGCCCGGGTCCCTCGCC</u>                                                                                                                   | putative sensor-like histidine kinase            |
| 15                               | <i>sav_1633</i>  | <i>cvnA3</i> | <u>GCCGAGGAGCACAGTGCTCCTCGGC</u><br><u>ACCGCACATGATGCGTTGCC</u><br><u>GCCGAGGAGCACTGTGCTCCTCGGC</u><br><u>ACCGATAACCCCGCC</u>                | putative sensor-like histidine kinase            |

|    |                 |               |                                                                                                                                    |                                                                                                   |
|----|-----------------|---------------|------------------------------------------------------------------------------------------------------------------------------------|---------------------------------------------------------------------------------------------------|
| 16 | <i>sav_2179</i> | <i>cvnA4</i>  | <u>ACCGATTGGC</u><br><u>ACCGACCGAGAACCGGC</u>                                                                                      | putative sensor-like histidine<br>kinase                                                          |
| 17 | <i>sav_2188</i> | <i>cvnA5</i>  | <u>ACCGCTCATCGGC</u>                                                                                                               | putative sensor-like histidine<br>kinase                                                          |
| 18 | <i>sav_2694</i> | <i>cvnA6</i>  | <u>ACCGCCGCGGGATCGAGATCCGGC</u><br><u>GCCGACACCGTCCCGCC</u><br><u>GCCGCCACTGGC</u>                                                 | putative sensor-like histidine<br>kinase                                                          |
| 19 | <i>sav_2962</i> | <i>cvnA8</i>  | <u>GCCGAACGGGAACGACCCCGCAGGC</u><br><u>ACCGCCGGTTTGCC</u><br><u>GCCGCCGACGTCCAACCGGCCCGCC</u><br><u>GCCGCACGCGCCAGAGGAAC TTGCC</u> | putative sensor-like histidine<br>kinase                                                          |
| 20 | <i>sav_3877</i> | <i>cvnA9</i>  | <u>GCCGCGCGTCCGGCTCGCC</u><br><u>ACCGCCAACGCGGCGGACCGCTGCC</u><br><u>ACCGCGCGGCGCCGGC</u><br><u>GCCGCGTTGGC</u>                    | putative sensor-like histidine<br>kinase                                                          |
| 21 | <i>sav_6702</i> | <i>cvnA10</i> | <u>GCCGAGCGTACTCCTGGC</u>                                                                                                          | putative sensor-like histidine<br>kinase                                                          |
| 22 | <i>sav_6958</i> | <i>cvnA11</i> | <u>GCCGCGCCCAGGC</u>                                                                                                               | putative sensor-like histidine<br>kinase                                                          |
| 23 | <i>sav_3023</i> | <i>dasR</i>   | <u>GCCGATCGGACAGGTCCGGC</u>                                                                                                        | putative GntR-family<br>transcriptional regulator                                                 |
| 24 | <i>sav_2430</i> | <i>dcuS</i>   | <u>GCCGAAACCCCGCATAACCGCCGCC</u>                                                                                                   | putative two-component<br>system sensor kinase                                                    |
| 25 | <i>sav_3690</i> | <i>fruR</i>   | <u>GCCGCGCTCAGGC</u>                                                                                                               | putative DeoR-family<br>transcriptional regulator                                                 |
| 26 | <i>sav_6666</i> | <i>gylR</i>   | <u>GCCGAGCCATTGGC</u><br><u>ACCGCCCCGTTCGGC</u>                                                                                    | putative IclR-family glycerol<br>operon regulatory protein                                        |
| 27 | <i>sav_5569</i> | <i>hrcA</i>   | <u>GCCGCCCCGCCGGC</u><br><u>ACCGCCCTTGCC</u>                                                                                       | putative HrcA-family<br>heat-inducible transcriptional<br>repressor protein                       |
| 28 | <i>sav_7365</i> | <i>hypX</i>   | <u>GCCGCCACGCCGTCTCGCCGGC</u><br><u>GCCGCGTCATGAACTCCTTGCC</u><br><u>GCCGATCCACCGTCCGGC</u><br><u>GCCGACTGCGATCGTCAGGC</u>         | putative [NiFe] hydrogenase                                                                       |
| 29 | <i>sav_2396</i> | <i>kdpD</i>   | <u>ACCGCGCTCACCTGCCTTTTGCC</u>                                                                                                     | putative two-component<br>system sensor kinase for<br>high-affinity potassium<br>transport system |
| 30 | <i>sav_2463</i> | <i>lexA</i>   | <u>ACCGCTCCAGCAGGC</u><br><u>GCCGACCCGCGTCGGC</u><br><u>ACCGACCCCCTTTCCCCACACCGCC</u><br><u>GCCGACGCGGGTCGGC</u>                   | putative SOS regulatory protein<br>LexA                                                           |
| 31 | <i>sav_1214</i> | <i>litR</i>   | <u>GCCGCGAGAGCGGTCCGGCCCGCC</u>                                                                                                    | putative MerR-family<br>transcriptional regulator                                                 |



|    |                 |              |                                                                                                                                                                                                             |                                                                                                  |
|----|-----------------|--------------|-------------------------------------------------------------------------------------------------------------------------------------------------------------------------------------------------------------|--------------------------------------------------------------------------------------------------|
| 32 | <i>sav_7090</i> | <i>lpsR</i>  | <u>GCCGCATCGGTGAAATCGCC</u>                                                                                                                                                                                 | putative <i>lpsA1</i> transcriptional activator                                                  |
| 33 | <i>sav_5976</i> | <i>malR1</i> | <u>GCCGACAGTTACCCCGCC</u><br><u>GCCGCTCGAACGCTCGCGCTCGGC</u>                                                                                                                                                | putative repressor of <i>malE</i> transcription                                                  |
| 34 | <i>sav_4047</i> | <i>mprA</i>  | <u>GCCGCTCCCGGC</u><br><u>GCCGACCGCACGGCCGGCGCCGGC</u><br><u>GCCGACCCCACTGGC</u><br><u>ACCGATCCGGGGCCGACCCCTGGC</u><br><u>ACCGACCTCCCGCTGATCCCGGC</u><br><u>ACCGATGCTTTCGGC</u><br><u>GCCGAGGAAGGCCCGCC</u> | putative two-component system response regulator                                                 |
| 35 | <i>sav_2462</i> | <i>nrdR</i>  | <u>GCCGACGCGGGTCGGC</u><br><u>ACCGACCCCTTTCACACCGCC</u><br><u>GCCGACCCGCGTCGGC</u><br><u>ACCGCTCCAGCAGGC</u>                                                                                                | putative regulatory protein                                                                      |
| 36 | <i>sav_2512</i> | <i>osaA</i>  | <u>ACCGCCAGGCCGGACGGACCGGC</u><br><u>GCCGCGCGTCTGCC</u><br><u>GCCGAGTACTAGGACGCGGCAGGC</u><br><u>GCCGCGTCCTAGTACTCGGC</u>                                                                                   | putative two-component system sensor kinase (response to osmoadaptation and osmotic stress)      |
| 37 | <i>sav_2511</i> | <i>osaB</i>  | <u>GCCGCACCCCGCCTGTCGCC</u>                                                                                                                                                                                 | putative two-component system response regulator (response to osmoadaptation and osmotic stress) |
| 38 | <i>sav_1148</i> | <i>popR</i>  | <u>GCCGAGGCGATGGGCCGGC</u><br><u>GCCGATCCCTTCCCTTCGGC</u><br><u>GCCGAAGGGGAAGGGATCGGC</u>                                                                                                                   | putative DNA-binding protein                                                                     |
| 39 | <i>sav_5320</i> | <i>rbsR</i>  | <u>ACCGCCCCAGCC</u>                                                                                                                                                                                         | putative LacI-family transcriptional regulator, ribose operon repressor                          |
| 40 | <i>sav_4738</i> | <i>rex</i>   | <u>ACCGAGTAGTCCAAACAGCC</u><br><u>ACCGCCTGCAGCC</u><br><u>ACCGCCCCGTCGAAAGCAGGC</u>                                                                                                                         | putative redox-sensing transcriptional repressor                                                 |
| 41 | <i>sav_2444</i> | <i>rpoD</i>  | <u>ACCGCTGATTCGGC</u><br><u>GCCGCCGGGTCGCTCGCC</u><br><u>ACCGACGACCGCC</u>                                                                                                                                  | RNA polymerase major sigma factor, sigma-70 family ( <i>hrdB</i> )                               |
| 42 | <i>sav_4734</i> | <i>rsbN</i>  | <u>GCCGCTCGGC</u><br><u>GCCGCGATCCGCC</u>                                                                                                                                                                   | putative anti-sigma factor                                                                       |
| 43 | <i>sav_1094</i> | <i>rsbR</i>  | <u>ACCGCCTTTCGCCGGC</u>                                                                                                                                                                                     | putative positive regulatory protein                                                             |
| 44 | <i>sav_1096</i> | <i>rsbT</i>  | <u>GCCGCGTCGCCGCTGCCTGCC</u>                                                                                                                                                                                | putative anti-sigma factor                                                                       |
| 45 | <i>sav_3012</i> | <i>rsbW</i>  | <u>GCCGAGGGTCGCC</u>                                                                                                                                                                                        | putative anti-sigma factor                                                                       |
| 46 | <i>sav_4262</i> | <i>rstP</i>  | <u>ACCGACTGGCTGATGACCGCC</u><br><u>GCCGAGCAGGC</u><br><u>ACCGCATGAGCCCTACTATCGGC</u>                                                                                                                        | putative LacI-family transcriptional regulator                                                   |

|    |                 |              |                                                                                                                                                                 |                                                                                |
|----|-----------------|--------------|-----------------------------------------------------------------------------------------------------------------------------------------------------------------|--------------------------------------------------------------------------------|
| 47 | <i>sav_5141</i> | <i>sdrB</i>  | <u>GCCGCCGCGGAGCGCAGCC</u><br><u>GCCGCCAGCCATCGGC</u><br><u>GCCGCGAGGAGGCCTGCC</u><br><u>GCCGCCGATGGCTGGC</u>                                                   | putative IclR-family<br>transcriptional regulator                              |
| 48 | <i>sav_93</i>   | <i>sig2</i>  | <u>GCCGCCCGGATCCCGGGCCGGC</u><br><br><u>GCCGCCGGCACACGTGGGTCCGCC</u>                                                                                            | putative RNA polymerase<br>ECF-subfamily sigma factor                          |
| 49 | <i>sav_527</i>  | <i>sig4</i>  | <u>GCCGCTCAAGTCCGGC</u><br><u>ACCGACGCACCGCC</u><br><u>ACCGCACCCAGCC</u><br><u>GCCGAGCATCCGCGGCTTGCCGGC</u><br><u>GCCGCCAAGCAGCC</u><br><u>GCCGCCGATGCTCGGC</u> | putative RNA polymerase<br>ECF-subfamily sigma factor                          |
| 50 | <i>sav_663</i>  | <i>sig6</i>  | <u>GCCGCCCCCTCGCC</u>                                                                                                                                           | putative RNA polymerase<br>ECF-subfamily sigma factor                          |
| 51 | <i>sav_741</i>  | <i>sig8</i>  | <u>GCCGACCAAAGACACTTTGGTCCGGC</u><br><u>GCCGCCGGTCTGCTGGAGACCGGC</u>                                                                                            | RNA polymerase alternative<br>sigma factor, similar to<br><i>sco0600, sigB</i> |
| 52 | <i>sav_809</i>  | <i>sig9</i>  | <u>ACCGCTCGGC</u>                                                                                                                                               | putative RNA polymerase<br>ECF-subfamily sigma factor                          |
| 53 | <i>sav_1215</i> | <i>sig17</i> | <u>GCCGCGAGAGCGGTCCGGCCGCC</u>                                                                                                                                  | putative RNA polymerase<br>ECF-subfamily sigma factor                          |
| 54 | <i>sav_1808</i> | <i>sig18</i> | <u>GCCGCGCACCGGCAGGC</u>                                                                                                                                        | putative RNA polymerase<br>ECF-subfamily sigma factor                          |
| 55 | <i>sav_1873</i> | <i>sig19</i> | <u>GCCGCGTGGCCCTGCC</u><br><u>ACCGCCTGCC</u>                                                                                                                    | RNA polymerase alternative<br>sigma factor, similar to<br><i>sco6520, sigK</i> |
| 56 | <i>sav_2597</i> | <i>sig20</i> | <u>GCCGCCGGCCGCCTCGCC</u>                                                                                                                                       | putative RNA polymerase<br>ECF-subfamily sigma factor                          |
| 57 | <i>sav_3038</i> | <i>sig22</i> | <u>GCCGCATGGGTTCGACCTTCTGCC</u>                                                                                                                                 | putative RNA polymerase<br>ECF-subfamily sigma factor                          |
| 58 | <i>sav_3117</i> | <i>sig23</i> | <u>GCCGACGCCTTTGTCCGCC</u><br><u>GCCGCACCTCCCTATCCGGC</u>                                                                                                       | putative RNA polymerase<br>ECF-subfamily sigma factor                          |
| 59 | <i>sav_3318</i> | <i>sig24</i> | <u>GCCGAGGCACCGGC</u>                                                                                                                                           | putative RNA polymerase<br>ECF-subfamily sigma factor                          |
| 60 | <i>sav_3351</i> | <i>sig25</i> | <u>GCCGCGAGCGCACCCCGCC</u>                                                                                                                                      | putative RNA polymerase<br>ECF-subfamily sigma factor                          |
| 61 | <i>sav_3385</i> | <i>sig27</i> | <u>GCCGATGGCAACGGCCGGGGCCGCC</u>                                                                                                                                | putative RNA polymerase<br>ECF-subfamily sigma factor                          |
| 62 | <i>sav_3490</i> | <i>sig29</i> | <u>ACCGCAGTGCACGTATTGGC</u>                                                                                                                                     | RNA polymerase alternative<br>sigma factor, similar to<br><i>sco3068, sigI</i> |
| 63 | <i>sav_3844</i> | <i>sig31</i> | <u>GCCGCCGATGGTAGGGGCTCCGGC</u>                                                                                                                                 | putative RNA polymerase<br>ECF-subfamily sigma factor                          |

|    |                 |              |                                                                                                                          |                                                                                        |
|----|-----------------|--------------|--------------------------------------------------------------------------------------------------------------------------|----------------------------------------------------------------------------------------|
| 64 | <i>sav_3888</i> | <i>sig32</i> | <u>GCCGACACGGCACAACCCGGC</u>                                                                                             | putative RNA polymerase<br>ECF-subfamily sigma factor                                  |
| 65 | <i>sav_4185</i> | <i>sig34</i> | <u>GCCGAACCCGGC</u>                                                                                                      | RNA polymerase alternative<br>sigma factor, similar to<br><i>sco4035</i> , <i>sigF</i> |
| 66 | <i>sav_4186</i> | <i>sig35</i> | <u>GCCGACATGTGACATTCTGCC</u><br><u>GCCGCGCCCTCGCC</u><br><u>GCCGCGGCAAACGCGCTTCCGGC</u>                                  | RNA polymerase alternative<br>sigma factor, similar to<br><i>sco4034</i> , <i>sigN</i> |
| 67 | <i>sav_4207</i> | <i>sig36</i> | <u>GCCGATCCGCC</u>                                                                                                       | putative RNA polymerase<br>ECF-subfamily sigma factor                                  |
| 68 | <i>sav_4427</i> | <i>sig39</i> | <u>GCCGACAGAAGCAGGACCCGGC</u><br><u>GCCGACTTCGCC</u>                                                                     | putative RNA polymerase<br>ECF-subfamily sigma factor                                  |
| 69 | <i>sav_4561</i> | <i>sig40</i> | <u>ACCGCGGTACAGGC</u><br><u>GCCGACCCCGCATGCCCGGC</u><br><u>ACCGCAAAGACGCTCCCCGCC</u>                                     | putative RNA polymerase<br>ECF-subfamily sigma factor                                  |
| 70 | <i>sav_4706</i> | <i>sig41</i> | <u>ACCGACCCGCCGGC</u><br><u>GCCGATACACAGCCCCCGGC</u><br><u>ACCGACGGACAGCCGAGCGTTCCGCC</u><br><u>GCCGCGCTTCTGGC</u>       | putative RNA polymerase<br>ECF-subfamily sigma factor                                  |
| 71 | <i>sav_4735</i> | <i>sig42</i> | <u>ACCGCTCCCCGCC</u>                                                                                                     | putative RNA polymerase<br>ECF-subfamily sigma factor,<br><i>bldN</i>                  |
| 72 | <i>sav_4987</i> | <i>sig43</i> | <u>GCCGCGGCTCGAGTCGTGGCTTGGC</u><br><u>GCCGCGGCTCGGCGCCTGGCCCCGGC</u>                                                    | putative RNA polymerase<br>ECF-subfamily sigma factor                                  |
| 73 | <i>sav_5123</i> | <i>sig45</i> | <u>ACCGATGCGCACACTGCC</u><br><u>GCCGACGGAGATTTCACTCTCAGGC</u>                                                            | putative RNA polymerase<br>ECF-subfamily sigma factor                                  |
| 74 | <i>sav_5398</i> | <i>sig46</i> | <u>GCCGAACGTTTCCGGC</u><br><u>GCCGACAGGATCGGGCCCCGGCCCCGCC</u><br><u>GCCGCCCCGGC</u><br><u>GCCGCAGGCGCCGAAACGTTCCGGC</u> | putative RNA polymerase<br>ECF-subfamily sigma factor                                  |
| 75 | <i>sav_5679</i> | <i>sig47</i> | <u>GCCGCGCTCCGAGGACTCAGGC</u>                                                                                            | putative RNA polymerase<br>sigma factor, <i>hrdA</i>                                   |
| 76 | <i>sav_5903</i> | <i>sig48</i> | <u>GCCGCCGGTCCCTGTGCCGTCCGGC</u>                                                                                         | putative RNA polymerase<br>ECF-subfamily sigma factor                                  |
| 77 | <i>sav_6077</i> | <i>sig49</i> | <u>GCCGCGGGCATGCGAAAGCCCCGCC</u>                                                                                         | putative RNA polymerase<br>ECF-subfamily sigma factor                                  |
| 78 | <i>sav_6337</i> | <i>sig50</i> | <u>GCCGCTCCGGACCCGGACATCCGGC</u>                                                                                         | putative RNA polymerase<br>ECF-subfamily sigma factor                                  |
| 79 | <i>sav_6385</i> | <i>sig52</i> | <u>ACCGCCGGGTACGAGGAGTCTCGCC</u>                                                                                         | putative RNA polymerase<br>ECF-subfamily sigma factor                                  |
| 80 | <i>sav_6582</i> | <i>sig53</i> | <u>ACCGCATTCGGAGCGGTTCGCC</u><br><u>GCCGATGAAACAACCTGGC</u>                                                              | putative RNA polymerase<br>ECF-subfamily sigma factor                                  |
| 81 | <i>sav_6785</i> | <i>sig54</i> | <u>GCCGCCCCGGCAAACCTCCCCGCC</u><br><u>ACCGCGGACCTCAGCC</u>                                                               | putative RNA polymerase<br>ECF-subfamily sigma factor                                  |

|    |                 |              |                                                                                                                |                                                                                                              |
|----|-----------------|--------------|----------------------------------------------------------------------------------------------------------------|--------------------------------------------------------------------------------------------------------------|
|    |                 |              | <u>GCCGCCGCCCGGCGGGAGGTTGCC</u>                                                                                |                                                                                                              |
| 82 | <i>sav_7068</i> | <i>sig55</i> | <u>GCCGACACCGGTTCCGCC</u>                                                                                      | putative RNA polymerase<br>ECF-subfamily sigma factor                                                        |
| 83 | <i>sav_7292</i> | <i>sig56</i> | <u>GCCGCACCGCCGAGTCGCC</u><br><u>ACCGCAACGGCGTCACGTCCGGC</u><br><u>ACCGATCGGGACTGCC</u><br><u>ACCGCGTCCGCC</u> | putative RNA polymerase<br>ECF-subfamily sigma factor                                                        |
| 84 | <i>sav_7400</i> | <i>sig57</i> | <u>GCCGCCGTCCGCC</u><br><u>ACCGCGCATTCGGC</u>                                                                  | RNA polymerase alternative<br>sigma factor, similar to<br><i>sco7341</i> , <i>sigG</i>                       |
| 85 | <i>sav_7424</i> | <i>sig58</i> | <u>GCCGCGACCGCACCGGC</u>                                                                                       | putative RNA polymerase<br>ECF-subfamily sigma factor                                                        |
| 86 | <i>sav_3304</i> | <i>sig59</i> | <u>ACCGCAGGGCCGGCCTGGC</u><br><u>GCCGCCCTGGC</u>                                                               | putative RNA polymerase<br>ECF-subfamily sigma factor                                                        |
| 87 | <i>sav_3352</i> | <i>smrA</i>  | <u>GCCGCGAGCGCACCCCGCC</u>                                                                                     | putative two-component<br>system response regulator                                                          |
| 88 | <i>sav_4268</i> | <i>ssfR</i>  | <u>ACCGCACCCACGGATCAATCGGC</u><br><u>GCCGCTCTGCC</u>                                                           | putative IclR-family<br>transcriptional regulator                                                            |
| 89 | <i>sav_4997</i> | <i>wblB</i>  | <u>GCCGACGGAACTGCCGCCTGCC</u><br><u>GCCGAAGATGGCTCACCGCC</u>                                                   | putative WhiB-family<br>transcriptional regulator;<br>putative role in cell cycle<br>control                 |
| 90 | <i>sav_3216</i> | <i>wblI</i>  | <u>ACCGCACCCCTCCAGGCCCGCC</u><br><u>ACCGCTGGCCTTCGGCGGCCCGCC</u>                                               | putative WhiB-family<br>transcriptional regulator;<br>putative role in cell cycle<br>control ( <i>whiD</i> ) |
| 91 | <i>sav_5042</i> | <i>whiB</i>  | <u>ACCGATGGCTGTAGGC</u><br><u>ACCGATTTCGGC</u>                                                                 | putative WhiB-family<br>transcriptional regulator, WhiB<br>protein                                           |
| 92 | <i>sav_2630</i> | <i>whiG</i>  | <u>ACCGACAGGTCACCCAGGC</u><br><u>GCCGCCCGGGTCCCGCCATTGCC</u>                                                   | RNA polymerase alternative<br>sigma factor                                                                   |
| 93 | <i>sav_4998</i> | <i>whiK</i>  | <u>GCCGAAGATGGCTCACCGCC</u><br><u>GCCGACGGAACTGCCGCCTGCC</u>                                                   | putative two-component<br>system response regulator,<br><i>bldM</i>                                          |
| 94 | <i>sav_1693</i> | <i>whmD</i>  | <u>GCCGAGTCTTGACCCGCC</u><br><u>GCCGACTCCGCGCGCCGCC</u><br><u>GCCGCCCGGCACGATCTCGCC</u>                        | putative WhiB-family<br>transcriptional regulator, <i>wblH</i>                                               |
| 95 | <i>sav_29</i>   |              | <u>ACCGCCTTCGCGCCCGCCAGCC</u><br><u>ACCGCGGGCGTGAGGCGCTGCC</u><br><u>GCCGCCTGCGGCCGTCTGCC</u>                  | putative PadR-like family<br>transcriptional regulator                                                       |
| 96 | <i>sav_53</i>   |              | <u>ACCGCACGGTCCGCC</u>                                                                                         | putative transcriptional<br>regulatory protein                                                               |
| 97 | <i>sav_67</i>   |              | <u>GCCGAGTCCGGTGACGGACAGCC</u><br><u>GCCGCTGCGTCCGACGCCTCCGCC</u>                                              | putative regulatory protein                                                                                  |

|     |                |                                                                                                                                                                   |                                                     |
|-----|----------------|-------------------------------------------------------------------------------------------------------------------------------------------------------------------|-----------------------------------------------------|
| 98  | <i>sav_73</i>  | <u>GCCGCCGGAAGCCTGTGCCAGGC</u>                                                                                                                                    | putative two-component<br>system response regulator |
| 99  | <i>sav_82</i>  | <u>ACCGCCGAGGCACTGCCCGGC</u>                                                                                                                                      | putative TetR-family<br>transcriptional regulator   |
| 100 | <i>sav_111</i> | <u>GCCGCAGTCACCGCCCGCC</u><br><u>GCCGCTCCGCC</u><br><u>GCCGCCTCGTGCCGCGCCGCC</u><br><u>GCCGCTCCGCC</u><br><u>GCCGAGGCTCTGCGTGCCCGGC</u><br><u>GCCGACTGTACAGGC</u> | putative LuxR-family<br>transcriptional regulator   |
| 101 | <i>sav_134</i> | <u>GCCGCACGCTTTTGCC</u><br><u>GCCGCCGCCTGCC</u>                                                                                                                   | putative two-component<br>system sensor kinase      |
| 102 | <i>sav_143</i> | <u>GCCGCTCAGAGGCTCGGC</u>                                                                                                                                         | putative TetR-family<br>transcriptional regulator   |
| 103 | <i>sav_146</i> | <u>GCCGACTTTCGGACGGTCCTGCC</u>                                                                                                                                    | putative TetR-family<br>transcriptional regulator   |
| 104 | <i>sav_151</i> | <u>GCCGAGCGGCCGGC</u><br><u>GCCGCTCGGC</u>                                                                                                                        | putative TetR-family<br>transcriptional regulator   |
| 105 | <i>sav_231</i> | <u>GCCGAGAGGTCGCCCGGC</u>                                                                                                                                         | putative MerR-family<br>transcriptional regulator   |
| 106 | <i>sav_234</i> | <u>GCCGCCTGCC</u>                                                                                                                                                 | putative regulatory protein                         |
| 107 | <i>sav_235</i> | <u>GCCGCCTGCC</u>                                                                                                                                                 | putative anti-sigma factor<br>antagonist            |
| 108 | <i>sav_292</i> | <u>GCCGCCACTCCATGCCCAACCGGC</u>                                                                                                                                   | putative TetR-family<br>transcriptional regulator   |
| 109 | <i>sav_306</i> | <u>GCCGCCGGGTGGATCCAGCC</u><br><u>GCCGACCGGC</u><br><u>ACCGAAGCCGGC</u><br><u>ACCGACAGACTGCC</u>                                                                  | putative transcriptional<br>regulatory protein      |
| 110 | <i>sav_323</i> | <u>GCCGAAGAGCGGCGCTGTAACAGGC</u><br><u>GCCGCTCTTCGGCAGCCAGCC</u>                                                                                                  | putative MerR-family<br>transcriptional regulator   |
| 111 | <i>sav_373</i> | <u>ACCGCACAGTCCGGC</u>                                                                                                                                            | putative LysR-family<br>transcriptional regulator   |
| 112 | <i>sav_431</i> | <u>GCCGAGTCCCGGC</u><br><u>GCCGCGCCACCTCCATTCGGC</u><br><u>ACCGCTCGGC</u><br><u>ACCGCGCCAGTGGTCCTGCC</u>                                                          | putative TetR-family<br>transcriptional regulator   |
| 113 | <i>sav_436</i> | <u>GCCGATGGCAACGTCGGC</u><br><u>ACCGCGACCGGC</u><br><u>GCCGACGTTGCCATCGGC</u><br><u>GCCGCGCTGATCGGC</u>                                                           | putative TetR-family<br>transcriptional regulator   |
| 114 | <i>sav_448</i> | <u>ACCGCCTTGACCGGTCGGC</u>                                                                                                                                        | putative TetR-family<br>transcriptional regulator   |
| 115 | <i>sav_472</i> | <u>ACCGCAGAGATCGGC</u>                                                                                                                                            | putative regulatory protein                         |

|     |                |                                                                                                                                                                                                                                 |                                                     |
|-----|----------------|---------------------------------------------------------------------------------------------------------------------------------------------------------------------------------------------------------------------------------|-----------------------------------------------------|
| 116 | <i>sav_508</i> | <u>GCCGACCCCCGGCCGTTCGCC</u>                                                                                                                                                                                                    | putative TetR-family<br>transcriptional regulator   |
| 117 | <i>sav_520</i> | <u>GCCGCCGCCCTTGCC</u>                                                                                                                                                                                                          | putative transcriptional<br>regulator               |
| 118 | <i>sav_537</i> | <u>GCCGCCTGCACCGCC</u><br><u>GCCGAGTGGTGGCAGCC</u>                                                                                                                                                                              | putative Sir2-family regulator<br>protein           |
| 119 | <i>sav_554</i> | <u>GCCGCGACTCTGGC</u><br><u>GCCGCACAGCC</u><br><u>ACCGAAGTGGGATTCGGC</u><br><u>GCCGCCTGTCCAGCC</u><br><u>GCCGCACGGCTGAAGGGCCTGGC</u>                                                                                            | putative LacI-family<br>transcriptional regulator   |
| 120 | <i>sav_576</i> | <u>GCCGCCACCAGCACACAGCC</u><br><u>GCCGAGGAGACCCTGGC</u>                                                                                                                                                                         | putative TetR-family<br>transcriptional regulator   |
| 121 | <i>sav_577</i> | <u>ACCGCGTCCGGC</u>                                                                                                                                                                                                             | putative TetR-family<br>transcriptional regulator   |
| 122 | <i>sav_588</i> | <u>ACCGAATCTTCCGGC</u>                                                                                                                                                                                                          | putative AsnC-family<br>transcriptional regulator   |
| 123 | <i>sav_621</i> | <u>GCCGCCCTTCGGC</u><br><u>ACCGCCGCCACAAGGGAGACCGCC</u>                                                                                                                                                                         | putative MarR-family<br>transcriptional regulator   |
| 124 | <i>sav_636</i> | <u>ACCGAACCGGC</u><br><u>ACCGACTGACAATTGGC</u><br><u>ACCGCGCTGCC</u><br><u>GCCGCTGGCGCCCCTTGACCAGGC</u><br><u>GCCGCAGTCGCCGAGTCGCC</u>                                                                                          | putative AraC-family<br>transcriptional regulator   |
| 125 | <i>sav_648</i> | <u>GCCGACGTGTCAGGGCCGGC</u><br><u>ACCGCGTCGGCACCGGGGACCCGCC</u><br><u>ACCGCTGTGTTCCCGCC</u><br><u>GCCGACCAGCC</u><br><u>GCCGCCGTTGAGACGCCTGGC</u><br><u>GCCGACGTGTTCCGCCGTCGCC</u><br><u>GCCGCGGGCCGGC</u><br><u>GCCGCCAGCC</u> | putative two-component<br>system response regulator |
| 126 | <i>sav_669</i> | <u>GCCGCCTCCGGC</u><br><u>ACCGCCGTCCGCCGAACAGCC</u><br><u>GCCGCCGACGAGCCACCCCTCCGGC</u>                                                                                                                                         | putative TetR-family<br>transcriptional regulator   |
| 127 | <i>sav_705</i> | <u>GCCGCCGACGGCGATCCCGGC</u><br><u>ACCGCCATCTGCGCTGGC</u><br><u>GCCGCGGGCCGGC</u><br><u>GCCGCGTACAACAGCCGGGATCGCC</u>                                                                                                           | putative TetR-family<br>transcriptional regulator   |
| 128 | <i>sav_722</i> | <u>GCCGACGCCAACGACATCGCC</u><br><u>GCCGCACCGCGACGGCGGCCAGGC</u><br><u>ACCGCTCACACCCTCGCC</u>                                                                                                                                    | putative AraC-family<br>transcriptional regulator   |
| 129 | <i>sav_729</i> | <u>ACCGATCCGGC</u>                                                                                                                                                                                                              | putative LysR-family<br>transcriptional regulator   |

|     |                 |                                                                                                                                                                                       |                                                     |
|-----|-----------------|---------------------------------------------------------------------------------------------------------------------------------------------------------------------------------------|-----------------------------------------------------|
| 130 | <i>sav_742</i>  | <u>GCCGCCCGTTCATTCCAGCAGCC</u><br><u>GCCGAACGCAAAATCGCTCGGC</u><br><u>GCCGAGCGGACGCACTCGGC</u><br><u>GCCGCCTCGTACCCGGC</u><br><u>GCCGAGTGCGTCCGCTCGGCCGGC</u><br><u>GCCGACATCCGGC</u> | putative AraC-family<br>transcriptional regulator   |
| 131 | <i>sav_771</i>  | <u>GCCGCCCTGGTGCCTGCC</u>                                                                                                                                                             | putative LysR-family<br>transcriptional regulator   |
| 132 | <i>sav_775</i>  | <u>GCCGAACCCCGAGGCCGAAGCAGCC</u><br><u>GCCGCGGCCTGGGGGCTGCTTCGGC</u>                                                                                                                  | putative TetR-family<br>transcriptional regulator   |
| 133 | <i>sav_901</i>  | <u>ACCGAACCAACCCAGGC</u>                                                                                                                                                              | putative transcriptional<br>regulator               |
| 134 | <i>sav_913</i>  | <u>ACCGCTGTTGGC</u>                                                                                                                                                                   | putative TetR-family<br>transcriptional regulator   |
| 135 | <i>sav_932</i>  | <u>GCCGCTCCTCCTGCAGCC</u><br><u>GCCGCTCCGCC</u><br><u>ACCGCTCGACCATATCCAGGC</u>                                                                                                       | putative two-component<br>system response regulator |
| 136 | <i>sav_965</i>  | <u>GCCGCAGCCGGC</u><br><u>GCCGCCCGGTACGCCGGC</u>                                                                                                                                      | putative transcriptional<br>regulator               |
| 137 | <i>sav_972</i>  | <u>ACCGACTGCGACGAAGAACCGCC</u>                                                                                                                                                        | putative LacI-family<br>transcriptional regulator   |
| 138 | <i>sav_1047</i> | <u>GCCGCACTCCGCC</u><br><u>GCCGCCCGACGGGGCAGGC</u><br><u>GCCGCCAGCGCAACGCCAGGC</u>                                                                                                    | putative regulatory protein                         |
| 139 | <i>sav_1056</i> | <u>GCCGCTCGGC</u>                                                                                                                                                                     | putative MarR-family<br>transcriptional regulator   |
| 140 | <i>sav_1085</i> | <u>ACCGATCGGCATCGAACCGCC</u><br><u>ACCGACACGGAGATTGCC</u>                                                                                                                             | putative two-component<br>system sensor kinase      |
| 141 | <i>sav_1091</i> | <u>ACCGCGAAGCAGCC</u><br><u>GCCGATGCCGGCGGGACGCCCGGC</u>                                                                                                                              | putative anti-sigma factor<br>antagonist            |
| 142 | <i>sav_1099</i> | <u>ACCGCTGTGGCCTGTGGCTCGCC</u><br><u>GCCGCCTCGACCAGGC</u>                                                                                                                             | putative MarR-family<br>transcriptional regulator   |
| 143 | <i>sav_1100</i> | <u>GCCGCCTCGACCAGGC</u><br><u>ACCGCTGTGGCCTGTGGCTCGCC</u>                                                                                                                             | putative regulatory protein                         |
| 144 | <i>sav_1102</i> | <u>ACCGCGACCAGTTGTGTCGTCGGC</u><br><u>GCCGCAGTCCGCCTACCGTCGCC</u><br><u>ACCGCCCGGGTGTCCCGCCGGC</u><br><u>ACCGCCGCGCAGGC</u><br><u>GCCGAGCGCCCGGC</u>                                  | putative anti-sigma factor<br>antagonist            |
| 145 | <i>sav_1103</i> | <u>GCCGAGGGTAGGC</u><br><u>GCCGCGTAGCCGGACAGCC</u>                                                                                                                                    | putative regulatory protein                         |
| 146 | <i>sav_1153</i> | <u>ACCGATCCGGC</u><br><u>GCCGCGTCCCGCC</u>                                                                                                                                            | putative regulatory protein                         |
| 147 | <i>sav_1163</i> | <u>ACCGCAGATTCCGCC</u>                                                                                                                                                                | putative LysR-family                                |

|     |                 |                                                                                                                             |                                                                                |
|-----|-----------------|-----------------------------------------------------------------------------------------------------------------------------|--------------------------------------------------------------------------------|
| 148 | <i>sav_1209</i> | <u>GCCGCATGTCAGCCGTAGGC</u><br><u>ACCGCGGCTCTTTTCCGGC</u><br><u>ACCGCCGTCCGCC</u>                                           | transcriptional regulator<br>putative LysR-family<br>transcriptional regulator |
| 149 | <i>sav_1222</i> | <u>GCCGACGTCGATCGGCGGCCGGC</u><br><u>GCCGCCGATCGACGTCGGC</u><br><u>GCCGCCCTTGATCCGCC</u><br><u>GCCGAGGGGAGCCCGCGCCGGC</u>   | putative ROK-family<br>transcriptional regulator                               |
| 150 | <i>sav_1236</i> | <u>GCCGCCTGCCCCGCCCGTTGCC</u>                                                                                               | putative regulatory protein                                                    |
| 151 | <i>sav_1271</i> | <u>ACCGAACACGTCTCCGCGTCGGC</u><br><u>ACCGTCACTTCTTGCC</u>                                                                   | putative DNA-binding protein                                                   |
| 152 | <i>sav_1278</i> | <u>ACCGCCTCGGC</u><br><u>GCCGCCCCGC</u>                                                                                     | putative CRP-like regulatory<br>protein                                        |
| 153 | <i>sav_1282</i> | <u>GCCGCCGGTCAGGACCATCCGGC</u><br><u>ACCGCCCCGCCACTGGCTGGC</u><br><u>ACCGAATCCGGTCAGGC</u>                                  | putative two-component<br>system response regulator                            |
| 154 | <i>sav_1305</i> | <u>GCCGAAGTCCCGGC</u><br><u>GCCGAATCCGACCCGCGTCGCC</u>                                                                      | putative GntR-family<br>transcriptional regulator                              |
| 155 | <i>sav_1352</i> | <u>ACCGCGTCTCGTCCAGGC</u><br><u>GCCGCCGGGGATCCAGCC</u><br><u>ACCGCGTCCGGGAGCGGTCGGC</u>                                     | putative LysR-family<br>transcriptional regulator                              |
| 156 | <i>sav_1359</i> | <u>GCCGCCTGCC</u>                                                                                                           | putative TetR-family<br>transcriptional regulator                              |
| 157 | <i>sav_1392</i> | <u>GCCGATTACACAGGCCGCC</u>                                                                                                  | putative transcriptional<br>regulator                                          |
| 158 | <i>sav_1406</i> | <u>GCCGCCGCGTGCAGGGGCCGCC</u><br><u>GCCGACGACGAGCCTCGCC</u>                                                                 | putative GntR-family<br>transcriptional regulator                              |
| 159 | <i>sav_1433</i> | <u>ACCGCGGGCCGCGCCATCGCC</u>                                                                                                | putative DeoR-family<br>transcriptional regulator                              |
| 160 | <i>sav_1437</i> | <u>GCCGACGTACGCAGCC</u><br><u>GCCGCCTGCTCAGCAGGC</u><br><u>GCCGCCCGCTGTTGATGACCCGGC</u><br><u>GCCGCCTGCTGAGCAGGCGGCCGGC</u> | putative regulatory protein                                                    |
| 161 | <i>sav_1439</i> | <u>ACCGCCGTCGGC</u>                                                                                                         | putative TetR-family<br>transcriptional regulator                              |
| 162 | <i>sav_1442</i> | <u>ACCGCGGGGCCCGGCC</u>                                                                                                     | putative ROK-family<br>transcriptional regulator                               |
| 163 | <i>sav_1465</i> | <u>GCCGACGCCGCC</u>                                                                                                         | putative two-component<br>system sensor kinase                                 |
| 164 | <i>sav_1466</i> | <u>ACCGCTTCGTCTCACTCTTCGCC</u>                                                                                              | putative TetR-family<br>transcriptional regulator                              |
| 165 | <i>sav_1517</i> | <u>GCCGAAGGCGGAACCCGGCCCTGCC</u><br><u>GCCGCTGCTGCC</u>                                                                     | putative LysR-family<br>transcriptional regulator                              |
| 166 | <i>sav_1524</i> | <u>GCCGCGCGGTGAGCCATGCCCGGC</u>                                                                                             | putative TetR-family                                                           |



|     |                 |                                   |                                  |
|-----|-----------------|-----------------------------------|----------------------------------|
|     |                 | <u>GCCGACCGTCAGGGCCGCC</u>        | transcriptional regulator        |
|     |                 | <u>ACCGCTCTCCCCGCC</u>            |                                  |
| 167 | <i>sav_1541</i> | <u>ACCGCCCTTCGGC</u>              | putative TetR-family             |
|     |                 | <u>ACCGATCGCCACCGGC</u>           | transcriptional regulator        |
| 168 | <i>sav_1612</i> | <u>GCCGCGCCGTTAGGC</u>            | putative two-component           |
|     |                 | <u>GCCGCGGGATGTCCCGGC</u>         | system response regulator        |
| 169 | <i>sav_1619</i> | <u>ACCGCGGCAGGAACCCCGGC</u>       | putative GntR-family             |
|     |                 | <u>ACCGCGCCGCC</u>                | transcriptional regulator        |
| 170 | <i>sav_1637</i> | <u>GCCGCTGTGTAGGGTTGCC</u>        | putative TetR-family             |
|     |                 | <u>GCCGCCACCGTGACAGGC</u>         | transcriptional regulator        |
| 171 | <i>sav_1644</i> | <u>GCCGACGTGAAGCGGTAGCC</u>       | putative regulatory protein      |
|     |                 | <u>ACCGCTTCACGTCGGC</u>           |                                  |
| 172 | <i>sav_1669</i> | <u>ACCGCGACCCGCC</u>              | putative transcription accessory |
|     |                 | <u>GCCGCGCCCGGCCACCGCGCCGCC</u>   | protein                          |
|     |                 | <u>GCCGCGGATCTGCC</u>             |                                  |
|     |                 | <u>GCCGCCGAACAGCC</u>             |                                  |
| 173 | <i>sav_1678</i> | <u>ACCGCGTCGCCGCC</u>             | putative MerR-family             |
|     |                 |                                   | transcriptional regulator        |
| 174 | <i>sav_1707</i> | <u>GCCGCGTCGCC</u>                | putative regulatory protein      |
| 175 | <i>sav_1765</i> | <u>ACCGACAGCAGGGCCGAGCCGCC</u>    | putative AraC-family             |
|     |                 |                                   | transcriptional regulator        |
| 176 | <i>sav_1778</i> | <u>GCCGCGGACGGGTCGCC</u>          | putative TetR-family             |
|     |                 |                                   | transcriptional regulator        |
| 177 | <i>sav_1786</i> | <u>ACCGCGCGGCGCCGTCGCC</u>        | putative MerR-family             |
|     |                 | <u>GCCGCCCCACCGCC</u>             | transcriptional regulator        |
|     |                 | <u>GCCGCGGCGCCGGCTCGGC</u>        |                                  |
| 178 | <i>sav_1811</i> | <u>GCCGCCCGTGTGCGCCGAAATCAGCC</u> | putative regulatory protein      |
|     |                 | <u>GCCGCTCATGGGGAAGACGACAGGC</u>  |                                  |
|     |                 | <u>ACCGCACTCCTTCTCCGGC</u>        |                                  |
|     |                 | <u>GCCGACCCCTGCTCAAAGCCTGGC</u>   |                                  |
|     |                 | <u>GCCGAACTCCGGACCGCC</u>         |                                  |
| 179 | <i>sav_1829</i> | <u>ACCGAGGGGCGCCAGGC</u>          | putative ROK-family              |
|     |                 | <u>GCCGCGGAGTCGTCAGGCGGTCCGCC</u> | transcriptional regulator        |
|     |                 | <u>GCCGCGGCTCGTACGCCGCC</u>       |                                  |
|     |                 | <u>GCCGCCGCCTGGC</u>              |                                  |
|     |                 | <u>GCCGAGGCTGCCCGCC</u>           |                                  |
|     |                 | <u>ACCGACGACTTTCGCC</u>           |                                  |
| 180 | <i>sav_1830</i> | <u>GCCGCCACTGCC</u>               | putative GntR-family             |
|     |                 |                                   | transcriptional regulator        |
| 181 | <i>sav_1839</i> | <u>GCCGCCCAGCGGGATCGGCTCGGC</u>   | putative MarR-family             |
|     |                 | <u>ACCGAGGCCCGCC</u>              | transcriptional regulator        |
| 182 | <i>sav_1990</i> | <u>GCCGACGTCCGGC</u>              | putative two-component           |
|     |                 | <u>GCCGCGGCCTCCCGCAGGCAGCC</u>    | system sensor kinase             |
|     |                 | <u>GCCGCGGCTTCGGACGGACAGGC</u>    |                                  |

|     |                 |                                                                                                                                                                                  |                                                     |
|-----|-----------------|----------------------------------------------------------------------------------------------------------------------------------------------------------------------------------|-----------------------------------------------------|
| 183 | <i>sav_1997</i> | <u>ACCGACCGACAGGTAGGC</u>                                                                                                                                                        | putative IclR-family<br>transcriptional regulator   |
| 184 | <i>sav_2033</i> | <u>GCCGCCGGGCAGTCGCC</u>                                                                                                                                                         | putative LuxR-family<br>transcriptional regulator   |
| 185 | <i>sav_2056</i> | <u>GCCGATGCGGCGGACATCCGCC</u><br><u>GCCGCCATGCCTTCGGCGTCAGGC</u><br><u>GCCGCATCGGC</u><br><u>GCCGCGTCGGC</u><br><u>GCCGCTCTTGAGGCCCGCGGCAGGC</u><br><u>GCCGAAGGCATGGCGGCTGGC</u> | putative TetR-family<br>transcriptional regulator   |
| 186 | <i>sav_2070</i> | <u>ACCGAAACCATGAAGGAGTTGGC</u><br><u>GCCGCCGCACACGATCTGGC</u>                                                                                                                    | putative regulatory protein                         |
| 187 | <i>sav_2076</i> | <u>GCCGAACCGTGCTGGC</u><br><u>GCCGAGGGGCTCCGCC</u><br><u>ACCGCCCCCTCGCGCTGCC</u><br><u>GCCGAGGAGGCCCGATTGCC</u>                                                                  | putative regulatory protein                         |
| 188 | <i>sav_2081</i> | <u>GCCGACACCGGCGTCCACACCGGC</u><br><u>GCCGACGTCGGCCTGGC</u><br><u>GCCGACGTCGGC</u>                                                                                               | putative LuxR-family<br>transcriptional regulator   |
| 189 | <i>sav_2098</i> | <u>GCCGCCTCGCTCGATCCGACCGGC</u><br><u>GCCGCGCTCTGGGTATATTAGGC</u><br><u>ACCGCGAAGGCGGGCCCGCC</u>                                                                                 | putative TetR-family<br>transcriptional regulator   |
| 190 | <i>sav_2114</i> | <u>GCCGCCCGAACGGATATGTGTCCGGC</u><br><u>GCCGCCGACCCGACCGTCGCC</u>                                                                                                                | putative LacI-family<br>transcriptional regulator   |
| 191 | <i>sav_2124</i> | <u>ACCGCGGACGCCGCC</u><br><u>ACCGCAGGGCCGCTCGCC</u>                                                                                                                              | putative regulatory protein                         |
| 192 | <i>sav_2248</i> | <u>GCCGCGCCCCGATGGAAAACCGGC</u><br><u>GCCGCCACGATGAGGCCCGCC</u>                                                                                                                  | putative ROK-family<br>transcriptional regulator    |
| 193 | <i>sav_2257</i> | <u>GCCGCATCCCCGTCGCC</u><br><u>GCCGCATCCCCGGC</u>                                                                                                                                | putative two-component<br>system response regulator |
| 194 | <i>sav_2301</i> | <u>GCCGCCACCGAGCGGCCCCGCC</u><br><u>GCCGCGCTCGGTGGCGGCCCGCC</u><br><u>GCCGACACGCCACACCCCGGC</u><br><u>ACCGCGCGGAGGCCCGGC</u>                                                     | putative regulatory protein                         |
| 195 | <i>sav_2332</i> | <u>GCCGCTCCGGC</u>                                                                                                                                                               | putative ArsR-family<br>transcriptional regulator   |
| 196 | <i>sav_2371</i> | <u>GCCGCTTGCGGGAATATTGGC</u><br><u>GCCGCAACAGCTGCC</u><br><u>GCCGATAGGCTCTGCC</u>                                                                                                | putative two-component<br>system response regulator |
| 197 | <i>sav_2419</i> | <u>GCCGATTGACGTGTGTTTCAGGC</u>                                                                                                                                                   | putative GntR-family<br>transcriptional regulator   |
| 198 | <i>sav_2454</i> | <u>GCCGACCGCC</u>                                                                                                                                                                | putative TetR-family<br>transcriptional regulator   |
| 199 | <i>sav_2499</i> | <u>GCCGAGGCGGACCACCCGCCGCC</u>                                                                                                                                                   | putative AraC-family                                |

|     |                 |                                                                                                                                                                                                                      |                                                          |
|-----|-----------------|----------------------------------------------------------------------------------------------------------------------------------------------------------------------------------------------------------------------|----------------------------------------------------------|
| 200 | <i>sav_2569</i> | <u>GCCGCCGATCTTCCGGAGGTTGCC</u>                                                                                                                                                                                      | transcriptional regulator<br>putative LacI-family        |
| 201 | <i>sav_2601</i> | <u>GCCGCGCCGCC</u>                                                                                                                                                                                                   | transcriptional regulator<br>putative PadR-family        |
| 202 | <i>sav_2629</i> | <u>GCCGCCGAGGGGAGCCACTCCGGC</u><br><u>GCCGCTCGAATCCTTGGC</u>                                                                                                                                                         | transcriptional regulator<br>putative TetR-family        |
| 203 | <i>sav_2652</i> | <u>ACCGACCTCCTCGGTCCGCC</u><br><u>ACCGCTTCACCCACTTCCGGC</u><br><u>GCCGCGTTTACCGGC</u><br><u>GCCGACTTGCCTCCGGC</u>                                                                                                    | transcriptional regulator<br>putative regulatory protein |
| 204 | <i>sav_2687</i> | <u>ACCGCGCGTCCGCCGCC</u><br><u>GCCGACACAGGCCGGC</u>                                                                                                                                                                  | putative IclR-family<br>transcriptional regulator        |
| 205 | <i>sav_2727</i> | <u>GCCGCCGTGAATGGACCGCC</u>                                                                                                                                                                                          | putative TetR-family<br>transcriptional regulator        |
| 206 | <i>sav_2729</i> | <u>ACCGACGTA CTGGGCCCCCGGC</u><br><u>ACCGCCGCCCGTCCGCC</u><br><u>GCCGCTCCTCCGGAACCGGC</u>                                                                                                                            | putative LuxR-family<br>transcriptional regulator        |
| 207 | <i>sav_2810</i> | <u>GCCGACGAAACGAGCCGGC</u><br><u>GCCGCCGAATCAGGC</u>                                                                                                                                                                 | putative AsnC-family<br>transcriptional regulator        |
| 208 | <i>sav_2814</i> | <u>GCCCGAGGCAGGC</u>                                                                                                                                                                                                 | putative TetR-family<br>transcriptional regulator        |
| 209 | <i>sav_2834</i> | <u>GCCGCCGGCCGCGGGCGCTCCGCC</u><br><u>GCCCGC GCAACTGCCGGC</u><br><u>ACCGCGATATGACCGGC</u><br><u>GCCGAAGCCCCTCAGTCTCCGCC</u><br><u>GCCGAGCGCCCGCGGCCGGC</u><br><u>ACCGCGCTCGACGAGCCCGCC</u><br><u>GCCGCCCCGGCCGGC</u> | putative MarR-family<br>transcriptional regulator        |
| 210 | <i>sav_2914</i> | <u>ACCGCAGGTGAGCCCCGTATCCGCC</u><br><u>GCCGCCCCCGGC</u>                                                                                                                                                              | putative transcriptional<br>regulator                    |
| 211 | <i>sav_2921</i> | <u>GCCGCTCGGCTGACTTCCAGCC</u><br><u>GCCGCCCGCC</u>                                                                                                                                                                   | putative two-component<br>system response regulator      |
| 212 | <i>sav_2955</i> | <u>ACCGCCAGGCAGGC</u><br><u>GCCGCCGCGCCGCCAGGC</u><br><u>GCCCGCCCGCCAGGC</u><br><u>GCCGCCGGGCAGGC</u><br><u>ACCGCACCCGAGGCGGGCCCGCC</u>                                                                              | putative TetR-family<br>transcriptional regulator        |
| 213 | <i>sav_3017</i> | <u>GCCGATGTGGACAGGC</u><br><u>GCCGCCCGCC</u>                                                                                                                                                                         | putative two-component<br>system sensor kinase           |
| 214 | <i>sav_3049</i> | <u>GCCGATCTTCGCCGGC</u><br><u>GCCGCTCCGCC</u><br><u>GCCGAAGGGTGCGCCGGC</u><br><u>ACCGAAGGGCGTGCGCCGGC</u>                                                                                                            | putative TetR-family<br>transcriptional regulator        |

|     |                 |                                                                                                                                 |                                                     |
|-----|-----------------|---------------------------------------------------------------------------------------------------------------------------------|-----------------------------------------------------|
| 215 | <i>sav_3070</i> | <u>GCCGCCACCCGGC</u>                                                                                                            | putative WhiB-family<br>transcriptional regulator   |
| 216 | <i>sav_3094</i> | <u>GCCGCAAGGCACTCATCGGC</u><br><u>GCCGCGCCGCC</u>                                                                               | putative TetR-family<br>transcriptional regulator   |
| 217 | <i>sav_3140</i> | <u>ACCGACAGCC</u>                                                                                                               | putative regulatory protein                         |
| 218 | <i>sav_3297</i> | <u>ACCGCCACCTTCGTGAAGCCGCC</u>                                                                                                  | putative regulatory protein                         |
| 219 | <i>sav_3338</i> | <u>ACCGCTCGCCGCGCCCGGC</u><br><u>GCCGCCGGGCGCCGCTCCCAGGC</u><br><u>GCCGCGCGCCGCGCGTCGGC</u><br><u>GCCGCAGGGCAGCC</u>            | putative LuxR-family<br>transcriptional regulator   |
| 220 | <i>sav_3339</i> | <u>ACCGAGCCGCC</u>                                                                                                              | putative DeoR-family<br>transcriptional regulator   |
| 221 | <i>sav_3424</i> | <u>ACCGCTCCGTCCTGCC</u>                                                                                                         | putative regulatory protein                         |
| 222 | <i>sav_3471</i> | <u>GCCGCCGCGGCCGCCCGGC</u><br><u>ACCGCTGATCGAACACTTCCCGCC</u>                                                                   | putative two-component<br>system sensor kinase      |
| 223 | <i>sav_3481</i> | <u>GCCGCAGGCCGGACCATCCACAGCC</u><br><u>GCCGCGGCTCTGTTCATCGGC</u><br><u>GCCGCCGGCTGTGGATGGTCCGGC</u><br><u>GCCGCGGCGTGGTCGGC</u> | putative two-component<br>system response regulator |
| 224 | <i>sav_3489</i> | <u>ACCGCAGTGCACGTATTGGC</u>                                                                                                     | putative anti-sigma factor<br>antagonist            |
| 225 | <i>sav_3537</i> | <u>ACCGCTCACCGCCCGGC</u><br><u>GCCGAACCGTTTATCCACAGGC</u><br><u>GCCGACAGCTGTTCCTTTGCCGGC</u><br><u>GCCGCTTCACTGCC</u>           | putative MazG-family<br>transcriptional regulator   |
| 226 | <i>sav_3560</i> | <u>GCCGCCCGTAGGC</u>                                                                                                            | putative two-component<br>system sensor kinase      |
| 227 | <i>sav_3572</i> | <u>GCCGCAGCCGCACGGCCGCCGCC</u>                                                                                                  | putative two-component<br>system response regulator |
| 228 | <i>sav_3631</i> | <u>GCCGACCCCGCC</u><br><u>ACCGATGGCACCCGGC</u><br><u>GCCGAAAGGTCCCTGGC</u><br><u>GCCGCTCCCGCC</u>                               | putative two-component<br>system sensor kinase      |
| 229 | <i>sav_3632</i> | <u>GCCGCTCCCGCC</u><br><u>GCCGAAAGGTCCCTGGC</u><br><u>ACCGATGGCACCCGGC</u><br><u>GCCGACCCCGCC</u>                               | putative regulatory protein                         |
| 230 | <i>sav_3667</i> | <u>GCCGCCACCGCCGCC</u><br><u>GCCGACGCACTCGCC</u>                                                                                | putative LuxR-family<br>transcriptional regulator   |
| 231 | <i>sav_3693</i> | <u>GCCGCGAGCCCGCAGCC</u><br><u>GCCGAGCTTCGGC</u><br><u>GCCGACGGTTCGGC</u><br><u>GCCGAAGCTCGGC</u><br><u>ACCGAAGCTCGGC</u>       | putative TetR-family<br>transcriptional regulator   |

|     |                 |                                                                                                                                                |                                                                                            |
|-----|-----------------|------------------------------------------------------------------------------------------------------------------------------------------------|--------------------------------------------------------------------------------------------|
| 232 | <i>sav_3697</i> | <u>GCCGCGTGCAGCC</u>                                                                                                                           | putative MarR-family<br>transcriptional regulator                                          |
| 233 | <i>sav_3701</i> | <u>GCCGCAGTCATGTCCGCCGCCGCC</u><br><u>GCCGAGCCCCCGTCCTCGCC</u><br><u>GCCGAGCCCTCCGCC</u><br><u>GCCGAGAGACGTACGCCGCC</u><br><u>GCCGCGCCCGCC</u> | putative IclR-family<br>transcriptional regulator                                          |
| 234 | <i>sav_3721</i> | <u>GCCGCTCGCC</u><br><u>GCCGAGCAGCC</u><br><u>ACCGCCCGTGAACAGGC</u>                                                                            | putative GntR-family<br>transcriptional regulator                                          |
| 235 | <i>sav_3837</i> | <u>GCCGACTCCAGGC</u><br><u>ACCGCCCGCC</u>                                                                                                      | putative regulatory protein                                                                |
| 236 | <i>sav_3843</i> | <u>GCCGCGGATGGTAGGGGCTCGGC</u>                                                                                                                 | putative anti-sigma factor<br>antagonist                                                   |
| 237 | <i>sav_3850</i> | <u>GCCGACTTCTTTTGTTCGTTCCGGC</u><br><u>GCCGCTGTCTGTTGCC</u>                                                                                    | putative transcriptional<br>regulator                                                      |
| 238 | <i>sav_3977</i> | <u>ACCGCATAGGATTGCC</u>                                                                                                                        | putative AraC-family<br>transcriptional regulator                                          |
| 239 | <i>sav_4003</i> | <u>GCCGCGCTTCGACACGAAGATCGCC</u>                                                                                                               | putative AraC-family<br>transcriptional regulator                                          |
| 240 | <i>sav_4015</i> | <u>ACCGCCTCCGCCTCCGCC</u>                                                                                                                      | putative MerR-family<br>transcriptional regulator                                          |
| 241 | <i>sav_4017</i> | <u>ACCGCGCGGGCCCGCC</u>                                                                                                                        | putative TetR-family<br>transcriptional regulator                                          |
| 242 | <i>sav_4023</i> | <u>GCCGACCGAGCTCCCGGC</u><br><u>ACCGCACAGCC</u>                                                                                                | putative GntR-family<br>transcriptional regulator                                          |
| 243 | <i>sav_4042</i> | <u>ACCGCAAGACGACCCTGGC</u>                                                                                                                     | putative two-component<br>system response regulator                                        |
| 244 | <i>sav_4110</i> | <u>GCCGCGCAGGGTTGGCCGAATTGCC</u>                                                                                                               | putative TetR-family<br>transcriptional regulator                                          |
| 245 | <i>sav_4111</i> | <u>GCCGAGACGGCCCGCAGCC</u>                                                                                                                     | putative transcriptional<br>regulator                                                      |
| 246 | <i>sav_4158</i> | <u>ACCGCGCCTCACAGCCACCGCC</u><br><u>ACCGCCCCACAACCGCGCCGCC</u><br><u>ACCGCGCCTCACAGCC</u><br><u>GCCGCGCCGCC</u>                                | putative two-component<br>system sensor kinase                                             |
| 247 | <i>sav_4193</i> | <u>ACCGCGCCCGCC</u>                                                                                                                            | putative TetR-family<br>transcriptional regulator                                          |
| 248 | <i>sav_4198</i> | <u>GCCGCACACGCCTTCCCAGCC</u>                                                                                                                   | putative two-component<br>system response regulator                                        |
| 249 | <i>sav_4205</i> | <u>GCCGCGAGCGCAACCACTGCC</u><br><u>GCCGATTGGC</u><br><u>ACCGCACCGTGCCCGCC</u><br><u>ACCGCAGAGGCCATCTTGCC</u>                                   | putative two-component<br>system sensor kinase/response<br>regulator, bifunctional protein |

|     |                 |                                                                                                                                       |                                                                                |
|-----|-----------------|---------------------------------------------------------------------------------------------------------------------------------------|--------------------------------------------------------------------------------|
| 250 | <i>sav_4254</i> | <u>GCCGCCGTCCGGC</u>                                                                                                                  | putative MerR-family<br>transcriptional regulator                              |
| 251 | <i>sav_4281</i> | <u>ACCGCGTTTGCATATAGCC</u>                                                                                                            | putative MarR-family<br>transcriptional regulator                              |
| 252 | <i>sav_4295</i> | <u>ACCGAAGTTCACCCAAATCAGGC</u><br><u>ACCGATTCTAGGAAGCAAGTTGCC</u>                                                                     | putative PadR-family<br>transcriptional regulator                              |
| 253 | <i>sav_4361</i> | <u>ACCGATTGTTCGGTCGTCGGC</u><br><u>GCCGCCCGCCCGCC</u>                                                                                 | putative AsnC-family<br>transcriptional regulator                              |
| 254 | <i>sav_4380</i> | <u>GCCGCCGCAGTGATCACTGCCGGC</u>                                                                                                       | putative GntR-family<br>transcriptional regulator                              |
| 255 | <i>sav_4398</i> | <u>ACCGCCCGCCAACCGCC</u>                                                                                                              | putative regulatory protein                                                    |
| 256 | <i>sav_4406</i> | <u>GCCGACTCGCC</u><br><u>GCCGCCGCACAGGC</u>                                                                                           | putative LysR-family<br>transcriptional regulator                              |
| 257 | <i>sav_4412</i> | <u>GCCGAGCCGGC</u><br><u>GCCGCGGGCACCCGGGCCGCC</u><br><u>GCCGCGGCCGGACTCCTCGCC</u><br><u>GCCGACTCGGC</u><br><u>GCCGAGTCGGCCGCCGGC</u> | putative transcriptional<br>regulator                                          |
| 258 | <i>sav_4416</i> | <u>GCCGCGCGGACCGCACCGCC</u>                                                                                                           | putative two-component<br>system response regulator                            |
| 259 | <i>sav_4448</i> | <u>GCCGCGCACAGAACGCCAGATTGCC</u>                                                                                                      | putative MarR-family<br>transcriptional regulator                              |
| 260 | <i>sav_4510</i> | <u>GCCGACAGGC</u><br><u>GCCGAAATCGCCGTTGACCGGC</u><br><u>ACCGCGCCCGGC</u><br><u>ACCGCAAGGTCCCCGGAGCAGCC</u>                           | putative LuxR-family<br>transcriptional regulator                              |
| 261 | <i>sav_4511</i> | <u>GCCGCTGCTCTTTCCGCC</u>                                                                                                             | putative LuxR-family<br>transcriptional regulator                              |
| 262 | <i>sav_4536</i> | <u>GCCGCCGGGCCGGTTGCC</u><br><u>GCCGCCTTCCGGAAGCTGCC</u><br><u>GCCGCTCCGGC</u>                                                        | putative two-component<br>system sensor kinase                                 |
| 263 | <i>sav_4542</i> | <u>GCCGCGCAGCTCGTCGAGGCAGGC</u><br><u>GCCGCGTCCGGC</u><br><u>ACCGCTTCCGCGTCCCGTCCGGC</u>                                              | putative MarR-family<br>transcriptional regulator                              |
| 264 | <i>sav_4550</i> | <u>GCCGACGCCGACAGCC</u>                                                                                                               | putative GntR-family<br>transcriptional regulator                              |
| 265 | <i>sav_4592</i> | <u>ACCGACATCCGCC</u><br><u>GCCGCACTGCC</u>                                                                                            | putative transcriptional<br>regulator with cyclic<br>nucleotide-binding domain |
| 266 | <i>sav_4647</i> | <u>GCCGACGCCGACCCCGCC</u>                                                                                                             | putative regulatory protein                                                    |
| 267 | <i>sav_4648</i> | <u>ACCGCGAAGTCTGCC</u>                                                                                                                | putative regulatory protein                                                    |
| 268 | <i>sav_4683</i> | <u>GCCGCCGCCGATTGACAGGC</u>                                                                                                           | putative ArsR-family<br>transcriptional regulator                              |
| 269 | <i>sav_4701</i> | <u>GCCGCTGACCGTGCCGGCCTCTGCC</u>                                                                                                      | putative TetR-family                                                           |

|     |                 |                                                                                                                                          |                                                                                |
|-----|-----------------|------------------------------------------------------------------------------------------------------------------------------------------|--------------------------------------------------------------------------------|
| 270 | <i>sav_4762</i> | <u>GCCGACCGGC</u><br><u>GCCGCGGCACGCCCTCCGCCCGGC</u><br><u>GCCGCCTCGGC</u><br><u>GCCGCGAGGGCGGCGCCGCC</u><br><u>GCCGCGAGGGGACTGCCGCC</u> | transcriptional regulator<br>putative AraC-family<br>transcriptional regulator |
| 271 | <i>sav_4782</i> | <u>GCCGCCACCCGGC</u>                                                                                                                     | putative TetR-family<br>transcriptional regulator                              |
| 272 | <i>sav_4783</i> | <u>ACCGCGCACACCCGGC</u>                                                                                                                  | putative regulatory protein                                                    |
| 273 | <i>sav_4787</i> | <u>ACCGCGTCCACCAACTCGGGCTGCC</u><br><u>ACCGCGCAGACCCGCACCTCTGCC</u><br><u>GCCGAAACCCGGC</u>                                              | putative anti-sigma factor<br>antagonist                                       |
| 274 | <i>sav_4790</i> | <u>GCCGAAGTCTCGGC</u><br><u>GCCGAGACTTCGGC</u>                                                                                           | putative LysR-family<br>transcriptional regulator                              |
| 275 | <i>sav_4816</i> | <u>GCCGAACGGCGTGGCGCTGTCGCC</u><br><u>GCCGACGGACCCGGC</u>                                                                                | putative TetR-family<br>transcriptional regulator                              |
| 276 | <i>sav_4857</i> | <u>ACCGCCGTTGGC</u><br><u>GCCGCTTCGCGGGGCGATCGCC</u>                                                                                     | putative GntR-family<br>transcriptional regulator                              |
| 277 | <i>sav_4878</i> | <u>ACCGCCCCACCCGGC</u><br><u>ACCGCCCCGGC</u><br><u>ACCGACCGACGCCCGCCCTGCC</u><br><u>ACCGATCAGCC</u><br><u>ACCGAAGATCCGTTATCGGC</u>       | putative two-component<br>system response regulator                            |
| 278 | <i>sav_4879</i> | <u>ACCGACACGGGCAGCC</u><br><u>GCCGACGCGCTCCATGGTCCGGC</u><br><u>ACCGCCCCACCCCGCCGCTCCGGC</u><br><u>GCCGCGCGCCCGCC</u>                    | putative two-component<br>system sensor kinase                                 |
| 279 | <i>sav_4880</i> | <u>GCCGCGGCTCGCCGCCAGGC</u>                                                                                                              | putative two-component<br>system sensor kinase                                 |
| 280 | <i>sav_4978</i> | <u>GCCGCCCTGTAACTTCCCGCC</u>                                                                                                             | putative LacI-family<br>transcriptional regulator                              |
| 281 | <i>sav_4983</i> | <u>ACCGCCGACGGGGTCCGCC</u><br><u>GCCGCCCCGTCCCGGC</u>                                                                                    | putative LacI-family<br>transcriptional regulator                              |
| 282 | <i>sav_5014</i> | <u>ACCGCCCTGCCTGCC</u><br><u>ACCGCCCCGGC</u>                                                                                             | putative regulatory protein                                                    |
| 283 | <i>sav_5030</i> | <u>GCCGCCCGGC</u>                                                                                                                        | putative transcriptional<br>regulator                                          |
| 284 | <i>sav_5032</i> | <u>GCCGATACATCCGGC</u>                                                                                                                   | putative transcriptional<br>regulator                                          |
| 285 | <i>sav_5033</i> | <u>ACCGCGCAGGTCCGCC</u><br><u>GCCGCGCCCGTTCAGCC</u>                                                                                      | putative transcriptional<br>regulator                                          |
| 286 | <i>sav_5034</i> | <u>ACCGCGGGTCCGTCCGGC</u><br><u>ACCGCGGGCCCGCC</u><br><u>GCCGACGGACCCGCGGTTCGCC</u><br><u>GCCGAACGGGTGAATCCCCGGC</u>                     | putative transcriptional<br>regulator                                          |

|     |                 |                                                                                                                   |                                                                                |
|-----|-----------------|-------------------------------------------------------------------------------------------------------------------|--------------------------------------------------------------------------------|
| 287 | <i>sav_5068</i> | <u>GCCGCACCGGC</u><br><u>ACCGATCCAGTTGTCAGCCGGC</u>                                                               | putative two-component<br>system response regulator                            |
| 288 | <i>sav_5084</i> | <u>GCCGACAACAATGTTGGC</u><br><u>GCCGCAGTGATCGGC</u>                                                               | putative TetR-family<br>transcriptional regulator                              |
| 289 | <i>sav_5220</i> | <u>GCCGCCCCGGCCCCGCCCTGCC</u>                                                                                     | putative GntR-family<br>transcriptional regulator                              |
| 290 | <i>sav_5311</i> | <u>GCCGAACCGCCCCGTCCGACCGCC</u><br><u>ACCGCTCACGTACCGGC</u><br><u>ACCGCTCACGTACCGGC</u><br><u>ACCGCTTCGGC</u>     | putative<br>acetyltransferase/MarR-family<br>transcriptional regulator         |
| 291 | <i>sav_5336</i> | <u>GCCGCGCCGTATCCGGCCCCGCCGGC</u><br><u>ACCGAGTGTGACCCGGGACCCGCC</u>                                              | putative MarR-family<br>transcriptional regulator                              |
| 292 | <i>sav_5384</i> | <u>GCCGCCTCTCGGC</u><br><u>GCCGAGCGCGTCTGCC</u><br><u>GCCGCGGGCTGCC</u>                                           | putative ROK-family<br>transcriptional regulator                               |
| 293 | <i>sav_5522</i> | <u>GCCGCCGACAGCC</u>                                                                                              | putative cell-cycle regulator                                                  |
| 294 | <i>sav_5564</i> | <u>ACCGAAGTGGGCCGCC</u>                                                                                           | putative two-component<br>system sensor kinase                                 |
| 295 | <i>sav_5579</i> | <u>ACCGACCGTCAATGGCGCCTCGCC</u>                                                                                   | putative IclR-family<br>transcriptional regulator                              |
| 296 | <i>sav_5623</i> | <u>GCCGCCCCGCC</u><br><u>ACCGCCGTCACCGCCGCC</u>                                                                   | putative two-component<br>system sensor kinase                                 |
| 297 | <i>sav_5644</i> | <u>GCCGCCCATATGTCGGGTCGCC</u><br><u>ACCGCCCATCCCGGCCGGC</u>                                                       | putative MarR-family<br>transcriptional regulator                              |
| 298 | <i>sav_5653</i> | <u>GCCGAACCGCCTGGC</u>                                                                                            | putative ROK-family<br>transcriptional regulator                               |
| 299 | <i>sav_5700</i> | <u>GCCGAGGCGGCCCGGC</u><br><u>GCCGCCACCGGGCACCGTCCCGCC</u><br><u>GCCGCCTCGGC</u><br><u>GCCGAGAAGACTCGCCGCCGGC</u> | putative transcriptional<br>regulator with cyclic<br>nucleotide-binding domain |
| 300 | <i>sav_5701</i> | <u>GCCGCGGCCCTCGGC</u>                                                                                            | putative LacI-family<br>transcriptional regulator                              |
| 301 | <i>sav_5719</i> | <u>GCCGCGCCCCGACCCCGGTCCCGCC</u>                                                                                  | putative two-component<br>system sensor kinase                                 |
| 302 | <i>sav_5724</i> | <u>GCCGCCTGCC</u><br><u>GCCGCGGAAGCGCCCCGC</u>                                                                    | putative TetR-family<br>transcriptional regulator                              |
| 303 | <i>sav_5740</i> | <u>ACCGACTCCAGGAGCAGCC</u>                                                                                        | putative regulatory protein                                                    |
| 304 | <i>sav_5741</i> | <u>GCCGACAGCC</u><br><u>GCCGACAGCC</u><br><u>ACCGCAGGGCCATTGCCCGGC</u><br><u>ACCGCATACCTCTGACGGTCCGGC</u>         | putative IclR-family<br>transcriptional regulator                              |
| 305 | <i>sav_5746</i> | <u>GCCGCTCTTCTGCC</u><br><u>GCCGCCCCGTTGTGCGACGCCCGCC</u>                                                         | putative two-component<br>system sensor kinase                                 |
| 306 | <i>sav_5757</i> | <u>ACCGAGCGCGGGTGCCGGC</u>                                                                                        | putative transcriptional                                                       |



|     |                 |                                                                                                                                      |                                                                |
|-----|-----------------|--------------------------------------------------------------------------------------------------------------------------------------|----------------------------------------------------------------|
| 307 | <i>sav_5792</i> | <u>GCCGCGCTCGGTCTGGCGCTTCGGC</u><br><u>GCCGCATCGAGGGGTCGGGCTCGCC</u><br><u>GCCGCGGGCAGTCTCCGCC</u><br><u>GCCGCCCTGTCCGCCACTTAGGC</u> | regulator<br>putative MerR-family<br>transcriptional regulator |
| 308 | <i>sav_5854</i> | <u>ACCGCTCACACCGGCGCTACCTGCC</u>                                                                                                     | putative TetR-family<br>transcriptional regulator              |
| 309 | <i>sav_5869</i> | <u>GCCGCCCCGCCTCCCGGC</u>                                                                                                            | putative two-component<br>system sensor kinase                 |
| 310 | <i>sav_5881</i> | <u>GCCGCGGGATGTGGGCGGGCCGGC</u>                                                                                                      | putative AraC-family<br>transcriptional regulator              |
| 311 | <i>sav_5945</i> | <u>GCCGCTGCCGGGCACCCGCC</u>                                                                                                          | putative TetR-family<br>transcriptional regulator              |
| 312 | <i>sav_5985</i> | <u>ACCGATCGAATCCAGCC</u>                                                                                                             | putative TetR-family<br>transcriptional regulator              |
| 313 | <i>sav_5992</i> | <u>ACCGAGCGGCCGCC</u>                                                                                                                | putative two-component<br>system sensor kinase                 |
| 314 | <i>sav_6011</i> | <u>GCCGATGTCCGTCAGCC</u><br><u>GCCGCGTGCCCGGATCGCC</u>                                                                               | putative regulatory protein                                    |
| 315 | <i>sav_6021</i> | <u>ACCGAGGGACACCTGCC</u>                                                                                                             | putative GntR-family<br>transcriptional regulator              |
| 316 | <i>sav_6038</i> | <u>GCCGCGATTCCGGC</u><br><u>ACCGCCCGCATCAGCCCGGC</u><br><u>ACCGCGGCCGGC</u><br><u>GCCGACGTCGCGCCTGCC</u>                             | putative two-component<br>system sensor kinase                 |
| 317 | <i>sav_6161</i> | <u>GCCGCGCCGCGTCGGC</u>                                                                                                              | putative ArsR-family<br>transcriptional regulator              |
| 318 | <i>sav_6163</i> | <u>GCCGCTGGCCGCATCGCCGCTCGCC</u><br><u>GCCGCCCCGC</u><br><u>GCCGCGTACGGTCCGGTCGGC</u><br><u>GCCGACTGGC</u>                           | putative regulatory protein                                    |
| 319 | <i>sav_6219</i> | <u>ACCGCAGCTAGGTAGGC</u>                                                                                                             | putative two-component<br>system response regulator            |
| 320 | <i>sav_6252</i> | <u>GCCGCGAACACTTGGC</u>                                                                                                              | putative regulatory protein                                    |
| 321 | <i>sav_6288</i> | <u>GCCGAATGAGATACGTTCCCGGC</u><br><u>GCCGACTCTGGCCGGC</u>                                                                            | putative LacI-family<br>transcriptional regulator              |
| 322 | <i>sav_6324</i> | <u>ACCGCCCCGC</u>                                                                                                                    | putative ArsR-family<br>transcriptional regulator              |
| 323 | <i>sav_6358</i> | <u>ACCGAACGGGCCCGCCCGCC</u>                                                                                                          | putative DeoR-family<br>transcriptional regulator              |
| 324 | <i>sav_6476</i> | <u>GCCGACCCCGCCGCC</u>                                                                                                               | putative two-component<br>system sensor kinase                 |
| 325 | <i>sav_6536</i> | <u>GCCGCTGTCCGCAAGCGCTGGC</u>                                                                                                        | putative DeoR-family<br>transcriptional regulator              |
| 326 | <i>sav_6598</i> | <u>GCCGCCCTGGCCCTGGC</u>                                                                                                             | putative ArsR-family                                           |

|     |                 |                                                                                                                                  |                                                                                |
|-----|-----------------|----------------------------------------------------------------------------------------------------------------------------------|--------------------------------------------------------------------------------|
| 327 | <i>sav_6701</i> | <u>GCCGAGTTC</u> <u>CCGCCGCCGGC</u><br><u>ACCGACCCGACCCGCC</u><br><u>ACCGACCCGGC</u>                                             | transcriptional regulator<br>putative TetR-family<br>transcriptional regulator |
| 328 | <i>sav_6724</i> | <u>GCCGAGAGCCATAAGGTATTGCC</u>                                                                                                   | putative GntR-family<br>transcriptional regulator                              |
| 329 | <i>sav_6745</i> | <u>GCCGACCCGCC</u><br><u>ACCGACGCCCCAGCC</u><br><u>ACCGCGCCGTCCGCCCGGCTGCC</u><br><u>GCCGACAGAGTAGTGCGTCCGCC</u>                 | putative transcriptional<br>regulator                                          |
| 330 | <i>sav_6758</i> | <u>GCCGACTGACGCCGACAGGC</u><br><u>ACCGCACCGCCGCGGCGAACCCGGC</u>                                                                  | putative MerR-family<br>transcriptional regulator                              |
| 331 | <i>sav_6889</i> | <u>ACCGAGCCGGTGTACCCAGGC</u><br><u>ACCGCAATGGTTGCC</u>                                                                           | putative sensor-like histidine<br>kinase                                       |
| 332 | <i>sav_6901</i> | <u>GCCGCTGTGCCGCC</u>                                                                                                            | putative ROK-family<br>transcriptional regulator                               |
| 333 | <i>sav_6917</i> | <u>ACCGCGTCCGGTTCGCC</u><br><u>GCCGATGTCCCGCTGGC</u>                                                                             | putative TetR-family<br>transcriptional regulator                              |
| 334 | <i>sav_6921</i> | <u>GCCGCAGTGCCCTGTTCGGCCAGCC</u><br><u>GCCGACGGCCGGCTGCCGGCCGCC</u>                                                              | putative AsnC-family<br>transcriptional regulator                              |
| 335 | <i>sav_6954</i> | <u>ACCGCACGTCCCTGACTGCC</u>                                                                                                      | putative IclR-family<br>transcriptional regulator                              |
| 336 | <i>sav_6994</i> | <u>GCCGCCCGCGGTCGCCGGC</u><br><u>GCCGCGTGCCCCCGCGTCTCGGC</u><br><u>ACCGCCCGCC</u><br><u>ACCGCCCTGGC</u><br><u>ACCGCCTGTCAGCC</u> | putative PadR-family<br>transcriptional regulator                              |
| 337 | <i>sav_7025</i> | <u>ACCGATTGGTCCCTGGC</u>                                                                                                         | putative transcriptional<br>regulator                                          |
| 338 | <i>sav_7044</i> | <u>ACCGCGTCCACTCCCCGCCGGC</u>                                                                                                    | putative ArsR-family<br>transcriptional regulator                              |
| 339 | <i>sav_7061</i> | <u>GCCGCTGTTCAGGCTTCCGGC</u>                                                                                                     | putative AsnC-family<br>transcriptional regulator                              |
| 340 | <i>sav_7070</i> | <u>GCCGCGCCGAGTACGATCCGGC</u><br><u>GCCGCCGGGCCGCC</u>                                                                           | putative ROK-family<br>transcriptional regulator                               |
| 341 | <i>sav_7097</i> | <u>GCCGACTCCTTTCGCC</u><br><u>ACCGAGGCCGCC</u>                                                                                   | putative regulatory protein                                                    |
| 342 | <i>sav_7178</i> | <u>GCCGCATCGCCGCCGATCGCC</u>                                                                                                     | putative transcriptional<br>regulator                                          |
| 343 | <i>sav_7235</i> | <u>GCCGCCCGCGCCCCGCCGGC</u><br><u>GCCGCTGAGCCGTCCACCCGCC</u>                                                                     | putative LysR-family<br>transcriptional regulator                              |
| 344 | <i>sav_7331</i> | <u>ACCGCACCCGAAGAACGCCGGC</u>                                                                                                    | putative LuxR-family<br>transcriptional regulator                              |
| 345 | <i>sav_7346</i> | <u>ACCGAACGGTAACCGCCCGGC</u>                                                                                                     | putative LacI-family<br>transcriptional regulator                              |

|                                  |                 |              |                                                                                                                                                   |                                                   |
|----------------------------------|-----------------|--------------|---------------------------------------------------------------------------------------------------------------------------------------------------|---------------------------------------------------|
| 346                              | <i>sav_7354</i> |              | <u>GCCGATCCGGC</u>                                                                                                                                | putative MarR-family<br>transcriptional regulator |
| 347                              | <i>sav_7422</i> |              | <u>GCCGCGCCGGC</u>                                                                                                                                | putative LacI-family<br>transcriptional regulator |
| 348                              | <i>sav_7452</i> |              | <u>GCCGAGGGGAGCCGTTCCGGC</u><br><u>GCCGATCAGTTCGGCC</u><br><u>GCCGACGGCTCCCCTCGGC</u>                                                             | putative anti-sigma factor<br>antagonist          |
| 349                              | <i>sav_7510</i> |              | <u>GCCGATGTGTTCGCC</u>                                                                                                                            | putative TetR-family<br>transcriptional regulator |
| 350                              | <i>sav_7514</i> |              | <u>ACCGCTGGCAAGATCTGCC</u>                                                                                                                        | putative WhiB-family<br>transcriptional regulator |
| <b>Secondary metabolism (84)</b> |                 |              |                                                                                                                                                   |                                                   |
| 351                              | <i>sav_936</i>  | <i>aveF</i>  | <u>GCCGCGCGGGACGTCTCCGCC</u><br><u>GCCGCCGCACCGGC</u><br><u>ACCGCCACGGCGGCCGCC</u><br><u>ACCGCCGCCATCATGACCGCC</u><br><u>GCCGACGCCATGGATCCGGC</u> | C-5 ketoreductase                                 |
| 352                              | <i>sav_937</i>  | <i>aveD</i>  | <u>ACCGCTAGGCAATGCTCGGC</u><br><u>GCCGCCCCGGC</u><br><u>GCCGCCGAGCATTGCC</u>                                                                      | C5-O-methyltransferase                            |
| 353                              | <i>sav_938</i>  | <i>aveA1</i> | <u>GCCGCCGAGCATTGCC</u><br><u>GCCGCCCCGGC</u><br><u>ACCGCTAGGCAATGCTCGGC</u>                                                                      | type I polyketide synthase<br>AVES 1              |
| 354                              | <i>sav_942</i>  | <i>aveA3</i> | <u>GCCGACTGGCCGACCGGC</u>                                                                                                                         | type I polyketide synthase<br>AVES 3              |
| 355                              | <i>sav_943</i>  | <i>aveA4</i> | <u>GCCGATCCGAGAGCGCAGGC</u><br><u>ACCGCCTGCGCTCTCGGATCGGC</u>                                                                                     | type I polyketide synthase<br>AVES 4              |
| 356                              | <i>sav_944</i>  | <i>orf-1</i> | <u>ACCGCCTGCGCTCTCGGATCGGC</u><br><u>GCCGATCCGAGAGCGCAGGC</u>                                                                                     | reductase                                         |
| 357                              | <i>sav_2892</i> | <i>olmA4</i> | <u>GCCGAATGCTAGGC</u><br><u>GCCCGTCCCCCTAGCC</u>                                                                                                  | modular polyketide synthase                       |
| 358                              | <i>sav_2899</i> | <i>olmA1</i> | <u>ACCGCCCCCTAGCC</u><br><u>ACCGCTATCGGC</u>                                                                                                      | modular polyketide synthase                       |
| 359                              | <i>sav_2900</i> |              | <u>GCCGAATCGGC</u><br><u>GCCGACGAAGTCGCGGGCGCCGGC</u><br><u>GCCGCCACACGGGTCACCACCGCC</u><br><u>GCCGCCCCCTAGCC</u><br><u>GCCGATTCGGC</u>           | putative P450-like protein                        |
| 360                              | <i>sav_2902</i> | <i>olmRI</i> | <u>ACCGAGAAATGTCACAGCC</u><br><u>ACCGCAACCGCGCAGGC</u>                                                                                            | LuxR-family transcriptional<br>regulator          |
| 361                              | <i>sav_2903</i> | <i>olmC</i>  | <u>GCCGACGGGTCACAGCC</u><br><u>GCCGCCGCGACCCGGC</u>                                                                                               | thioesterase                                      |
| 362                              | <i>sav_840</i>  |              | <u>ACCGCGTGTCTCGGCGCCCTCGCC</u><br><u>GCCGAGCACGCGGTGCGGGCCGCC</u>                                                                                | putative thioesterase                             |

|     |                 |                 |                                                                                                                                                                                    |                                                                                 |
|-----|-----------------|-----------------|------------------------------------------------------------------------------------------------------------------------------------------------------------------------------------|---------------------------------------------------------------------------------|
| 363 | <i>sav_849</i>  |                 | <u>ACCGCTGCGTCCAGGGCGTCGCC</u><br><u>GCCGCCAGCGCAGCGGGTGCCGGC</u><br><u>GCCGCCACCGGC</u><br><u>ACCGGTGGCCACCGCC</u><br><u>GCCGACCGGC</u>                                           | putative methyltransferase                                                      |
| 364 | <i>sav_851</i>  |                 | <u>GCCGCCGACACCGGC</u><br><u>GCCGCCAGGC</u>                                                                                                                                        | putative MbtH-like protein                                                      |
| 365 | <i>sav_856</i>  |                 | <u>GCCGACGCACGACCGCC</u><br><u>ACCGCGGCGATCGCTCCCTTGGC</u><br><u>ACCGCCTACGTCCGGGCCGCCCGGC</u><br><u>ACCGCACGCCTCGCC</u>                                                           | putative thioesterase                                                           |
| 366 | <i>sav_857</i>  | <i>nrps7-9</i>  | <u>GCCGCCACCGTAGGC</u>                                                                                                                                                             | putative non-ribosomal peptide synthetase                                       |
| 367 | <i>sav_859</i>  | <i>nrps7-10</i> | <u>GCCGCGAGGTCGGC</u>                                                                                                                                                              | putative non-ribosomal peptide synthetase                                       |
| 368 | <i>sav_865</i>  | <i>nrps7-12</i> | <u>ACCGACACCGGTCGGC</u>                                                                                                                                                            | putative non-ribosomal peptide synthetase                                       |
| 369 | <i>sav_1019</i> | <i>crtU</i>     | <u>GCCGCACGTGCGGGCAGGGACCGGC</u><br><u>GCCGCGACGTGCGGGCGCCGGC</u>                                                                                                                  | beta-carotene desaturase/methylase                                              |
| 370 | <i>sav_1021</i> | <i>crtY</i>     | <u>GCCGCCGCACCGGGCCGGC</u><br><u>GCCGCCGGAGTCAGCC</u><br><u>GCCGCCACCACCCCGTCCCGGC</u><br><u>GCCGCCACCATCCCGTCGGC</u><br><u>GCCGCCACCACCCCGTCGGC</u><br><u>GCCGAACGACCCGGCCGGC</u> | lycopene cyclase                                                                |
| 371 | <i>sav_1022</i> | <i>crtE</i>     | <u>GCCGAACGACCCGGCCGGC</u><br><u>GCCGCCACCACCCCGTCGGC</u><br><u>GCCGCCACCATCCCGTCGGC</u><br><u>GCCGCCACCACCCCGTCCCGGC</u><br><u>GCCGCCGGAGTCAGCC</u><br><u>GCCGCCGACCCGGGCCGGC</u> | geranylgeranyl diphosphate synthase                                             |
| 372 | <i>sav_1249</i> |                 | <u>GCCGCGGGCGTCCCGCC</u><br><u>GCCGCACCCGCCCGCC</u><br><u>GCCGCGATGCCGCC</u>                                                                                                       | putative modular polyketide synthase                                            |
| 373 | <i>sav_1251</i> |                 | <u>GCCGAACCGCC</u>                                                                                                                                                                 | putative hydroxylase                                                            |
| 374 | <i>sav_3199</i> | <i>nrps1-3</i>  | <u>GCCGCCGACCCAGGCCGCCCGCC</u><br><u>ACCGATGCCCGTGCGGCCGGC</u>                                                                                                                     | putative non-ribosomal peptide synthetase                                       |
| 375 | <i>sav_3648</i> | <i>cysK2</i>    | <u>GCCGCCCGGCCCTGCC</u>                                                                                                                                                            | putative cysteine synthase                                                      |
| 376 | <i>sav_3651</i> | <i>nrps2-4</i>  | <u>GCCGCATCCCCGGCCGCC</u><br><u>ACCGCACAAACGGCCGCC</u><br><u>GCCGCCCGGCCCGGC</u>                                                                                                   | putative non-ribosomal peptide synthetase/acyl-CoA dehydrogenase fusion protein |
| 377 | <i>sav_6633</i> | <i>nrps5</i>    | <u>GCCGCCGACCAGCACGTCAGCC</u>                                                                                                                                                      | putative non-ribosomal peptide synthetase                                       |
| 378 | <i>sav_3644</i> |                 | <u>ACCGATCACCGACCAAGGAGTTGCC</u>                                                                                                                                                   | putative MbtH-like protein                                                      |

|     |                 |                |                                                                                                           |                                                 |
|-----|-----------------|----------------|-----------------------------------------------------------------------------------------------------------|-------------------------------------------------|
| 379 | <i>sav_7161</i> |                | <u>ACCGCTGGTACGCGCGGTCGGC</u>                                                                             | putative regulatory protein                     |
| 380 | <i>sav_7165</i> | <i>nrps4</i>   | <u>GCCGATCGCC</u><br><u>GCCGCTCGTCGCCGTCCCGTCGGC</u><br><u>GCCGCGAGGACTGCC</u><br><u>GCCGCCGACGCCTGCC</u> | putative non-ribosomal peptide synthetase       |
| 381 | <i>sav_1551</i> | <i>pks2-2</i>  | <u>GCCGCCGTCGTACCGGC</u><br><u>ACCGCTTCAGCCGACCGGC</u><br><u>ACCGCCGCCGGC</u><br><u>GCCGACGCCGGTCCGGC</u> | putative modular polyketide synthase            |
| 382 | <i>sav_1552</i> | <i>pks2-3</i>  | <u>GCCGACCTGGCCCCCTTGCC</u>                                                                               | putative non-ribosomal peptide synthetase       |
| 383 | <i>sav_1553</i> |                | <u>GCCGACCTGGCCCCCTTGCC</u>                                                                               | putative methyltransferase                      |
| 384 | <i>sav_2276</i> | <i>fabH7</i>   | <u>ACCGCCTCCGGCACCGGCCGCC</u><br><u>ACCGCCC GGCCGCC</u>                                                   | putative 3-oxoacyl-ACP synthase III             |
| 385 | <i>sav_2281</i> | <i>pks3-2</i>  | <u>ACCGACCAGGC</u>                                                                                        | putative modular polyketide synthase            |
| 386 | <i>sav_2282</i> | <i>pks3-3</i>  | <u>GCCGCGGCCGGGGCCTGGC</u>                                                                                | putative acyl carrier protein                   |
| 387 | <i>sav_2366</i> |                | <u>GCCGCAATGTCGCTGCCGGC</u><br><u>GCCGACGGCCAGCAGGCCGGC</u>                                               | putative hydroxylase                            |
| 388 | <i>sav_2368</i> | <i>pks5</i>    | <u>GCCGATCCCTTTGCCGGGCAGGC</u>                                                                            | putative modular polyketide synthase            |
| 389 | <i>sav_2369</i> |                | <u>GCCGATCCCTTTGCCGGGCAGGC</u>                                                                            | putative regulatory protein                     |
| 390 | <i>sav_2377</i> | <i>cyp10</i>   | <u>GCCGCATGCTGTCTCGGC</u><br><u>ACCGCTGCCGCGAGCATCGGC</u>                                                 | putative cytochrome P450                        |
| 391 | <i>sav_2382</i> |                | <u>GCCGCACCGGC</u><br><u>ACCGCCC GGCC</u>                                                                 | putative O-methyltransferase                    |
| 392 | <i>sav_2386</i> |                | <u>GCCGCCGCGCTCATCGGC</u>                                                                                 | putative ClpX homolog                           |
| 393 | <i>sav_2387</i> | <i>pks9-7</i>  | <u>ACCGCGCCGCGCCGGCCAGCCGGC</u><br><u>GCCGCCATCGCACCCGGGTAGGC</u>                                         | putative 3-oxoacyl-ACP reductase                |
| 394 | <i>sav_3657</i> | <i>pks8-2</i>  | <u>GCCGAGACCTTCGCC</u>                                                                                    | putative 3-oxoacyl-ACP synthase I               |
| 395 | <i>sav_3662</i> |                | <u>GCCGCCACCCGGCCGCCACCGCC</u>                                                                            | putative hydrolase                              |
| 396 | <i>sav_3666</i> | <i>pks8-9</i>  | <u>GCCGCGTATAGCAGGC</u>                                                                                   | putative acyl carrier protein                   |
| 397 | <i>sav_7184</i> | <i>pks4</i>    | <u>ACCGACCCGAGCC</u><br><u>GCCGACCCCTGGACGGGGCCGCC</u>                                                    | putative modular polyketide synthase            |
| 398 | <i>sav_7185</i> |                | <u>GCCGCCGCTGCGGGTTGTCGGC</u>                                                                             | putative UDP-glucose:sterol glucosyltransferase |
| 399 | <i>sav_7360</i> | <i>pks1-1</i>  | <u>ACCGCGGTCCGGC</u>                                                                                      | putative acyl carrier protein                   |
| 400 | <i>sav_7362</i> | <i>pks1-3</i>  | <u>ACCGCCCTCGGGTCAGGC</u><br><u>GCCGCGCGCGTCTCCGCC</u>                                                    | putative modular polyketide synthase            |
| 401 | <i>sav_1136</i> | <i>melC1</i>   | <u>GCCGCACCACTCGCC</u><br><u>GCCGCCCCGGGTGGCCACCCGGC</u>                                                  | tyrosinase co-factor protein                    |
| 402 | <i>sav_5361</i> | <i>melC1-2</i> | <u>GCCGCCGACCTGCCGCC</u><br><u>ACCGAAGGAGGCCGGTCCCTCCGCC</u>                                              | putative tyrosinase co-factor protein           |

|     |                 |              |                                                                                                                                                                                      |                                                                                                       |
|-----|-----------------|--------------|--------------------------------------------------------------------------------------------------------------------------------------------------------------------------------------|-------------------------------------------------------------------------------------------------------|
|     |                 |              | <u>ACCGCAGGCCCGGC</u>                                                                                                                                                                |                                                                                                       |
|     |                 |              | <u>GCCGCTGTGTTCACCGCC</u>                                                                                                                                                            |                                                                                                       |
|     |                 |              | <u>GCCGCGGACACATGGAGTCGGC</u>                                                                                                                                                        |                                                                                                       |
| 403 | <i>sav_2835</i> | <i>sppF</i>  | <u>GCCGATCGCC</u>                                                                                                                                                                    | putative polyketide<br>hydroxylase                                                                    |
| 404 | <i>sav_2836</i> | <i>sppG</i>  | <u>GCCGATCGCC</u>                                                                                                                                                                    | putative WhiE I homolog                                                                               |
| 405 | <i>sav_2837</i> | <i>sppH</i>  | <u>GCCGACGGCGTAGTGCGCGTCCGGC</u>                                                                                                                                                     | putative WhiE II homolog                                                                              |
| 406 | <i>sav_2842</i> | <i>sppE</i>  | <u>GCCGCGGACCGCC</u>                                                                                                                                                                 | putative cyclase II                                                                                   |
| 407 | <i>sav_5274</i> | <i>sidF</i>  | <u>GCCGCGGGGCGCCCGCC</u><br><u>GCCGCACCTGTGAGCAGCC</u>                                                                                                                               | iron(III)/siderophore uptake<br>ABC transporter<br>substrate-binding protein                          |
| 408 | <i>sav_5689</i> | <i>mcjC2</i> | <u>ACCGACCGGGAGGACGCGACCGCC</u><br><u>GCCGATTCACCTGCC</u><br><u>ACCGCCCTCCTGGCCGGC</u>                                                                                               | putative asparagine synthase                                                                          |
| 409 | <i>sav_7584</i> | <i>mcjA1</i> | <u>ACCGAGTGAGTCTCCTCACCGGC</u>                                                                                                                                                       | putative microcin mature<br>peptide                                                                   |
| 410 | <i>sav_76</i>   | <i>ams</i>   | <u>GCCGCGTTCTCCCGGC</u><br><u>GCCGAGAAGGCCGCAATTGCCGCC</u><br><u>GCCGCGGGGCGGGTCGGC</u><br><u>GCCGCCCGGCCGGCTGCGTCTGCC</u><br><u>GCCGACCCGCCCGGC</u><br><u>GCCGCGACGGCGCGTGCCGGC</u> | avermilol synthase<br>(sesquiterpene cyclase)                                                         |
| 411 | <i>sav_1650</i> | <i>hopA</i>  | <u>GCCGCGAGCAGAGAGAAGCACTGGC</u>                                                                                                                                                     | squalene-hopene cyclase                                                                               |
| 412 | <i>sav_1652</i> | <i>hopC</i>  | <u>ACCGCGGCGGACCGGC</u><br><u>GCCGCTGGAATCACCTTGGC</u>                                                                                                                               | squalene/phytoene<br>dehydrogenase                                                                    |
| 413 | <i>sav_1654</i> | <i>hopE</i>  | <u>GCCGAAGCGTTCCGGC</u><br><u>ACCGATTGGC</u>                                                                                                                                         | squalene/phytoene synthase                                                                            |
| 414 | <i>sav_2163</i> | <i>geoA</i>  | <u>GCCGCAGTCCGCGCCTGCCTGCC</u>                                                                                                                                                       | germacradienol/geosmin<br>synthase                                                                    |
| 415 | <i>sav_2989</i> | <i>ptlR</i>  | <u>ACCGACAACGCCCGGC</u>                                                                                                                                                              | putative MarR-family<br>transcriptional regulator                                                     |
| 416 | <i>sav_2991</i> | <i>ptlH</i>  | <u>GCCGATATCAGCCGCCGGC</u><br><u>GCCGCACACATGCGGAGTCCGGC</u><br><u>GCCGCGCCCATGTGTGATGACCGGC</u><br><u>GCCGACTGGC</u>                                                                | 1-deoxypentalenic acid 11-beta<br>hydroxylase;<br>Fe(II)/alpha-ketoglutarate<br>dependent hydroxylase |
| 417 | <i>sav_2993</i> | <i>ptlF</i>  | <u>GCCGCTGCCCGAGCCGCGCCGGC</u><br><u>ACCGCTCGCC</u>                                                                                                                                  | 1-deoxy-11beta-hydroxypental<br>enic acid dehydrogenase                                               |
| 418 | <i>sav_2996</i> | <i>ptlC</i>  | <u>ACCGCCTCGGC</u><br><u>GCCGACCTGGC</u>                                                                                                                                             | hypothetical protein                                                                                  |
| 419 | <i>sav_2998</i> | <i>ptlA</i>  | <u>GCCGCCCGCC</u><br><u>ACCGCAGGCAGCGCCGCC</u><br><u>ACCGCCCTCCCCACCGCAGGC</u><br><u>GCCGCTGCTCCCGGC</u><br><u>ACCGCTCAGGCCGCC</u>                                                   | pentalenene synthase                                                                                  |

|     |                 |              |                                                                                                                                                                    |                                                                        |
|-----|-----------------|--------------|--------------------------------------------------------------------------------------------------------------------------------------------------------------------|------------------------------------------------------------------------|
|     |                 |              | <u>GCCGCGCCCCGGCCCCGGCCGGC</u>                                                                                                                                     |                                                                        |
|     |                 |              | <u>GCCGAGCCGGC</u>                                                                                                                                                 |                                                                        |
| 420 | <i>sav_3032</i> | <i>ezs</i>   | <u>ACCGCTTTTTCTGGC</u>                                                                                                                                             | epi-isozizaene synthase<br>(sesquiterpene cyclase)                     |
| 421 | <i>sav_408</i>  | <i>pteG</i>  | <u>GCCGCTCACGCAGTGCCCGGC</u><br><u>GCCGCGTCTTCCCCTGCCCGGC</u><br><u>ACCGAACCCCCGGGCCGGC</u><br><u>ACCGCATGGAGACCGCGCACAGGC</u>                                     | putative cholesterol oxidase                                           |
| 422 | <i>sav_409</i>  | <i>pteF</i>  | <u>GCCGCTCGGC</u><br><u>ACCGCGAACGCGTCAGCC</u><br><u>GCCGAACACCTGCCGCTTCTTGCC</u><br><u>GCCGCTGGCGACCCCTTGCC</u>                                                   | putative LuxR-family<br>transcriptional regulator                      |
| 423 | <i>sav_410</i>  | <i>pteR</i>  | <u>ACCGCGAACGCGTCAGCC</u><br><u>GCCGCTCGGCCCCGCCACGCCGGC</u>                                                                                                       | DnrI/RedD/AfsR-family<br>transcriptional regulator                     |
| 424 | <i>sav_412</i>  | <i>pteD</i>  | <u>GCCGCGTGGCCCTCCCGCC</u><br><u>GCCGCGACCCTCGCACCGACTGCC</u><br><u>GCCGCTTGCC</u><br><u>ACCGAGGCCGCC</u><br><u>ACCGAACCTGTTTCCCCTAGCC</u><br><u>ACCGCGCGCCGGC</u> | cytochrome P450 hydroxylase                                            |
| 425 | <i>sav_419</i>  | <i>pteA1</i> | <u>GCCGCTGGTGCAGCCGATCGCC</u><br><u>GCCGAGAATCACTACCGACCTCGCC</u><br><u>GCCGCTACACGGGCGATCGGC</u>                                                                  | modular polyketide synthase                                            |
| 426 | <i>sav_7320</i> | <i>avsA</i>  | <u>GCCGCGTCGAGCGGATGCCCGCC</u><br><u>GCCGAGGCCACCGGC</u>                                                                                                           | putative siderophore synthetase<br>component                           |
| 427 | <i>sav_7322</i> | <i>avsC</i>  | <u>GCCGCGACCGCC</u>                                                                                                                                                | putative siderophore synthetase<br>component                           |
| 428 | <i>sav_1457</i> | <i>axe2</i>  | <u>ACCGATAATTTCCGGC</u>                                                                                                                                            | putative acetyl xylan esterase                                         |
| 429 | <i>sav_2563</i> | <i>dxr</i>   | <u>ACCGACAGTCCAGCCCCCTCGCC</u>                                                                                                                                     | putative 1-deoxy-D-xylulose<br>5-phosphate reductoisomerase            |
| 430 | <i>sav_3210</i> | <i>ispH</i>  | <u>GCCGAACCGCCGGC</u><br><u>GCCGCGTTGTACAGGC</u><br><u>ACCGACCCGGC</u><br><u>GCCGAAGATCGCC</u><br><u>GCCGCACCCGGC</u>                                              | putative<br>4-hydroxy-3-methylbut-2-enyl<br>diphosphate reductase      |
| 431 | <i>sav_3706</i> | <i>aco</i>   | <u>ACCGCCGAAGACAGGC</u>                                                                                                                                            | putative acyl-CoA oxidase                                              |
| 432 | <i>sav_3905</i> | <i>mqnB</i>  | <u>ACCGCGTCCCGGC</u>                                                                                                                                               | putative futasoline hydrolase<br>(menaquinone biosynthetic<br>protein) |
| 433 | <i>sav_6616</i> |              | <u>GCCGCCCCGC</u><br><u>GCCGCCGACTGACAGGC</u>                                                                                                                      | putative polyketide cyclase                                            |
| 434 | <i>sav_7363</i> |              | <u>GCCGCGCGGTACCCGGC</u><br><u>GCCGATTCCCGCGCGTCGGC</u><br><u>GCCGAGCCCCGTGGTCCCCACCGCC</u>                                                                        | putative carboxylesterase                                              |

GCCGCTGAGGTCCGGC  
GCCGAGTACTGGC  
GCCGACGCGCGGGAATCGGC

**Metabolism of amino acids and related molecules (100)**

|     |                 |              |                                                                                                                               |                                                          |
|-----|-----------------|--------------|-------------------------------------------------------------------------------------------------------------------------------|----------------------------------------------------------|
| 435 | <i>sav_4967</i> | <i>alr</i>   | <u>GCCGCTCGCC</u>                                                                                                             | putative alanine racemase                                |
| 436 | <i>sav_7269</i> | <i>amdA1</i> | <u>GCCGCCTGTCCCCAGCGCCTGCC</u><br><u>GCCGCTCTCGACGTGGCGCCGCC</u><br><u>ACCGCACCTCAGGC</u><br><u>ACCGCTCGCGGGCCGGACGGCAGGC</u> | putative amidase                                         |
| 437 | <i>sav_7345</i> | <i>amdA2</i> | <u>ACCGAACGGTAACCGCCCCGGC</u>                                                                                                 | putative amidase                                         |
| 438 | <i>sav_1790</i> | <i>arcB1</i> | <u>GCCGCGCGGCCGGCCGGC</u><br><u>GCCGCCGCGCGCCGGC</u>                                                                          | putative ornithine<br>cyclodeaminase                     |
| 439 | <i>sav_6763</i> | <i>argC</i>  | <u>ACCGACGCTGCCCGCC</u><br><u>ACCGCAGGCTGCC</u><br><u>ACCGAGTGCCGGC</u>                                                       | putative<br>N-acetyl-gamma-glutamyl-phosphate reductase  |
| 440 | <i>sav_2319</i> | <i>argF</i>  | <u>GCCGCCCCGGCCGGC</u>                                                                                                        | putative ornithine<br>carbamoyltransferase               |
| 441 | <i>sav_801</i>  | <i>argG1</i> | <u>GCCGCTGGAACACCGGC</u><br><u>ACCGCCCGCACCGACCTGCGCAGCC</u><br><u>GCCGATGCCGACCCCGCC</u><br><u>GCCGCAGGGTCGAAGAAGCTCGCC</u>  | putative argininosuccinate<br>synthase                   |
| 442 | <i>sav_6778</i> | <i>argG2</i> | <u>GCCGAACGCAGGC</u>                                                                                                          | putative argininosuccinate<br>synthase                   |
| 443 | <i>sav_3042</i> | <i>aroA</i>  | <u>GCCGCTTTCCGCC</u>                                                                                                          | putative 3-phosphoshikimate<br>1-carboxyvinyltransferase |
| 444 | <i>sav_6854</i> | <i>aroC</i>  | <u>GCCGCCGACGCCCGCGCAGGC</u><br><u>GCCGCAGCGGCCCGGTCTTCTGCC</u><br><u>GCCGCCGCGCCCCATCGCC</u>                                 | putative chorismate synthase                             |
| 445 | <i>sav_1777</i> | <i>aroE2</i> | <u>GCCGCCGACGGGTCGCC</u>                                                                                                      | putative shikimate<br>5-dehydrogenase                    |
| 446 | <i>sav_6210</i> | <i>aroH2</i> | <u>GCCGCACCCCGGGATGTCCCGCC</u>                                                                                                | putative chorismate mutase                               |
| 447 | <i>sav_5397</i> | <i>asd2</i>  | <u>GCCGCAGGCGCCGAAACGTTCGGC</u><br><u>GCCGCCCGGCCGGC</u><br><u>GCCGAACGTTTCCGGC</u>                                           | putative<br>aspartate-semialdehyde<br>dehydrogenase      |
| 448 | <i>sav_3128</i> | <i>aspB2</i> | <u>GCCGCACGGGACCGAGGCGTTTGGC</u>                                                                                              | putative aspartate<br>aminotransferase                   |
| 449 | <i>sav_4907</i> | <i>aspC1</i> | <u>ACCGCATCCGCC</u>                                                                                                           | putative aspartate<br>aminotransferase                   |
| 450 | <i>sav_6399</i> | <i>aspC2</i> | <u>GCCGCGGCGCGGGATCGGC</u><br><u>GCCGATCCCCCGGCC</u>                                                                          | putative aspartate<br>aminotransferase                   |
| 451 | <i>sav_5253</i> | <i>bglC2</i> | <u>ACCGCCGCCCGGC</u><br><u>GCCGCGGAGGTCTCGGC</u>                                                                              | putative beta-glucosidase                                |
| 452 | <i>sav_6404</i> | <i>cobC</i>  | <u>ACCGATCTCGCC</u>                                                                                                           | putative aminotransferase                                |
| 453 | <i>sav_1435</i> | <i>cysK1</i> | <u>ACCGCGGACGCGGCGTCGGC</u>                                                                                                   | cysteine synthase/cystathionine                          |



|     |                 |              |                                                                                                                                                         |                                                                                |
|-----|-----------------|--------------|---------------------------------------------------------------------------------------------------------------------------------------------------------|--------------------------------------------------------------------------------|
| 454 | <i>sav_3510</i> | <i>cysM1</i> | <u>GCCGCGCCACCTCCTTGTAGCC</u><br><u>GCCGACCGCC</u>                                                                                                      | beta-synthase family<br>putative cystathionine<br>beta-synthase                |
| 455 | <i>sav_2516</i> | <i>dapA2</i> | <u>GCCGCAATACGGACACTTCGCC</u>                                                                                                                           | putative dihydrodipicolinate<br>synthase                                       |
| 456 | <i>sav_5580</i> | <i>dapA3</i> | <u>ACCGACCGTCAATGGCGCCTCGCC</u>                                                                                                                         | putative dihydrodipicolinate<br>synthase                                       |
| 457 | <i>sav_4517</i> | <i>dapC</i>  | <u>GCCGCTCCTCCGGC</u><br><u>GCCGCGCTGTGCGCCCGCC</u><br><u>ACCGCAGCCCGGCCTTCTGTGTCGCC</u>                                                                | putative<br>N-succinyldiaminopimelate<br>aminotransferase                      |
| 458 | <i>sav_6339</i> | <i>dapD</i>  | <u>GCCGCCC GTGCTCGGC</u>                                                                                                                                | putative<br>2,3,4,5-tetrahydropyridine-2-ca<br>rboxylate N-succinyltransferase |
| 459 | <i>sav_3125</i> | <i>dapE</i>  | <u>GCCGAGCGGGAGTGGGGGTCGGC</u>                                                                                                                          | putative<br>succinyl-diaminopimelate<br>desuccinylase                          |
| 460 | <i>sav_2473</i> | <i>dapF1</i> | <u>GCCGCGTGATCGGATCCGCC</u><br><u>ACCGACGGCCCGGC</u><br><u>GCCGCCTGCC</u><br><u>GCCGATCCGCCTGCC</u><br><u>ACCGACACCCACGGCCCGCC</u><br><u>ACCGCTCGCC</u> | putative diaminopimelate<br>epimerase                                          |
| 461 | <i>sav_1690</i> | <i>ddh</i>   | <u>GCCG CAGGCCCCCGTCGCAGGC</u>                                                                                                                          | putative dimethylarginine<br>dimethylaminohydrolase                            |
| 462 | <i>sav_7126</i> | <i>def2</i>  | <u>GCCGCGCCCTGTCCCGGC</u>                                                                                                                               | putative<br>polypeptide deformylase                                            |
| 463 | <i>sav_7349</i> | <i>def3</i>  | <u>GCCGCTCGATCTGCCTGGC</u>                                                                                                                              | putative<br>polypeptide deformylase                                            |
| 464 | <i>sav_6397</i> | <i>ectB</i>  | <u>ACCGAGGAGCGATTTCGCC</u>                                                                                                                              | L-2,4-diaminobutyrate<br>aminotransferase                                      |
| 465 | <i>sav_6395</i> | <i>ectD</i>  | <u>GCCGCGGCGCCCGCC</u>                                                                                                                                  | ectoine hydroxylase (Fe<br>(II)/alpha-ketogutarate<br>dependent hydroxylase)   |
| 466 | <i>sav_7341</i> | <i>egtA</i>  | <u>ACCGAAGCCGGGTCCGGC</u>                                                                                                                               | putative glutamate-cysteine<br>ligase                                          |
| 467 | <i>sav_7134</i> | <i>gabD2</i> | <u>GCCGACCACCGCCGACCACCGGC</u><br><u>GCCGACCACCGGC</u>                                                                                                  | putative<br>succinate-semialdehyde<br>dehydrogenase,<br>NADP-dependent         |
| 468 | <i>sav_7159</i> | <i>gabD3</i> | <u>GCCGCCACCTACCGCC</u><br><u>ACCGACCGTCTCACCGGC</u><br><u>GCCGAAGCCGTCCGCC</u>                                                                         | putative<br>succinate-semialdehyde<br>dehydrogenase,<br>NADP-dependent         |
| 469 | <i>sav_2773</i> | <i>gcvT</i>  | <u>GCCGCATCTGTAACCGGC</u>                                                                                                                               | putative glycine cleavage                                                      |

|     |                 |              |                                                                                                                                                             |                                                                     |
|-----|-----------------|--------------|-------------------------------------------------------------------------------------------------------------------------------------------------------------|---------------------------------------------------------------------|
|     |                 |              |                                                                                                                                                             | system protein T<br>(aminomethyltransferase)                        |
| 470 | <i>sav_5075</i> | <i>gdhA1</i> | <u>GCCGATGGCGTTGCC</u>                                                                                                                                      | putative NAD-specific<br>glutamate dehydrogenase                    |
| 471 | <i>sav_4963</i> | <i>glmS1</i> | <u>GCCGCTCCACGCTCACTCCCGGC</u><br><u>GCCGAGCCGTACCCCGGC</u><br><u>GCCGAGAGCCGCC</u>                                                                         | putative<br>L-glutamine-D-fructose-6-phos<br>phate amidotransferase |
| 472 | <i>sav_5954</i> | <i>glnA1</i> | <u>GCCGACCTCGGC</u>                                                                                                                                         | putative glutamine synthetase                                       |
| 473 | <i>sav_5997</i> | <i>glnA2</i> | <u>ACCGCGGCCGGC</u><br><u>ACCGCGGCGTTCGGC</u>                                                                                                               | putative glutamine synthetase                                       |
| 474 | <i>sav_6005</i> | <i>glnA3</i> | <u>ACCGCACTGGC</u><br><u>GCCGAAGTTAACCGGC</u>                                                                                                               | putative glutamine synthetase                                       |
| 475 | <i>sav_6725</i> | <i>glnA4</i> | <u>GCCGAGAGCCATAAGGTATTGCC</u>                                                                                                                              | putative glutamine synthetase                                       |
| 476 | <i>sav_1314</i> | <i>glsA</i>  | <u>GCCGAGGGCCTGTTCCGCC</u><br><u>GCCGACCGGC</u>                                                                                                             | putative glutaminase                                                |
| 477 | <i>sav_6189</i> | <i>gltB</i>  | <u>GCCGCACTCAGCC</u><br><u>GCCGCAGCCGGCGATGCCCTCGCC</u><br><u>GCCGATGCGTACGCCGCGCCAGCC</u><br><u>GCCGCGGCTGAGTGCGGCGCAGGC</u><br><u>GCCGAGGGACGACGTTGGC</u> | putative glutamate synthase<br>(NADPH) large subunit                |
| 478 | <i>sav_6258</i> | <i>gltD2</i> | <u>ACCGCGCCACGAGGCTCTCGGC</u><br><u>GCCGCCTGGC</u><br><u>ACCGACCGGGAACCGTGCCAGGC</u><br><u>GCCGCCCGGCCCGCCGCTCGGC</u>                                       | putative glutamate synthase<br>small subunit                        |
| 479 | <i>sav_3419</i> | <i>glyA3</i> | <u>GCCGCGTCGCCGCCCGTCCGGC</u><br><u>GCCGACGGGCCGTGACTGGC</u>                                                                                                | putative serine<br>hydroxymethyltransferase                         |
| 480 | <i>sav_6955</i> | <i>hcaC2</i> | <u>ACCGCACGTCCCTGACTGGC</u>                                                                                                                                 | putative ferredoxin subunit of<br>phenylpropionate dioxygenase      |
| 481 | <i>sav_4261</i> | <i>hisC2</i> | <u>ACCGCATGAGCCCTACTATCGGC</u><br><u>GCCGAGCAGGC</u><br><u>ACCGCCACCGGC</u><br><u>ACCGACTGGC</u>                                                            | putative histidinol-phosphate<br>aminotransferase                   |
| 482 | <i>sav_6153</i> | <i>hisD</i>  | <u>GCCGAGCAACCGAGCAGCC</u>                                                                                                                                  | putative histidinol<br>dehydrogenase                                |
| 483 | <i>sav_6906</i> | <i>hisE</i>  | <u>GCCGAGCCGGC</u>                                                                                                                                          | putative phosphoribosyl-ATP<br>pyrophosphatase                      |
| 484 | <i>sav_6170</i> | <i>hisI</i>  | <u>ACCGCCCCGCGGTCGGC</u><br><u>GCCGCGCGGTCCGCC</u><br><u>GCCGACCGGCCGGGCGGTCTAGGC</u><br><u>GCCGCGCCGGTCCGACATCCCGGC</u>                                    | putative phosphoribosyl-AMP<br>cyclohydrolase                       |
| 485 | <i>sav_3325</i> | <i>hutH1</i> | <u>GCCGCCCGGTCCCGCC</u>                                                                                                                                     | putative histidine<br>ammonia-lyase                                 |
| 486 | <i>sav_3504</i> | <i>hutH2</i> | <u>ACCGCCAGGC</u>                                                                                                                                           | putative histidine<br>ammonia-lyase                                 |

|     |                 |              |                                                                                                                                                                     |                                                                               |
|-----|-----------------|--------------|---------------------------------------------------------------------------------------------------------------------------------------------------------------------|-------------------------------------------------------------------------------|
| 487 | <i>sav_2733</i> | <i>ilvB1</i> | <u>ACCGCACCCGGC</u>                                                                                                                                                 | acetolactate synthase large subunit                                           |
| 488 | <i>sav_2731</i> | <i>ilvC</i>  | <u>GCCGACGACTGACGACCGCC</u>                                                                                                                                         | ketol-acid reductoisomerase                                                   |
| 489 | <i>sav_4716</i> | <i>ilvD1</i> | <u>ACCGCCACCGACCGGC</u><br><u>ACCGCCACCGACGGTCCGCC</u><br><u>ACCGCCCCGACCGGC</u>                                                                                    | putative dihydroxy-acid dehydratase                                           |
| 490 | <i>sav_2717</i> | <i>ilvE</i>  | <u>GCCGCGCCACTGCC</u><br><u>GCCGCACGCACACCGTTCACAGCC</u><br><u>GCCGCGCTCACGCCCGTACCGCC</u>                                                                          | putative branched-chain amino acid aminotransferase                           |
| 491 | <i>sav_5601</i> | <i>leuA2</i> | <u>ACCGCCAGCAGCC</u>                                                                                                                                                | putative 2-isopropylmalate synthase                                           |
| 492 | <i>sav_2686</i> | <i>leuC</i>  | <u>GCCGACACAGGCCGGC</u><br><u>ACCGCGCGTCCGCCGCC</u>                                                                                                                 | putative 3-isopropylmalate dehydratase large subunit                          |
| 493 | <i>sav_4559</i> | <i>lysC</i>  | <u>GCCGCTCCAGGACGGCATCTGCC</u><br><u>GCCGAAATTCCCTGCC</u><br><u>ACCGCACAACTGCGGTCCGGC</u>                                                                           | putative aspartate kinase                                                     |
| 494 | <i>sav_3382</i> | <i>mcmA2</i> | <u>ACCGCCCCCTACTCCGCC</u><br><u>ACCGCACATCTGCC</u><br><u>GCCGACTCGTTGGTTACTCGCC</u>                                                                                 | putative methylmalonyl-CoA mutase, alpha subunit                              |
| 495 | <i>sav_3305</i> | <i>metB</i>  | <u>GCCGCGCGCGGCACGTACAGCC</u><br><u>ACCGCCCCGC</u><br><u>GCCGCACCCGTAGGC</u><br><u>ACCGCCGACCGGGTTGGC</u><br><u>GCCGCAGGCCGGGCGGTTTTGCC</u>                         | putative cystathionine gamma-synthase                                         |
| 496 | <i>sav_2046</i> | <i>metE</i>  | <u>ACCGCGCCTTGCCGCGGGTCCGGC</u><br><u>GCCGACCCGCC</u>                                                                                                               | putative 5-methyltetrahydropteroyltriglutamate-homocysteine methyltransferase |
| 497 | <i>sav_6667</i> | <i>metH</i>  | <u>ACCGCCCCGTTCGGC</u><br><u>GCCGAGCCATTGGC</u>                                                                                                                     | putative 5-methyltetrahydrofolate: homocysteine S-methyltransferase           |
| 498 | <i>sav_7062</i> | <i>mgl</i>   | <u>GCCGCTGTTCAGGCTTCCCGGC</u>                                                                                                                                       | putative methionine gamma lyase                                               |
| 499 | <i>sav_2111</i> | <i>mmuM</i>  | <u>GCCGCGGCCGAGAGGAGGGATCGCC</u><br><u>GCCGCGGCCAGCCGTAAGGC</u>                                                                                                     | putative homocysteine S-methyltransferase                                     |
| 500 | <i>sav_3307</i> | <i>msrA</i>  | <u>GCCGCAGCACCACGTCGGC</u><br><u>GCCGCGTAGCC</u><br><u>ACCGCCCCGCCTCAGGGTGTAGGC</u><br><u>ACCGACCGCC</u><br><u>GCCGCTGCTGCC</u><br><u>ACCGCGAGGAGCGCACCGACCTGCC</u> | putative peptide methionine sulfoxide reductase                               |
| 501 | <i>sav_2330</i> | <i>narB</i>  | <u>GCCGACGACGGTACGAATTGCC</u>                                                                                                                                       | putative assimilatory nitrate reductase large subunit                         |

|     |                 |              |                                                                                                                                                                                                                                     |                                                |
|-----|-----------------|--------------|-------------------------------------------------------------------------------------------------------------------------------------------------------------------------------------------------------------------------------------|------------------------------------------------|
| 502 | <i>sav_2127</i> | <i>nirA</i>  | <u>GCCGAGGTCGACGTGCCGCC</u>                                                                                                                                                                                                         | putative ferredoxin-nitrite reductase          |
| 503 | <i>sav_1257</i> | <i>paaK</i>  | <u>GCCGACCTCTTGCC</u><br><u>ACCGAATGATCGGTTCGCC</u><br><u>ACCGATCATTCGGTAGCC</u>                                                                                                                                                    | putative phenylacetate: CoA ligase             |
| 504 | <i>sav_5473</i> | <i>proA</i>  | <u>ACCGCGAGACAGGC</u>                                                                                                                                                                                                               | putative gamma-glutamyl phosphate reductase    |
| 505 | <i>sav_2823</i> | <i>pta</i>   | <u>GCCGCGAAAATCACCCGCC</u>                                                                                                                                                                                                          | putative phosphotransacetylase                 |
| 506 | <i>sav_3420</i> | <i>rocD1</i> | <u>GCCGACGGGCCGTGACTGGC</u><br><u>GCCGCGTCGCCGCCGTCCGGC</u>                                                                                                                                                                         | putative ornithine aminotransferase            |
| 507 | <i>sav_2285</i> | <i>rocD3</i> | <u>ACCGCGGGCCGTGAGCGGCCGCC</u>                                                                                                                                                                                                      | putative ornithine aminotransferase            |
| 508 | <i>sav_1636</i> | <i>rocG</i>  | <u>GCCGACCGCC</u>                                                                                                                                                                                                                   | putative NADP-specific glutamate dehydrogenase |
| 509 | <i>sav_5053</i> | <i>sahH</i>  | <u>GCCGCATCCGCC</u><br><u>GCCGCCCGGC</u><br><u>GCCGCGCCGCC</u><br><u>GCCGCCGCGCAGACCAGCC</u><br><u>GCCGCGCGGACGCCGGGGCGGCTGCC</u><br><u>ACCGCCATCAGCAGCGACGTCTGGC</u>                                                               | putative S-adenosyl-L-homocysteine hydrolase   |
| 510 | <i>sav_4736</i> | <i>serB1</i> | <u>GCCGCAGAGAGTTCACAGCC</u><br><u>ACCGAACAAACTGGC</u>                                                                                                                                                                               | putative 3-phosphoserine phosphatase           |
| 511 | <i>sav_6470</i> | <i>serB2</i> | <u>GCCGATCCGGC</u><br><u>GCCGCCGCTGGGGGCCGACCCGGC</u><br><u>GCCGAGGGCCGACCCGGCTGGC</u><br><u>GCCGCGCCCCCGGACCCGGATCGGC</u><br><u>GCCGCGCCCCGCGAGCCGGATCGGC</u><br><u>GCCGCGCCCCGCGGACCCGGGCCGGC</u><br><u>GCCGCGCCAGCCGGGTCTGGC</u> | putative 3-phosphoserine phosphatase           |
| 512 | <i>sav_3883</i> | <i>serC</i>  | <u>ACCGAGCAGGTCCGGC</u><br><u>GCCGCCCGCCGCCCGGC</u>                                                                                                                                                                                 | putative phosphoserine aminotransferase        |
| 513 | <i>sav_1628</i> | <i>tdh</i>   | <u>GCCGAGGCGGGCCGGACAGCC</u>                                                                                                                                                                                                        | putative threonine 3-dehydrogenase             |
| 514 | <i>sav_4526</i> | <i>tdo</i>   | <u>GCCGCTCAGCC</u>                                                                                                                                                                                                                  | putative tryptophan 2,3-dioxygenase            |
| 515 | <i>sav_2918</i> | <i>thrA</i>  | <u>GCCGCCGTACAGCTGCTGCC</u><br><u>ACCGAACGGGACTTTCGGC</u>                                                                                                                                                                           | putative homoserine dehydrogenase              |
| 516 | <i>sav_2916</i> | <i>thrB</i>  | <u>GCCGCCTGAACCGCTCGAACCGCC</u><br><u>ACCGCCACCCCTACCGCC</u>                                                                                                                                                                        | putative homoserine kinase                     |
| 517 | <i>sav_6177</i> | <i>trpB</i>  | <u>GCCGCTGCCGTGCCGGC</u><br><u>GCCGCCCGGC</u><br><u>GCCGAACCGGC</u><br><u>GCCGCTCTGCC</u><br><u>GCCGCCGCTCCCGCCGTCGGC</u>                                                                                                           | putative tryptophan synthase beta subunit      |

|                                      |                 |              |                                                                                                                                            |                                                                                  |
|--------------------------------------|-----------------|--------------|--------------------------------------------------------------------------------------------------------------------------------------------|----------------------------------------------------------------------------------|
| 518                                  | <i>sav_7104</i> | <i>ureA</i>  | <u>GCCGCGGTGGCTGCGGCAGCC</u>                                                                                                               | putative urease gamma subunit                                                    |
| 519                                  | <i>sav_2716</i> | <i>ureAB</i> | <u>ACCGACAGGGCCTCGCC</u><br><u>GCCGACCTCGCC</u>                                                                                            | putative urease beta/gamma subunit                                               |
| 520                                  | <i>sav_954</i>  | <i>yerD1</i> | <u>GCCGAAGTCACCCGGACCCGGC</u><br><u>GCCGCAGGCCACAGCGGCAGCC</u><br><u>ACCGCACTGGC</u><br><u>GCCGAAGGCCGGC</u><br><u>GCCGCCCTCCATGTCCGCC</u> | putative glutamate synthase (ferredoxin)                                         |
| 521                                  | <i>sav_1232</i> | <i>yerD2</i> | <u>GCCGCCCTCAGCCGGC</u>                                                                                                                    | putative glutamate synthase (ferredoxin)                                         |
| 522                                  | <i>sav_1061</i> |              | <u>GCCGCGGCGCGTGGGAGAGGCCGGC</u>                                                                                                           | putative aminotransferase                                                        |
| 523                                  | <i>sav_1112</i> |              | <u>ACCGCACGCCGGGCGCCCGGC</u>                                                                                                               | putative taurine catabolism dioxygenase                                          |
| 524                                  | <i>sav_1520</i> |              | <u>ACCGCACACGGCCGACCGCC</u><br><u>GCCGCTGGATGGGGCGACAGCC</u><br><u>GCCGCTCGGC</u>                                                          | putative 1-aminocyclopropane-1-carboxylate deaminase                             |
| 525                                  | <i>sav_2578</i> |              | <u>ACCGCAGCCGACGGCTCTCCGCC</u><br><u>ACCGCTTCCGCTCAGCC</u>                                                                                 | putative sugar hydrolase                                                         |
| 526                                  | <i>sav_2592</i> |              | <u>GCCGACCCCGCC</u>                                                                                                                        | putative aldehyde dehydrogenase                                                  |
| 527                                  | <i>sav_2692</i> |              | <u>GCCGCCCCACCGCGTTAGCC</u>                                                                                                                | putative 2-keto-4-pentenoate hydratase/2-oxohepta-3-ene-1,7-dioic acid hydratase |
| 528                                  | <i>sav_3009</i> |              | <u>GCCGCCCGGCCGCC</u>                                                                                                                      | putative 1-aminocyclopropane-1-carboxylate deaminase                             |
| 529                                  | <i>sav_3281</i> |              | <u>GCCGCGCGACAGCGAGGCCCGGC</u>                                                                                                             | putative D-amino acid deaminase                                                  |
| 530                                  | <i>sav_4551</i> |              | <u>GCCGCGGACATCTACCCTCGGC</u>                                                                                                              | putative aminotransferase                                                        |
| 531                                  | <i>sav_6046</i> |              | <u>ACCGACCAGCGAGGCCGCAGCC</u><br><u>ACCGCGCGCTCGGC</u>                                                                                     | putative aminotransferase                                                        |
| 532                                  | <i>sav_6057</i> |              | <u>GCCGACTGTCCGGC</u><br><u>GCCGAGCCCGCC</u><br><u>ACCGCGCCCGCGTCACCTCGCC</u>                                                              | putative aminotransferase                                                        |
| 533                                  | <i>sav_6946</i> |              | <u>ACCGCCCGCAGACCGGC</u>                                                                                                                   | putative choline oxidase                                                         |
| 534                                  | <i>sav_7160</i> |              | <u>ACCGCTGGTACGCGCGGTCGGC</u>                                                                                                              | putative aminotransferase                                                        |
| <b>Carbohydrate metabolism (114)</b> |                 |              |                                                                                                                                            |                                                                                  |
| 535                                  | <i>sav_1115</i> | <i>abfB</i>  | <u>GCCGACAGGC</u><br><u>GCCGACCTGGCATTACAGGC</u>                                                                                           | putative alpha L-arabinofuranosidase                                             |
| 536                                  | <i>sav_2043</i> | <i>aceA</i>  | <u>GCCGCACCCAGAGACAGGC</u><br><u>GCCGCACCGAACTCTGACTGGC</u>                                                                                | putative isocitrate lyase                                                        |
| 537                                  | <i>sav_2000</i> | <i>aceB1</i> | <u>ACCGCTCCCGAGGCGCCCGCCAGCC</u>                                                                                                           | putative malate synthase                                                         |
| 538                                  | <i>sav_2044</i> | <i>aceB2</i> | <u>GCCGCGTCCACCGGC</u><br><u>GCCGCCCGCATCGCCGGCCCGCC</u>                                                                                   | putative malate synthase                                                         |

|     |                 |               |                                                                                                                                                   |                                                  |
|-----|-----------------|---------------|---------------------------------------------------------------------------------------------------------------------------------------------------|--------------------------------------------------|
| 539 | <i>sav_5800</i> | <i>aceE1</i>  | <u>GCCGAAACGGTGACGATCCTGGC</u><br><u>GCCGACACCGCC</u>                                                                                             | putative pyruvate<br>dehydrogenase E1 component  |
| 540 | <i>sav_6020</i> | <i>aceE2</i>  | <u>GCCGCCCCGCGGCC</u><br><u>GCCGCCCTGTCTGGC</u>                                                                                                   | putative pyruvate<br>dehydrogenase E1 component  |
| 541 | <i>sav_2258</i> | <i>acnA</i>   | <u>ACCGCGGTCCGGGCATGACCAGCC</u><br><u>GCCGAAGGCGCCCCGCAGCCGCC</u><br><u>ACCGCGGTGACCTGGC</u><br><u>ACCGCAATCCTGCCGCC</u>                          | putative aconitase                               |
| 542 | <i>sav_4599</i> | <i>acsA1</i>  | <u>GCCGCCCGGACCGCACTCGGCCGCC</u><br><u>ACCGCACCCAGCGTCCCGGC</u><br><u>GCCGCGCCTGGC</u>                                                            | putative acetyl-CoA synthetase                   |
| 543 | <i>sav_6970</i> | <i>acsA2</i>  | <u>GCCGCGTGCCGCGCACACCCAGCC</u>                                                                                                                   | putative acetyl-CoA synthetase                   |
| 544 | <i>sav_1141</i> | <i>adhA1</i>  | <u>GCCGATGCCTGGC</u>                                                                                                                              | putative alcohol dehydrogenase                   |
| 545 | <i>sav_1357</i> | <i>adhA2</i>  | <u>GCCGACCCGTCGCC</u>                                                                                                                             | putative alcohol dehydrogenase                   |
| 546 | <i>sav_1393</i> | <i>adhA3</i>  | <u>GCCGATTACACAGGCCGCC</u>                                                                                                                        | putative alcohol dehydrogenase                   |
| 547 | <i>sav_3314</i> | <i>adhA4</i>  | <u>ACCGCTGGACGTAGGC</u><br><u>GCCGAAGGCAGCCGGC</u>                                                                                                | putative NADP-dependent<br>alcohol dehydrogenase |
| 548 | <i>sav_3707</i> | <i>adhA5</i>  | <u>ACCGCTGCCTGGC</u><br><u>GCCGCCCGAGGTCGGCGTCGTCGGC</u><br><u>GCCGCGTGGCAGGCAGCGGTAGCC</u><br><u>GCCGCCAGCC</u>                                  | putative alcohol dehydrogenase                   |
| 549 | <i>sav_6953</i> | <i>adhA10</i> | <u>ACCGAGCCATACAGGCCTGGC</u><br><u>GCCGCTGTGTGTCGGC</u><br><u>GCCGAAATCTCGCC</u>                                                                  | putative alcohol dehydrogenase                   |
| 550 | <i>sav_2186</i> | <i>agaA2</i>  | <u>GCCGAGGGTCTGGC</u><br><u>ACCGCGCCGACATCACGCCGCC</u><br><u>GCCGCCGCTCACTGACTGCC</u>                                                             | putative alpha-galactosidase,<br>secreted        |
| 551 | <i>sav_1077</i> | <i>agaA3</i>  | <u>GCCGCCGTCCGACCGCC</u><br><u>GCCGCCCCGCACCAACCGCC</u>                                                                                           | putative alpha-galactosidase,<br>secreted        |
| 552 | <i>sav_1641</i> | <i>agaB2</i>  | <u>GCCGCGCAAGAGATTCCGCC</u>                                                                                                                       | putative alpha-galactosidase,<br>secreted        |
| 553 | <i>sav_1187</i> | <i>aldH</i>   | <u>GCCGCATGGC</u>                                                                                                                                 | putative aldehyde<br>dehydrogenase               |
| 554 | <i>sav_2152</i> | <i>amyA1</i>  | <u>GCCGATCCGTCTTGACCGGC</u><br><u>GCCGCCGGGGGCGTCCGGC</u><br><u>GCCGACGGTACGTCTCGCC</u><br><u>GCCGAAGCCGCCCGGC</u><br><u>GCCGCCAGGGCCCGTCCGCC</u> | putative alpha-amylase                           |
| 555 | <i>sav_5756</i> | <i>bga7</i>   | <u>ACCGCCGCGCTCGGTCTGGC</u><br><u>ACCGAGCGCGGCGGTGCCGGC</u>                                                                                       | putative beta-galactosidase                      |
| 556 | <i>sav_7479</i> | <i>bga8</i>   | <u>GCCGCGGGCCGGC</u><br><u>GCCGCGGTGGCGATCCGGC</u>                                                                                                | putative beta-galactosidase,<br>secreted         |
| 557 | <i>sav_4362</i> | <i>bkdA</i>   | <u>GCCGCCCGCCCGCC</u><br><u>ACCGATTGTTCGGTCGTCGGC</u>                                                                                             | putative<br>3-methyl-2-oxobutanoate              |

|     |                 |              |                                  |                                                                      |
|-----|-----------------|--------------|----------------------------------|----------------------------------------------------------------------|
|     |                 |              |                                  | dehydrogenase (lipoamide)                                            |
|     |                 |              |                                  | E1-alpha chain                                                       |
| 558 | <i>sav_4363</i> | <i>bkdB</i>  | <u>GCCGATGACCTCCGTTGGC</u>       | putative<br>3-methyl-2-oxobutanoate<br>dehydrogenase (lipoamide)     |
|     |                 |              |                                  | E1-beta chain                                                        |
| 559 | <i>sav_1856</i> | <i>celA3</i> | <u>GCCGCCCCGGC</u>               | putative secreted endo-1,                                            |
|     |                 |              | <u>ACCGCCCCGGC</u>               | 4-beta-glucanase                                                     |
| 560 | <i>sav_2568</i> | <i>celA4</i> | <u>GCCGCCGGATCTTCCGGAGGTTGCC</u> | putative secreted endo-1,                                            |
|     |                 |              |                                  | 4-beta-glucanase                                                     |
| 561 | <i>sav_6896</i> | <i>celA5</i> | <u>GCCGCCCCGAGGGCCGAGCGCAGGC</u> | putative endo-1,                                                     |
|     |                 |              |                                  | 4-beta-glucanase, secreted                                           |
| 562 | <i>sav_5568</i> | <i>celS1</i> | <u>GCCGCCCCGCTCCCGGC</u>         | putative cellulose-binding                                           |
|     |                 |              | <u>GCCGCGGACCGGCGGCGCCGCC</u>    | protein                                                              |
|     |                 |              | <u>ACCGCCCTGCC</u>               |                                                                      |
|     |                 |              | <u>GCCGACCGCCGCC</u>             |                                                                      |
|     |                 |              | <u>GCCGCCACCTCGCCACCGCCGGC</u>   |                                                                      |
|     |                 |              | <u>GCCGAGCGGGGCCGGGGGCCCGCC</u>  |                                                                      |
| 563 | <i>sav_2254</i> | <i>celS2</i> | <u>GCCGCACCCGCC</u>              | putative cellulose-binding                                           |
|     |                 |              | <u>GCCGCCGCTCCTGGGGCCGGC</u>     | protein                                                              |
| 564 | <i>sav_2585</i> | <i>chiA1</i> | <u>ACCGCCTCAGATCGCC</u>          | putative secreted chitinase A                                        |
| 565 | <i>sav_1751</i> | <i>chiD</i>  | <u>GCCGATGCTGCCGCC</u>           | putative secreted chitinase I                                        |
|     |                 |              | <u>GCCGCTGGTCAGCAGCC</u>         |                                                                      |
| 566 | <i>sav_5330</i> | <i>citA1</i> | <u>GCCGCCAATAGGC</u>             | putative citrate synthase                                            |
|     |                 |              | <u>GCCGCCAACCTGCTCATCCTGCC</u>   |                                                                      |
| 567 | <i>sav_5219</i> | <i>csIA</i>  | <u>ACCGACCTGCC</u>               | putative glycosyltransferase<br>(cellulose synthase-like<br>protein) |
| 568 | <i>sav_5217</i> | <i>csIZ</i>  | <u>ACCGACAAGGGTTGATTGTCGCC</u>   | putative endo-1,<br>4-beta-glucanase, secreted                       |
| 569 | <i>sav_2015</i> | <i>csn1</i>  | <u>GCCGCCCCCGCCGCC</u>           | putative chitosanase, secreted                                       |
| 570 | <i>sav_1307</i> | <i>dexA</i>  | <u>GCCGCGAAGATGCTCGCC</u>        | putative oligo-1, 6-glucosidase                                      |
| 571 | <i>sav_3533</i> | <i>eno</i>   | <u>GCCGATCCCTCAGAGCCGGTTAGGC</u> | putative enolase                                                     |
| 572 | <i>sav_3942</i> | <i>fruK</i>  | <u>GCCGACCGCCGTCTCTTTGGC</u>     | putative tagatose-6-phosphate                                        |
|     |                 |              | <u>ACCGCTGCCGACAGGC</u>          | kinase                                                               |
|     |                 |              | <u>GCCGACCGCC</u>                |                                                                      |
| 573 | <i>sav_6421</i> | <i>fucA2</i> | <u>GCCGCACACGTCGCC</u>           | putative fucose-1-phosphate                                          |
|     |                 |              | <u>ACCGATACATATCGCC</u>          | aldolase                                                             |
|     |                 |              | <u>GCCGCGATCCTGCCAGGC</u>        |                                                                      |
| 574 | <i>sav_4575</i> | <i>galE2</i> | <u>ACCGCGCTGCC</u>               | putative UDP-glucose                                                 |
|     |                 |              | <u>GCCGCACGCTAGGCCCGGC</u>       | 4-epimerase                                                          |
| 575 | <i>sav_1011</i> | <i>galE5</i> | <u>ACCGCACCGCGTCCGGC</u>         | putative UDP-glucose                                                 |
|     |                 |              |                                  | 4-epimerase                                                          |
| 576 | <i>sav_1662</i> | <i>galE6</i> | <u>ACCGCAGATCGCC</u>             | putative UDP-glucose                                                 |

|     |          |       |                                  |                                                                                |
|-----|----------|-------|----------------------------------|--------------------------------------------------------------------------------|
|     |          |       | <u>ACCGCCTCCGCC</u>              | 4-epimerase                                                                    |
|     |          |       | <u>GCCGACCGGC</u>                |                                                                                |
|     |          |       | <u>ACCGCCATCCTCACCGGTCAGCC</u>   |                                                                                |
|     |          |       | <u>GCCGACACGCCGCCCGCCGCC</u>     |                                                                                |
|     |          |       | <u>GCCGCGGTTTGTGGCCCGGC</u>      |                                                                                |
| 577 | sav_3018 | gamA  | <u>ACCGCACCCGGC</u>              | putative                                                                       |
|     |          |       | <u>GCCGATGTGGGACAGGC</u>         | glucosamine-6-phosphate<br>isomerase                                           |
| 578 | sav_6296 | gap2  | <u>ACCGAAACGAGTGGTCAGGC</u>      | glyceraldehyde-3-phosphate<br>dehydrogenase (sensitive to<br>pentalenolactone) |
|     |          |       | <u>ACCGCCTCGCC</u>               |                                                                                |
| 579 | sav_1922 | gdh   | <u>GCCGCGCCGTCCCGGGCAACCCGGC</u> | putative glucose<br>1-dehydrogenase                                            |
| 580 | sav_2024 | gip   | <u>GCCGCGTTTTCCACCGGC</u>        | putative hydroxypyruvate<br>isomerase                                          |
|     |          |       | <u>GCCGAAGCCCGGC</u>             |                                                                                |
| 581 | sav_2805 | glgB  | <u>GCCGACCCCTGCC</u>             | putative 1, 4-alpha glucan<br>branching enzyme                                 |
| 582 | sav_2800 | glgP  | <u>GCCGACACGCCACTGGGCAGCC</u>    | putative glycogen<br>phosphorylase                                             |
|     |          |       | <u>ACCGCCACAAGGTCGCGCAGGC</u>    |                                                                                |
|     |          |       | <u>GCCGCGGTGAATTTCTGCC</u>       |                                                                                |
|     |          |       | <u>ACCGCACGAGAGGCTGCC</u>        |                                                                                |
|     |          |       | <u>GCCGATTCCGCCCGCC</u>          |                                                                                |
|     |          |       | <u>GCCGCGGGCCATCGGGTGCCCGCC</u>  |                                                                                |
| 583 | sav_1918 | glxK  | <u>ACCGCAGGACGCACTCGCC</u>       | putative glycerate kinase                                                      |
| 584 | sav_4318 | gnd2  | <u>GCCGCGGGGCGCGACGGGGTCCGGC</u> | putative 6-phosphogluconate<br>dehydrogenase                                   |
| 585 | sav_7249 | gnd3  | <u>GCCGCTCCATCCCGCC</u>          | putative 6-phosphogluconate<br>dehydrogenase                                   |
|     |          |       | <u>GCCGATTGCCGCCCTGTCTGGC</u>    |                                                                                |
| 586 | sav_3979 | gpmA1 | <u>GCCGACAGGCGGACGCCCTGCC</u>    | putative 2,<br>3-bisphosphoglycerate-depende<br>nt phosphoglycerate mutase     |
| 587 | sav_7214 | icdA  | <u>GCCGACGGTCTCCCCGCCCGCCGCC</u> | isocitrate dehydrogenase                                                       |
|     |          |       | <u>GCCGACGGTCTCCCCCGCC</u>       |                                                                                |
|     |          |       | <u>GCCGCCGTCTCCGCC</u>           |                                                                                |
|     |          |       | <u>GCCGATCGACGCCCCCGCC</u>       |                                                                                |
|     |          |       | <u>GCCGACCTCGCCGGGCCCGGC</u>     |                                                                                |
|     |          |       | <u>GCCGCCCTGATCGGCTCGGC</u>      |                                                                                |
| 588 | sav_7150 | iolC2 | <u>ACCGCACAGGC</u>               | 5-dehydro-2-deoxygluconokina<br>se                                             |
|     |          |       | <u>GCCGCGTCATCGGC</u>            |                                                                                |
| 589 | sav_1234 | iolG1 | <u>ACCGCTGCTCCGCCGCCCGCC</u>     | putative myo-inositol<br>2-dehydrogenase                                       |
| 590 | sav_3280 | kdgK  | <u>GCCGCGCGACAGCGAGGAGCCCGGC</u> | putative<br>2-oxo-3-deoxygluconate kinase                                      |
| 591 | sav_4877 | korA  | <u>ACCGCTCCCGGACAGCCGCC</u>      | putative 2-oxoglutarate                                                        |



|     |                 |              |                                                                                                                                                                                                                                                                                                  |                                                                                    |
|-----|-----------------|--------------|--------------------------------------------------------------------------------------------------------------------------------------------------------------------------------------------------------------------------------------------------------------------------------------------------|------------------------------------------------------------------------------------|
|     |                 |              |                                                                                                                                                                                                                                                                                                  | ferredoxin oxidoreductase,<br>alpha subunit                                        |
| 592 | <i>sav_1764</i> | <i>lamA1</i> | <u>GCCGAGGTTCTGGTAGATGCTGGC</u><br><u>GCCGCTGGGCGCCTGGGGCCGCC</u>                                                                                                                                                                                                                                | putative endo-1,<br>3-beta-glucanase, secreted                                     |
| 593 | <i>sav_6024</i> | <i>lpdA1</i> | <u>GCCGACCGGTCACTGACGACCGGC</u><br><u>GCCGCTCTTCTTCGGC</u>                                                                                                                                                                                                                                       | putative dihydrolipoamide<br>dehydrogenase                                         |
| 594 | <i>sav_3340</i> | <i>lpdA3</i> | <u>GCCGCGTTCGCTGCC</u>                                                                                                                                                                                                                                                                           | putative dihydrolipoamide<br>dehydrogenase                                         |
| 595 | <i>sav_7348</i> | <i>lpdB</i>  | <u>GCCGAAGGCCGGCACCGGACCGCC</u><br><u>GCCGAGCGCCAGGGTGCTCTCCGCC</u><br><u>GCCGCCCCGGCCGAGCGGCCGCC</u><br><u>GCCGAGAGACGGCTTTGCCGCC</u><br><u>ACCGCCCCCTCGGC</u><br><u>GCCGCGGCCGCC</u><br><u>GCCGACCGCC</u><br><u>GCCGCTCGGC</u><br><u>GCCGCCGGACGGCCCCGGGCTGCC</u><br><u>GCCGCGGCCATTACCGGC</u> | putative dihydrolipoamide<br>dehydrogenase                                         |
| 596 | <i>sav_2981</i> | <i>maeB1</i> | <u>ACCGAAGATCTTCCGGC</u><br><u>GCCGACGAGATGTCTCCTGGC</u><br><u>ACCGCGTAGGCCAGCCGCC</u>                                                                                                                                                                                                           | putative malate dehydrogenase<br>(oxaloacetate-decarboxylating;<br>NADP-requiring) |
| 597 | <i>sav_5126</i> | <i>maeB2</i> | <u>ACCGACCCGCCATGCTCGCC</u><br><u>GCCGAAGGCCGCCGGGCCGCC</u><br><u>ACCGCGGAGTACGCGGTAGCCGCC</u>                                                                                                                                                                                                   | putative malate dehydrogenase<br>(oxaloacetate-decarboxylating;<br>NADP-requiring) |
| 598 | <i>sav_1514</i> | <i>malS1</i> | <u>ACCGATCGCC</u><br><u>ACCGCACTTCAGGC</u><br><u>ACCGAAGGTGACCGGGACTCGCC</u>                                                                                                                                                                                                                     | putative malate dehydrogenase<br>(oxaloacetate-decarboxylating;<br>NAD-requiring)  |
| 599 | <i>sav_3870</i> | <i>malS2</i> | <u>GCCGATACCGGCCGGTACCGGC</u><br><u>ACCGCCCCGCCGCC</u><br><u>GCCGATATCAGTCGTTACCTGCC</u>                                                                                                                                                                                                         | putative malate dehydrogenase<br>(oxaloacetate-decarboxylating;<br>NAD-requiring)  |
| 600 | <i>sav_5048</i> | <i>manB</i>  | <u>ACCGCGCCGGTCCCGGC</u><br><u>GCCGCTTCGGC</u><br><u>GCCGAGGCACCGCC</u><br><u>GCCGCGCCGGCCTACCGGACCGGC</u><br><u>ACCGCCTCCTTGCC</u><br><u>GCCGAAACGGCCCGCGCCGCC</u><br><u>GCCGCGTCCTTACCGGATCGGC</u><br><u>ACCGACAGTCGGCGGTGCCTCGGC</u>                                                          | putative phosphomannomutase                                                        |
| 601 | <i>sav_3436</i> | <i>mdh</i>   | <u>GCCGCCGAGCCAGCC</u><br><u>GCCGCCCCGACCCCTGGGCAGGC</u>                                                                                                                                                                                                                                         | putative malate/lactate<br>dehydrogenase                                           |
| 602 | <i>sav_358</i>  | <i>mpg1</i>  | <u>ACCGACCGACAACGGAGTCCGCC</u>                                                                                                                                                                                                                                                                   | putative mannose-1-phosphate<br>guanyltransferase                                  |
| 603 | <i>sav_6977</i> | <i>mpg3</i>  | <u>GCCGCCAATCAGGC</u>                                                                                                                                                                                                                                                                            | putative mannose-1-phosphate<br>guanyltransferase                                  |

|     |                 |              |                                                                                                                                                                                                                                               |                                                                              |
|-----|-----------------|--------------|-----------------------------------------------------------------------------------------------------------------------------------------------------------------------------------------------------------------------------------------------|------------------------------------------------------------------------------|
| 604 | <i>sav_1842</i> | <i>neuA1</i> | <u>GCCGAGACCTGGC</u><br><u>ACCGCCGCCCTGGGGAACCGGC</u>                                                                                                                                                                                         | putative neuraminidase,<br>secreted                                          |
| 605 | <i>sav_5934</i> | <i>neuA3</i> | <u>GCCGCAACCGGC</u>                                                                                                                                                                                                                           | putative neuraminidase                                                       |
| 606 | <i>sav_2822</i> | <i>pfkA1</i> | <u>GCCGCGAAAATCACCGCC</u>                                                                                                                                                                                                                     | 6-phosphofructokinase                                                        |
| 607 | <i>sav_6083</i> | <i>pfkA2</i> | <u>GCCGCGGTTGCC</u>                                                                                                                                                                                                                           | 6-phosphofructokinase                                                        |
| 608 | <i>sav_803</i>  | <i>pgmA</i>  | <u>GCCGCGGAACCGTCCCCCTCGCC</u><br><u>GCCGAGTTGAGAGAGGACCGCC</u><br><u>GCCGACCTTCCGGCTGCC</u><br><u>GCCGACCACGGGGTGCCTCTCGCC</u><br><u>GCCGAACTGTCCGCC</u><br><u>ACCGCACGGCTGCCATGCCGAGCC</u>                                                  | putative phosphoglucomutase                                                  |
| 609 | <i>sav_3343</i> | <i>pmmB</i>  | <u>GCCGCCGCGGGACGCGTGCCGCC</u>                                                                                                                                                                                                                | putative phosphomannomutase                                                  |
| 610 | <i>sav_3566</i> | <i>ppc</i>   | <u>GCCGCCCGGC</u><br><u>GCCGCCGGGCGGCGCACTGCC</u>                                                                                                                                                                                             | putative phosphoenolpyruvate<br>carboxylase                                  |
| 611 | <i>sav_2825</i> | <i>pykA1</i> | <u>ACCGATAGGATCGCC</u>                                                                                                                                                                                                                        | putative pyruvate kinase                                                     |
| 612 | <i>sav_5317</i> | <i>rbsK</i>  | <u>GCCGCTCGGC</u>                                                                                                                                                                                                                             | putative ribokinase                                                          |
| 613 | <i>sav_5705</i> | <i>scrK1</i> | <u>GCCGCGTCGCC</u><br><u>GCCGAGAGAGAGCAGCC</u>                                                                                                                                                                                                | putative fructokinase                                                        |
| 614 | <i>sav_3395</i> | <i>sdhC1</i> | <u>ACCGACATCGAAGCCGGCAGGC</u><br><u>ACCGATGTGATCGAACTGGC</u>                                                                                                                                                                                  | putative succinate<br>dehydrogenase cytochrome<br>b-556 subunit (complex II) |
| 615 | <i>sav_1818</i> | <i>sucC1</i> | <u>ACCGCTCCGGC</u><br><u>ACCGATGGCTTTCGGCCCGCC</u>                                                                                                                                                                                            | putative succinyl-CoA<br>synthetase beta subunit                             |
| 616 | <i>sav_372</i>  | <i>suhB2</i> | <u>ACCGCACAGTCCGGC</u>                                                                                                                                                                                                                        | putative myo-inositol<br>1-monophosphatase                                   |
| 617 | <i>sav_6314</i> | <i>tal2</i>  | <u>ACCGCGACCGCC</u><br><u>GCCGCACGGCCGGCACGCGTCGGC</u><br><u>GCCGACGCGTGCCGGC</u>                                                                                                                                                             | putative transaldolase                                                       |
| 618 | <i>sav_7177</i> | <i>thcA</i>  | <u>ACCGCGCCCCGCC</u><br><u>GCCGAGAGCTGCC</u>                                                                                                                                                                                                  | putative aldehyde<br>dehydrogenase                                           |
| 619 | <i>sav_1766</i> | <i>tkt1</i>  | <u>ACCGACAGCAGGGCCGAGCCGCC</u>                                                                                                                                                                                                                | putative transketolase                                                       |
| 620 | <i>sav_6315</i> | <i>tkt2</i>  | <u>GCCGACCTCCGGATCAGCC</u><br><u>GCCGATGTGCTTGGCGCCACCGGC</u>                                                                                                                                                                                 | putative transketolase                                                       |
| 621 | <i>sav_4462</i> | <i>wbpA</i>  | <u>GCCGCGAGCTGCC</u><br><u>ACCGCGTCACCGGC</u>                                                                                                                                                                                                 | UDP-glucose/GDP-mannose<br>dehydrogenase                                     |
| 622 | <i>sav_1126</i> | <i>xylB2</i> | <u>GCCGCACGGCGAACCGGC</u>                                                                                                                                                                                                                     | putative xylulose kinase                                                     |
| 623 | <i>sav_5283</i> | <i>xylB3</i> | <u>GCCGACAACACCGGC</u><br><u>ACCGCCGCCTCTGCC</u><br><u>GCCGCACCGCCGCTTCTGCC</u><br><u>GCCGCACCACCACCCAGCC</u><br><u>GCCGCACCGCCACCCAGCCCGCC</u><br><u>GCCGCGCCGCACCGCCCCACCGGC</u><br><u>GCCGCCCCGCCGGTGTGTCTCGGC</u><br><u>GCCGCCGCTTGCC</u> | putative xylulose kinase                                                     |

|     |                 |              |                                                                                                                                                       |                                                                       |
|-----|-----------------|--------------|-------------------------------------------------------------------------------------------------------------------------------------------------------|-----------------------------------------------------------------------|
| 624 | <i>sav_2096</i> | <i>xynA1</i> | <u>GCCGCGCACAGGCCTGCC</u><br><u>GCCGCGGGCGCGGGCAGGTTGCC</u>                                                                                           | putative endo-1,4-beta<br>xylanase, secreted                          |
| 625 | <i>sav_4984</i> | <i>xynA2</i> | <u>GCCGCTTCCGTATTCGCC</u><br><u>ACCGAAACTTTCGGAGGCACCCGCC</u><br><u>ACCGATTGGC</u>                                                                    | putative endo-1,4-beta<br>xylanase, secreted                          |
| 626 | <i>sav_6372</i> | <i>xynB3</i> | <u>GCCGATTCCCGCCGATACTGTTGCC</u><br><u>ACCGCACTGCTCGGC</u><br><u>GCCGCTCTGGC</u>                                                                      | putative xylan beta-1,<br>4-xylosidase                                |
| 627 | <i>sav_6381</i> | <i>xynD</i>  | <u>GCCGCCCCGGC</u><br><u>GCCGCCACTGCCGAAAGGGTTGCC</u>                                                                                                 | putative<br>endo-1,4-beta-xylanase,<br>secreted                       |
| 628 | <i>sav_828</i>  |              | <u>ACCGCCGAATCGGACAGCC</u><br><u>GCCGCGCCCGCGCCACGTCTGCC</u><br><u>ACCGCGTCCGCCTCGCC</u><br><u>GCCGATTCCAGCACACTCGCC</u><br><u>GCCGACGATCAGGCAGCC</u> | putative rhamnosidase                                                 |
| 629 | <i>sav_1324</i> |              | <u>GCCGCGGGACCGGC</u>                                                                                                                                 | putative arabinogalactan<br>endo-1, 4-beta-galactosidase,<br>secreted |
| 630 | <i>sav_1405</i> |              | <u>GCCGACGGCACGAGCCTCGCC</u><br><u>GCCGCACCTCACGCACCGGCCGCC</u><br><u>GCCGCGTGCAGGGGCCCGCC</u>                                                        | putative amidohydrolase                                               |
| 631 | <i>sav_1459</i> |              | <u>GCCGAGCCGGCACAGGC</u><br><u>GCCGCCTCAGCC</u>                                                                                                       | putative glycogen debranching<br>enzyme                               |
| 632 | <i>sav_1623</i> |              | <u>ACCGCACTCCGGC</u><br><u>GCCGAGGCGCCGGC</u>                                                                                                         | putative transketolase A<br>subunit                                   |
| 633 | <i>sav_1624</i> |              | <u>GCCGCGCCCGTCCGTCGGC</u><br><u>ACCGCACAGCACTCGCCGCCCGCC</u>                                                                                         | putative transketolase B<br>subunit                                   |
| 634 | <i>sav_1980</i> |              | <u>GCCGCGGCGTGAGGCAGAATCGGC</u><br><u>GCCGATTCTGCC</u>                                                                                                | putative carbohydrate kinase                                          |
| 635 | <i>sav_2009</i> |              | <u>GCCGCAGGTCCGGC</u>                                                                                                                                 | putative mutase                                                       |
| 636 | <i>sav_2087</i> |              | <u>GCCGCGGTCGCAACCGGCCGCC</u><br><u>ACCGAGAGTTGCGTAACCGCC</u><br><u>ACCGAGCCGGGAGGGGGCCTGCC</u><br><u>ACCGCCCGGC</u>                                  | putative cellulose-binding<br>protein                                 |
| 637 | <i>sav_2108</i> |              | <u>GCCGCTAGCGGTACGGTCCAGCC</u>                                                                                                                        | putative rhamnogalacturonase<br>B precursor, secreted                 |
| 638 | <i>sav_2109</i> |              | <u>GCCGACCGCC</u><br><u>GCCGCATGAGCCGCACAAGCCGCC</u><br><u>GCCGCCCGGC</u><br><u>ACCGGATTTTCTGCTATCGGC</u>                                             | putative beta-xylosidase,<br>secreted                                 |
| 639 | <i>sav_2574</i> |              | <u>GCCGCACGATGTCACAGCC</u><br><u>GCCGCGTGGGCGCGACCGCC</u>                                                                                             | putative secreted endo-1,<br>4-beta-glucanase                         |
| 640 | <i>sav_2804</i> |              | <u>ACCGACCCGCC</u>                                                                                                                                    | putative pep2 protein                                                 |

|                                             |                 |              |                                                                                                                                      |                                                      |
|---------------------------------------------|-----------------|--------------|--------------------------------------------------------------------------------------------------------------------------------------|------------------------------------------------------|
| 641                                         | <i>sav_3050</i> |              | <u>ACCGAAGGGCGTGCGCCGGC</u><br><u>GCCGAAGGGTGCGCCGGC</u><br><u>GCCGCTCGCC</u><br><u>GCCGATCTTCGCCGGC</u>                             | putative fructose-1,<br>6-bisphosphatase             |
| 642                                         | <i>sav_3483</i> |              | <u>ACCGAACGCCCCCACCCTCCGCC</u>                                                                                                       | putative phosphoglycerate<br>mutase                  |
| 643                                         | <i>sav_3908</i> |              | <u>ACCGCCCAGGATGGGCACCGCC</u>                                                                                                        | putative hydrolase                                   |
| 644                                         | <i>sav_3924</i> |              | <u>GCCGCGGGTTCGCC</u>                                                                                                                | putative sugar phosphate<br>isomerase                |
| 645                                         | <i>sav_4650</i> |              | <u>ACCGACGTTCGATCGGGTGTCCGCC</u>                                                                                                     | putative aldehyde<br>dehydrogenase                   |
| 646                                         | <i>sav_4732</i> |              | <u>GCCGCGAGAGCGCGTTCTGCCGGC</u><br><u>GCCGAACGGGAACCTCGTCCGGC</u><br><u>ACCGATGTAGGC</u>                                             | putative NAD-dependent<br>epimerase/dehydratase      |
| 647                                         | <i>sav_5245</i> |              | <u>GCCGAGATCGCCCGCGGGTTGCC</u>                                                                                                       | putative mutase                                      |
| 648                                         | <i>sav_6969</i> |              | <u>GCCGCGTGCCGCGCACACCCAGCC</u>                                                                                                      | putative glycosyl hydrolase                          |
| <b>Fatty acid and lipid metabolism (75)</b> |                 |              |                                                                                                                                      |                                                      |
| 649                                         | <i>sav_3337</i> | <i>accA3</i> | <u>ACCGCGGGACAAGAGGTCTGCC</u><br><u>GCCGAGTTTAGGGACTGCC</u>                                                                          | putative acyl-CoA carboxylase,<br>alpha subunit      |
| 650                                         | <i>sav_3331</i> | <i>accD4</i> | <u>GCCGAAAGGTATCGCCGCC</u>                                                                                                           | putative acyl-CoA carboxylase,<br>beta subunit       |
| 651                                         | <i>sav_4964</i> | <i>acpS</i>  | <u>ACCGCGGCGCCCCCGCC</u>                                                                                                             | putative holo-ACP synthase                           |
| 652                                         | <i>sav_2890</i> | <i>crrA1</i> | <u>ACCGAGCGGTCCCCAGGATCCCGGC</u>                                                                                                     | crotonyl-CoA reductase                               |
| 653                                         | <i>sav_1911</i> | <i>crrA2</i> | <u>GCCGCGTGTCCCCACCGCC</u>                                                                                                           | putative crotonyl-CoA<br>reductase                   |
| 654                                         | <i>sav_524</i>  | <i>cdh</i>   | <u>ACCGAGGCTGATTTCCGGC</u><br><u>ACCGACTGCC</u><br><u>ACCGCATGCCCTCTTCGGC</u>                                                        | putative CDP-diacylglycerol<br>phosphatidylhydrolase |
| 655                                         | <i>sav_3528</i> | <i>cfa</i>   | <u>ACCGAACAGCC</u>                                                                                                                   | putative cyclopropane fatty<br>acid synthase         |
| 656                                         | <i>sav_1064</i> | <i>clsA</i>  | <u>GCCGCGACGCTTCGCC</u><br><u>GCCGCCCTCCACCACCGGTCGGC</u><br><u>ACCGCGGAGCGCAAACCTGGC</u>                                            | putative phospholipase                               |
| 657                                         | <i>sav_6102</i> | <i>crtI2</i> | <u>GCCGATAAAGTCCCTGGC</u>                                                                                                            | putative phytoene<br>dehydrogenase                   |
| 658                                         | <i>sav_1285</i> | <i>dak1</i>  | <u>GCCGAACAACGAGTTCGGC</u><br><u>GCCGATACTGCC</u><br><u>GCCGAACTCGTTGTTCGGC</u>                                                      | putative dihydroxyacetone<br>kinase subunit I        |
| 659                                         | <i>sav_2674</i> | <i>dak3</i>  | <u>ACCGCGCCGCCCCGCGCCCTTGCC</u><br><u>GCCGCCGGGTGGTCCGGC</u><br><u>GCCGCTGGCAAGGGCGCGGGCCGGC</u><br><u>GCCGCAAGAGCGCCGCGAGACCGCC</u> | putative dihydroxyacetone<br>kinase                  |
| 660                                         | <i>sav_635</i>  | <i>echA2</i> | <u>ACCGAGCTGGAATCGAACATCTGCC</u><br><u>GCCGAAGCTCATCGCC</u>                                                                          | putative enoyl-CoA hydratase                         |

|     |                 |               |                                                                                                                                                                                          |                                                                     |
|-----|-----------------|---------------|------------------------------------------------------------------------------------------------------------------------------------------------------------------------------------------|---------------------------------------------------------------------|
| 661 | <i>sav_2316</i> | <i>echA7</i>  | <u>GCCGCGCCCGGCTGTGCCCGCC</u><br><u>ACCGACAGCCGCCCGCC</u><br><u>ACCGAGTCACGGCTTCTCGATAGCC</u><br><u>ACCGCGGATAGCTGTGTCCCGGC</u>                                                          | putative enoyl-CoA hydratase                                        |
| 662 | <i>sav_3327</i> | <i>echA9</i>  | <u>GCCGATGCCGCGGGCGTCGGC</u><br><u>GCCGCCCCCTCCGGTGTCCGCC</u><br><u>GCCGCCC GGATGCCGCC</u><br><u>GCCGACGCCCGCGGCATCGGC</u><br><u>ACCGACCGCGAGCCACCGGC</u><br><u>GCCGACCGCGAGCCACCGGC</u> | putative enoyl-CoA hydratase                                        |
| 663 | <i>sav_6428</i> | <i>echA14</i> | <u>ACCGAAGCCGATGGACCGCGCCGGC</u>                                                                                                                                                         | putative enoyl-CoA<br>hydratase/isomerase                           |
| 664 | <i>sav_4544</i> | <i>eutB</i>   | <u>GCCGCCCCGGC</u>                                                                                                                                                                       | putative ethanolamine<br>ammonia-lyase large subunit                |
| 665 | <i>sav_2944</i> | <i>fabB2</i>  | <u>GCCGCGCCGGTTCGGC</u><br><u>GCCGACAGGCGACCGTGACCTGCC</u><br><u>ACCGACGTGACGACCGGAATCCGGC</u><br><u>GCCGACCGGC</u>                                                                      | putative 3-oxoacyl-ACP<br>synthase II                               |
| 666 | <i>sav_6136</i> | <i>fabG6</i>  | <u>ACCGCCC GCTTCAGCC</u>                                                                                                                                                                 | putative 3-oxoacyl-ACP<br>reductase                                 |
| 667 | <i>sav_6462</i> | <i>fabG7</i>  | <u>GCCGCCCCGGC</u>                                                                                                                                                                       | putative 3-oxoacyl-ACP<br>reductase                                 |
| 668 | <i>sav_1831</i> | <i>fabH2</i>  | <u>GCCGACAAGCCTGCCGCC</u><br><u>GCCGATCAGGGCCCGGC</u>                                                                                                                                    | putative 3-oxoacyl-ACP<br>synthase III                              |
| 669 | <i>sav_827</i>  | <i>fabH6</i>  | <u>GCCGACACCGGCCGCC</u><br><u>ACCGACGGCGACCCGGC</u>                                                                                                                                      | putative 3-oxoacyl-ACP<br>synthase III                              |
| 670 | <i>sav_3512</i> | <i>fadA2</i>  | <u>GCCGCCCCCGGCGCCCGCTTCGGC</u><br><u>GCCGCCCCCGGC</u>                                                                                                                                   | putative 3-ketoacyl-CoA<br>thiolase/acetyl-CoA<br>acetyltransferase |
| 671 | <i>sav_1681</i> | <i>fadA4</i>  | <u>ACCGCGCCCGGCAGAGCCCGGC</u>                                                                                                                                                            | putative 3-ketoacyl-CoA<br>thiolase/acetyl-CoA<br>acetyltransferase |
| 672 | <i>sav_1384</i> | <i>fadA5</i>  | <u>ACCGCGAGCATGCCACCCCGGC</u><br><u>GCCGCGCCGCAGTTGGC</u><br><u>ACCGCCTACCGGCATCGAGCCCGGC</u><br><u>GCCGCTGCCCCTGGAGACCGGC</u><br><u>GCCGCCATIGCC</u><br><u>GCCGCAGGGGTGACGGGAGTCGGC</u> | putative 3-ketoacyl-CoA<br>thiolase/acetyl-CoA<br>acetyltransferase |
| 673 | <i>sav_7026</i> | <i>fadA6</i>  | <u>ACCGATTGGTCTCGGC</u>                                                                                                                                                                  | putative 3-ketoacyl-CoA<br>thiolase/acetyl-CoA<br>acetyltransferase |
| 674 | <i>sav_5842</i> | <i>fadA7</i>  | <u>GCCGCGCCCCITGCC</u><br><u>GCCGCAAGGGTCTTGACAGCC</u>                                                                                                                                   | putative 5-ketoacyl-CoA<br>thiolase/acetyl-CoA<br>acetyltransferase |

|     |                 |               |                                                                                                                 |                                                                 |
|-----|-----------------|---------------|-----------------------------------------------------------------------------------------------------------------|-----------------------------------------------------------------|
| 675 | <i>sav_1909</i> | <i>fadC1</i>  | <u>ACCGACCGGC</u>                                                                                               | putative 3-hydroxyacyl-CoA dehydrogenase                        |
| 676 | <i>sav_2870</i> | <i>fadC3</i>  | <u>ACCGCTAAGGTCCGCC</u>                                                                                         | putative 3-hydroxyacyl-CoA dehydrogenase                        |
| 677 | <i>sav_2889</i> | <i>fadC4</i>  | <u>ACCGAGGAGTCCGCCGCC</u>                                                                                       | putative 3-hydroxyacyl-CoA dehydrogenase                        |
| 678 | <i>sav_6748</i> | <i>fadC5</i>  | <u>ACCGACAACGGGGGCCCTGCC</u>                                                                                    | putative 3-hydroxyacyl-CoA dehydrogenase                        |
| 679 | <i>sav_716</i>  | <i>fadC6</i>  | <u>GCCGCCGCAGCC</u>                                                                                             | putative 3-hydroxyacyl-CoA dehydrogenase                        |
| 680 | <i>sav_377</i>  | <i>fadD1</i>  | <u>ACCGCCTCCACGAACGTCGCC</u>                                                                                    | putative acyl-CoA synthetase, long-chain fatty acid:CoA ligase  |
| 681 | <i>sav_1104</i> | <i>fadD3</i>  | <u>GCCGCGTAGCCGGACAGCC</u><br><u>GCCGAGGGTAGGC</u>                                                              | putative acyl-CoA synthetase, fatty acid: CoA ligase            |
| 682 | <i>sav_1258</i> | <i>fadD5</i>  | <u>GCCGAACCGCC</u><br><u>GCCGAACCGCC</u><br><u>GCCGATGACTCCGGTCGCTCCGGC</u><br><u>GCCGCCCCCTTCCGCCACCGTAGCC</u> | putative acyl-CoA synthetase, long-chain fatty acid: CoA ligase |
| 683 | <i>sav_1848</i> | <i>fadD8</i>  | <u>ACCGCTCATGCTCCCTCACTGCC</u>                                                                                  | putative acyl-CoA synthetase, long-chain fatty acid:CoA ligase  |
| 684 | <i>sav_4206</i> | <i>fadD9</i>  | <u>ACCGCGTAGGC</u><br><u>ACCGCAGGACGAACAGCC</u>                                                                 | putative acyl-CoA synthetase, long-chain fatty acid:CoA ligase  |
| 685 | <i>sav_4818</i> | <i>fadD10</i> | <u>GCCGCGGGCGACACCGGC</u><br><u>ACCGCCGGTGTTCGCC</u>                                                            | putative acyl-CoA synthetase, long-chain fatty acid:CoA ligase  |
| 686 | <i>sav_5562</i> | <i>fadD12</i> | <u>GCCGCAACCAGCCAGCC</u>                                                                                        | putative acyl-CoA synthetase, long-chain fatty acid:CoA ligase  |
| 687 | <i>sav_3806</i> | <i>fadD16</i> | <u>GCCGACAGTGCTGGC</u>                                                                                          | putative acyl-CoA synthetase, fatty acid: CoA ligase            |
| 688 | <i>sav_3841</i> | <i>fadD17</i> | <u>ACCGAGCCTTACGCTCTGCC</u>                                                                                     | putative acyl-CoA synthetase, fatty acid: CoA ligase            |
| 689 | <i>sav_6919</i> | <i>fadE2</i>  | <u>GCCGCTGGTCAGCAGCC</u><br><u>GCCGATGCTGCCGCC</u>                                                              | putative acyl-CoA dehydrogenase                                 |
| 690 | <i>sav_6542</i> | <i>fadE12</i> | <u>ACCGCTGTCCC GCC</u>                                                                                          | putative acyl-CoA dehydrogenase                                 |
| 691 | <i>sav_1267</i> | <i>fadE14</i> | <u>GCCGACGCCGCC</u>                                                                                             | putative acyl-CoA dehydrogenase                                 |
| 692 | <i>sav_1381</i> | <i>fadE15</i> | <u>GCCGCATCGGC</u><br><u>GCCGATGCGGCCAGGGCCGCC</u><br><u>GCCGATGGCACCGCC</u>                                    | putative acyl-CoA dehydrogenase                                 |

|     |                 |               |                                                                                                                         |                                                                                       |
|-----|-----------------|---------------|-------------------------------------------------------------------------------------------------------------------------|---------------------------------------------------------------------------------------|
| 693 | <i>sav_4212</i> | <i>fadE22</i> | <u>GCCGATGCGCTCCCATCGGC</u><br><u>GCCGATGGGAGCGCATCGGC</u><br><u>GCCGAAGCACCGCC</u>                                     | putative acyl-CoA<br>dehydrogenase                                                    |
| 694 | <i>sav_2123</i> | <i>fadE23</i> | <u>GCCGCGAGCCCTGGCCTACCGGC</u><br><u>ACCGCCTGGC</u>                                                                     | putative acyl-CoA<br>dehydrogenase                                                    |
| 695 | <i>sav_1292</i> | <i>fadH</i>   | <u>GCCGATGCCGGGGCCGGCGCCGGC</u><br><u>GCCGCGTGGCCGCCCTGCC</u><br><u>ACCGCGCACAGACCGGC</u><br><u>GCCGCGGCCCGGCATCGGC</u> | putative 2, 4-dienoyl-CoA<br>reductase                                                |
| 696 | <i>sav_2298</i> | <i>fadS2</i>  | <u>GCCGATCAGCC</u><br><u>GCCGCCC GCGTTCCGTCACCGCC</u><br><u>GCCGCGGGGGCTTGCCGCC</u>                                     | putative fatty acid desaturase                                                        |
| 697 | <i>sav_3567</i> | <i>fadS3</i>  | <u>ACCGCATAGGC</u><br><u>GCCGCAGGGGGCAACCGCC</u>                                                                        | putative fatty acid desaturase                                                        |
| 698 | <i>sav_719</i>  | <i>gcdH1</i>  | <u>GCCGCGCAGCGATGCTGTTGTCGCC</u>                                                                                        | putative glutaryl-CoA<br>dehydrogenase                                                |
| 699 | <i>sav_6664</i> | <i>glpK1</i>  | <u>ACCGCGCCGTAGATACAGCC</u>                                                                                             | putative glycerol kinase                                                              |
| 700 | <i>sav_4224</i> | <i>glpQ2</i>  | <u>ACCGAGAACAACAGCC</u><br><u>GCCGCGGACCCACAGCC</u>                                                                     | putative glycerophosphoryl<br>diester phosphodiesterase                               |
| 701 | <i>sav_6784</i> | <i>glpQ3</i>  | <u>GCCGCGCCCCGAACCCGGC</u>                                                                                              | putative glycerophosphoryl<br>diester phosphodiesterase                               |
| 702 | <i>sav_1492</i> | <i>glpQ5</i>  | <u>GCCGAGCCGCC</u>                                                                                                      | putative glycerophosphoryl<br>diester phosphodiesterase                               |
| 703 | <i>sav_3460</i> | <i>icmB</i>   | <u>GCCGCGAAACTGCC</u><br><u>GCCGCACCACTCCGCCGCC</u>                                                                     | isobutyryl-CoA mutase, chain<br>B                                                     |
| 704 | <i>sav_7089</i> | <i>lpsA1</i>  | <u>GCCGCATCGGTGAAATCGCC</u>                                                                                             | putative secreted lipase                                                              |
| 705 | <i>sav_3807</i> | <i>ltp2</i>   | <u>GCCGACAGTGCTGGC</u>                                                                                                  | putative nonspecific<br>lipid-transfer protein                                        |
| 706 | <i>sav_1682</i> | <i>mcr</i>    | <u>ACCGAGGTGTGCGTCATCCTCGGC</u><br><u>ACCGCTCGCACCTCACGCTAGCC</u>                                                       | putative fatty acid-CoA<br>racemase                                                   |
| 707 | <i>sav_1604</i> | <i>pcaF1</i>  | <u>ACCGACGGCGGGCGGTGCACCTGCC</u><br><u>ACCGCCCCGCC</u>                                                                  | putative beta-ketoadipyl-CoA<br>thiolase                                              |
| 708 | <i>sav_6826</i> | <i>pgsA2</i>  | <u>ACCGCGGGCGTCATCGGAGCCGCC</u>                                                                                         | putative<br>phosphatidylglycerophosphate<br>synthase                                  |
| 709 | <i>sav_6976</i> | <i>pgsA3</i>  | <u>GCCGA ACTTCTTTTAGAGCTCCGGC</u>                                                                                       | putative<br>CDP-diacylglycerol-glycerol-3<br>-phosphate<br>3-phosphatidyl-transferase |
| 710 | <i>sav_1658</i> | <i>pgsA5</i>  | <u>GCCGCTCCGCC</u>                                                                                                      | putative<br>phosphatidylglycerophosphate<br>synthase                                  |
| 711 | <i>sav_2681</i> | <i>plsC2</i>  | <u>GCCGCACAAGTGTCGCCCCAGGC</u>                                                                                          | putative<br>1-acylglycerol-3-phosphate                                                |

|                                   |                 |              |                                                                                                                                                                                        |                                                                                  |
|-----------------------------------|-----------------|--------------|----------------------------------------------------------------------------------------------------------------------------------------------------------------------------------------|----------------------------------------------------------------------------------|
| 712                               | <i>sav_6080</i> | <i>plsC3</i> | <u>ACCGACCAGGGTCGTCGGC</u>                                                                                                                                                             | O-acyltransferase<br>putative<br>1-acylglycerol-3-phosphate                      |
| 713                               | <i>sav_6783</i> | <i>plsC4</i> | <u>GCCGCGCCCCGAACCCGGC</u>                                                                                                                                                             | O-acyltransferase<br>putative<br>1-acylglycerol-4-phosphate                      |
| 714                               | <i>sav_7311</i> | <i>plsC7</i> | <u>GCCGCGACCCCGCTCCCCGGC</u><br><u>GCCGCCCCGGC</u><br><u>ACCGACGACCGCGGCTGTGCCGGC</u><br><u>GCCGCGGTCGTCGGTCGGACCCGGC</u><br><u>GCCGCGCCGTCGGC</u><br><u>ACCGACACGGGACCAGGAACCCGGC</u> | O-acyltransferase<br>putative<br>1-acylglycerol-3-phosphate<br>O-acyltransferase |
| 715                               | <i>sav_1916</i> | <i>psd</i>   | <u>GCCGCCGACTCGGCTTCTTGGC</u><br><u>GCCGAGTCGGC</u>                                                                                                                                    | putative phosphatidylserine<br>decarboxylase                                     |
| 716                               | <i>sav_3237</i> | <i>uppS1</i> | <u>ACCGACGTCAGGCCGCCCGTCGCC</u><br><u>ACCGCCATACGGACAGGC</u><br><u>ACCGCCATCCGGACAGGGATCGCC</u><br><u>ACCGCCGAAACGCCCGGC</u>                                                           | putative undecaprenyl<br>diphosphate synthase                                    |
| 717                               | <i>sav_5629</i> | <i>uppS2</i> | <u>GCCGATGCGCGGGCGCCGTAGGC</u>                                                                                                                                                         | putative undecaprenyl<br>diphosphate synthase                                    |
| 718                               | <i>sav_1346</i> |              | <u>GCCGACCCGGAGCACATCGCTCGCC</u><br><u>ACCGACCCCCGCGCCGGC</u><br><u>GCCGCGCACAAGGACCCGGC</u><br><u>ACCGCGCCGGC</u>                                                                     | putative acyl-CoA synthetase                                                     |
| 719                               | <i>sav_2155</i> |              | <u>GCCGCGGAGGGAGCCGGACCCGCC</u>                                                                                                                                                        | putative 3-hydroxyacyl-CoA<br>dehydrogenase                                      |
| 720                               | <i>sav_2388</i> |              | <u>GCCGCCCTGGCCGCC</u><br><u>GCCGAATTGCC</u>                                                                                                                                           | putative phosphopantetheinyl<br>transferase                                      |
| 721                               | <i>sav_3120</i> |              | <u>GCCGCCGCACGGACTTCTGCC</u>                                                                                                                                                           | putative enoyl-CoA<br>hydratase/isomerase                                        |
| 722                               | <i>sav_3461</i> |              | <u>GCCGCTACGAGGTAGCC</u><br><u>GCCGCACACGCACCGTCGGC</u><br><u>GCCGACGGGAGGTCCGGC</u><br><u>GCCGACCTCCCCGTCGGC</u>                                                                      | putative lipase                                                                  |
| 723                               | <i>sav_6182</i> |              | <u>ACCGCGGCGCGGGCAGCC</u><br><u>ACCGACGGGCAGCC</u>                                                                                                                                     | putative acyl-CoA<br>transferases/carnitine<br>dehydratase                       |
| <b>Nucleotide metabolism (34)</b> |                 |              |                                                                                                                                                                                        |                                                                                  |
| 724                               | <i>sav_2595</i> | <i>add2</i>  | <u>ACCGCGTCCGCC</u><br><u>ACCGATCAGCC</u><br><u>ACCGCAGCCCGGC</u><br><u>GCCGAACCCGTGGGCACCCCCGGC</u>                                                                                   | putative adenosine deaminase                                                     |
| 725                               | <i>sav_6768</i> | <i>apbE2</i> | <u>GCCGACGGGCCCCGGC</u>                                                                                                                                                                | putative thiamine biosynthesis                                                   |



|     |                 |              |                                                                                                                                                |                                                                       |
|-----|-----------------|--------------|------------------------------------------------------------------------------------------------------------------------------------------------|-----------------------------------------------------------------------|
| 726 | <i>sav_4180</i> | <i>cdd3</i>  | <u>GCCGCGGCATGACGCCCTGCC</u><br><u>ACCGCCCGGCGGCCGCC</u><br><u>GCCGAGGGGACATGGCCCTCGCC</u><br><u>GCCGCGGCCGCGGGTCCGGC</u><br><u>GCCGCTCGGC</u> | lipoprotein precursor<br>putative cytidine/deoxycytidine<br>deaminase |
| 727 | <i>sav_4806</i> | <i>cdd4</i>  | <u>GCCGCGCCCGGCCGCC</u>                                                                                                                        | putative cytidine/deoxycytidine<br>deaminase                          |
| 728 | <i>sav_1247</i> | <i>cpdA</i>  | <u>GCCGCGGGCCTTTGCC</u><br><u>GCCGCGTCGGC</u>                                                                                                  | putative cyclic nucleotide<br>phosphodiesterase                       |
| 729 | <i>sav_4464</i> | <i>dcd</i>   | <u>GCCGACAGGCTCGGCCCGGCCGGC</u><br><u>GCCGAGCCTGTTCGGC</u><br><u>GCCGCTGCTACCGCTGCTGCC</u>                                                     | putative 2'-deoxycytidine<br>5'-triphosphate deaminase                |
| 730 | <i>sav_3365</i> | <i>deoA</i>  | <u>GCCGCACAGGC</u>                                                                                                                             | putative thymidine<br>phosphorylase                                   |
| 731 | <i>sav_3342</i> | <i>deoD</i>  | <u>GCCGCTGACCGCC</u><br><u>GCCGCGCTCCGTGGGACTTCTCGCC</u>                                                                                       | putative purine nucleoside<br>phosphorylase                           |
| 732 | <i>sav_1949</i> | <i>dht</i>   | <u>ACCGACCGCC</u><br><u>GCCGCCCCTGCACCGGACCGGC</u>                                                                                             | putative dihydropyrimidinase                                          |
| 733 | <i>sav_5649</i> | <i>dus</i>   | <u>GCCGCGAGGCGCCCGGC</u>                                                                                                                       | putative dihydrouridine<br>synthase                                   |
| 734 | <i>sav_3479</i> | <i>guaA</i>  | <u>ACCGCGCGCCCGCAGGCCCGCC</u>                                                                                                                  | putative GMP synthase                                                 |
| 735 | <i>sav_5000</i> | <i>guaB1</i> | <u>GCCGAGCGGCAGCC</u><br><u>GCCGCTCGGC</u><br><u>GCCGCCCCGGC</u><br><u>ACCGCCTCACTGCTCGCC</u>                                                  | putative<br>inosine-5'-monophosphate<br>dehydrogenase                 |
| 736 | <i>sav_6823</i> | <i>hit</i>   | <u>GCCGCGAGGTTTCGCC</u>                                                                                                                        | putative histidine triad (HIT)<br>family protein                      |
| 737 | <i>sav_6267</i> | <i>inda</i>  | <u>GCCGCCCCGCC</u>                                                                                                                             | putative pigment biosynthetic<br>protein                              |
| 738 | <i>sav_3679</i> | <i>mtaP</i>  | <u>GCCGAAACACCGAAGACCCCGCC</u>                                                                                                                 | putative methylthioadenosine<br>phosphorylase                         |
| 739 | <i>sav_3026</i> | <i>nrdL</i>  | <u>GCCGCCGGGAAATCCGGC</u><br><u>GCCGACCGGC</u><br><u>GCCGCCGGATTTCGGC</u>                                                                      | putative<br>ribonucleoside-diphosphate<br>reductase alpha chain       |
| 740 | <i>sav_3530</i> | <i>ppx1</i>  | <u>GCCGCGCCCCCAGGC</u><br><u>GCCGATCGCCGCC</u>                                                                                                 | putative exopolyphosphatase                                           |
| 741 | <i>sav_3562</i> | <i>prsA1</i> | <u>GCCGCGCGAACTCGCTGCTCGCC</u>                                                                                                                 | putative ribose-phosphate<br>pyrophosphokinase                        |
| 742 | <i>sav_7506</i> | <i>pucA</i>  | <u>GCCGCGAGCGGCGCCGGATCGCC</u>                                                                                                                 | putative xanthine<br>dehydrogenase                                    |
| 743 | <i>sav_1540</i> | <i>pucE</i>  | <u>ACCGATCGCCCACCGGC</u><br><u>ACCGCCCCCTTCGGC</u>                                                                                             | putative xanthine<br>dehydrogenase                                    |
| 744 | <i>sav_1996</i> | <i>pucH</i>  | <u>ACCGACCGACAGGTAGGC</u>                                                                                                                      | putative allantoinase                                                 |

|     |                 |             |                                                                                                                  |                                                                                      |
|-----|-----------------|-------------|------------------------------------------------------------------------------------------------------------------|--------------------------------------------------------------------------------------|
| 745 | <i>sav_5021</i> | <i>purK</i> | <u>ACCGACAGGGGCTGGC</u>                                                                                          | phosphoribosylaminoimidazole<br>carboxylase ATPase subunit                           |
| 746 | <i>sav_3445</i> | <i>purN</i> | <u>GCCGACCGGCAGCAACGATAACCGGC</u>                                                                                | phosphoribosylglycinamide<br>formyltransferase                                       |
| 747 | <i>sav_4140</i> | <i>purS</i> | <u>GCCGATACTTTCCCAATTACAGCC</u>                                                                                  | putative<br>phosphoribosylformylglycinam<br>idine (FGAM) synthase, PurS<br>component |
| 748 | <i>sav_3846</i> | <i>purU</i> | <u>GCCGACTGCGTAGCC</u>                                                                                           | putative formyltetrahydrofolate<br>deformylase                                       |
| 749 | <i>sav_4522</i> | <i>pyrE</i> | <u>GCCGCGCGGCGCCGTCTACCCTGGC</u>                                                                                 | putative orotate<br>phosphoribosyltransferase                                        |
| 750 | <i>sav_6504</i> | <i>pyrG</i> | <u>GCCGCTCCCGGC</u>                                                                                              | putative CTP synthetase                                                              |
| 751 | <i>sav_6840</i> | <i>relA</i> | <u>GCCGCAGTGGCCCTCCCGACAGGC</u>                                                                                  | ppGpp synthetase                                                                     |
| 752 | <i>sav_2472</i> | <i>rshA</i> | <u>GCCGCATTCGGC</u><br><u>GCCGCAATGTCTTACGGCCCGGC</u><br><u>GCCGACCGTGGATTTCGAACCGGC</u><br><u>ACCGCCTCTCGCC</u> | putative RelA homolog                                                                |
| 753 | <i>sav_2517</i> | <i>thyX</i> | <u>GCCGAATTCGCAGAAGTTCGGC</u><br><u>GCCGAACTTCTGCGAATTCGGC</u>                                                   | putative thymidylate synthase                                                        |
| 754 | <i>sav_4622</i> | <i>tmk</i>  | <u>GCCGCCCTCCGGGGAGGCCCGCC</u>                                                                                   | putative thymidylate kinase                                                          |
| 755 | <i>sav_1953</i> |             | <u>GCCGCACGGCCGGC</u><br><u>GCCGCTCCTTTGCC</u>                                                                   | putative hydrolase                                                                   |
| 756 | <i>sav_4899</i> |             | <u>GCCGATCGCC</u>                                                                                                | putative hydrolase                                                                   |
| 757 | <i>sav_6707</i> |             | <u>ACCGCGGAGCGCACCTTGGC</u>                                                                                      | putative ribosomal<br>pseudouridine synthase                                         |

#### Membrane bioenergetics (35)

|     |                 |              |                                                                                               |                                                                                |
|-----|-----------------|--------------|-----------------------------------------------------------------------------------------------|--------------------------------------------------------------------------------|
| 758 | <i>sav_5039</i> | <i>cofE</i>  | <u>GCCGACGCACCCTCGTCGGC</u><br><u>GCCGCCGCGCGCACCGCGCCCGGC</u><br><u>GCCGACGAGGGTGCCTCGGC</u> | putative<br>F420-0:gamma-glutamyl ligase                                       |
| 759 | <i>sav_3794</i> | <i>cofG</i>  | <u>GCCGATGACGATCCCGGC</u>                                                                     | putative 7,<br>8-didemethyl-8-hydroxy-5-dea<br>zariboflavin synthase subunit 1 |
| 760 | <i>sav_6316</i> | <i>ctaB</i>  | <u>ACCGAGCGGCCTCGGACGCCTCGGC</u><br><u>GCCGCTGGCCCGGC</u>                                     | putative protoheme IX<br>farnesyltransferase (complex<br>IV)                   |
| 761 | <i>sav_6047</i> | <i>ctaC</i>  | <u>ACCGCGCGCTCGGC</u><br><u>ACCGACCAGCGAGGCCGAGCC</u>                                         | putative cytochrome c oxidase<br>subunit II (complex IV)                       |
| 762 | <i>sav_6537</i> | <i>ctaD2</i> | <u>ACCGCTTCCGACGGCCGCC</u>                                                                    | putative cytochrome c oxidase<br>subunit I (complex IV)                        |
| 763 | <i>sav_3899</i> | <i>ctpE</i>  | <u>GCCGCCCGCC</u>                                                                             | putative integral membrane<br>ATPase                                           |
| 764 | <i>sav_4260</i> | <i>cydA1</i> | <u>ACCGACCCAGGCCCTGCC</u><br><u>ACCGCGACCCTCGCC</u>                                           | putative cytochrome bd-I<br>oxidase subunit I (cytochrome                      |

|     |                 |              |                                                                                                                 |                                                                                         |
|-----|-----------------|--------------|-----------------------------------------------------------------------------------------------------------------|-----------------------------------------------------------------------------------------|
| 765 | <i>sav_1923</i> | <i>cydA2</i> | <u>GCCGCTGGCCGCC</u><br><u>GCCGAAGACATCGCCCCACCGGC</u>                                                          | bd complex)<br>putative cytochrome bd-I<br>oxidase subunit I (cytochrome<br>bd complex) |
| 766 | <i>sav_6113</i> | <i>cynT3</i> | <u>GCCGCGCACGCGGGGAGATTCCGGC</u>                                                                                | putative carbonic anhydrase                                                             |
| 767 | <i>sav_1941</i> | <i>fdh</i>   | <u>GCCGCCGCTCCGGC</u>                                                                                           | putative NAD-dependent<br>formate dehydrogenase                                         |
| 768 | <i>sav_582</i>  | <i>fdxA</i>  | <u>ACCGAAGAGATCAGCCGCACCGGC</u>                                                                                 | putative ferredoxin                                                                     |
| 769 | <i>sav_3129</i> | <i>fdxD</i>  | <u>GCCGCGCTCCC GCGCGCCAGGC</u><br><u>GCCGCCTGGC</u>                                                             | putative ferredoxin                                                                     |
| 770 | <i>sav_4276</i> | <i>fhbA</i>  | <u>GCCGCATTGGC</u>                                                                                              | putative flavohemoprotein                                                               |
| 771 | <i>sav_5953</i> | <i>fhbB</i>  | <u>GCCGACCTCGGC</u><br><u>GCCGAGGTCCGGCCGGC</u>                                                                 | putative flavohemoprotein                                                               |
| 772 | <i>sav_1481</i> | <i>fixA</i>  | <u>GCCGCCCCGACCGGGATCGGC</u>                                                                                    | putative electron transfer<br>flavoprotein, beta subunit                                |
| 773 | <i>sav_1507</i> | <i>fprB</i>  | <u>GCCGAAGCAGGGAGTCCCGCC</u>                                                                                    | putative NAD (P)H-ferredoxin<br>reductase                                               |
| 774 | <i>sav_6956</i> | <i>fprF</i>  | <u>GCCGCATGACGACGGCAACCGCC</u>                                                                                  | putative NAD (P)H-ferredoxin<br>reductase                                               |
| 775 | <i>sav_7367</i> | <i>hydB</i>  | <u>GCCGCACCTGACCCGCC</u>                                                                                        | putative cytochrome C3-like<br>[NiFe] hydrogenase large<br>subunit                      |
| 776 | <i>sav_7482</i> | <i>lldA</i>  | <u>GCCGCACACCCCGGC</u><br><u>GCCGCGGCTCGGC</u><br><u>GCCGAAATCCGTCCGTCCGCC</u><br><u>GCCGAGCCGCGGCTGCTCCGCC</u> | putative L-lactate<br>2-monooxygenase                                                   |
| 777 | <i>sav_1892</i> | <i>ndh1</i>  | <u>ACCGAGCCGGC</u><br><u>ACCGCCGTTCGGC</u><br><u>GCCGCCCTGCC</u><br><u>ACCGACCCGCC</u>                          | putative NADH dehydrogenase<br>(complex I)                                              |
| 778 | <i>sav_3229</i> | <i>ndh2</i>  | <u>ACCGAATCGTCGCCCAGCAGGC</u><br><u>GCCGAGCTGCGTACAGGC</u>                                                      | putative NADH dehydrogenase<br>(complex I)                                              |
| 779 | <i>sav_4109</i> | <i>ndh3</i>  | <u>GCCGCGCAGGGTTGGCCGAATTGCC</u>                                                                                | putative NADH dehydrogenase<br>(complex I)                                              |
| 780 | <i>sav_5661</i> | <i>nirB</i>  | <u>GCCGCTCCGCTCCCGCCGCCGCC</u><br><u>GCCGAGTTCGCC</u>                                                           | putative nitrite reductase (NAD<br>(P) H) large subunit                                 |
| 781 | <i>sav_4837</i> | <i>nuoA1</i> | <u>ACCGCTCATCCGGC</u>                                                                                           | putative NADH dehydrogenase<br>I chain A (complex I)                                    |
| 782 | <i>sav_4881</i> | <i>nuoA2</i> | <u>GCCGCGGCTCGCCGCCAGGC</u>                                                                                     | putative NADH dehydrogenase<br>I chain A (complex I)                                    |
| 783 | <i>sav_4661</i> | <i>ppa</i>   | <u>ACCGCGACCGGC</u><br><u>ACCGCGACTGGCGCGGACCGCC</u>                                                            | putative inorganic<br>pyrophosphatase                                                   |
| 784 | <i>sav_4069</i> | <i>ppk</i>   | <u>GCCGCTCCC GGCACGCGGCTCGGC</u><br><u>ACCGCACGGCTCGGCCCGGC</u>                                                 | putative polyphosphate kinase                                                           |

|                                                  |                 |              |                                                                                                                                                                          |                                                          |
|--------------------------------------------------|-----------------|--------------|--------------------------------------------------------------------------------------------------------------------------------------------------------------------------|----------------------------------------------------------|
| 785                                              | <i>sav_4037</i> | <i>sseA</i>  | <u>GCCGAGCCGTGCGGTCGCC</u><br><u>ACCGCCCCGGCCCCCTGGC</u><br><u>GCCGCGTCGCCGCC</u><br><u>GCCGCGTCGTACGCCACCAGGC</u><br><u>GCCGCACCTGCC</u><br><u>GCCGCTTCGTGAGGTCCGCC</u> | putative thiosulfate<br>sulfurtransferase                |
| 786                                              | <i>sav_1336</i> | <i>sseC</i>  | <u>GCCGA AACCATAACCCAGGC</u><br><u>ACCGCATGTCTTCGGC</u>                                                                                                                  | putative thiosulfate<br>sulfurtransferase                |
| 787                                              | <i>sav_1205</i> | <i>ssuDI</i> | <u>GCCGCGCCTGATCAGCCTGGCCGGC</u>                                                                                                                                         | putative alkanesulfonate<br>monooxygenase                |
| 788                                              | <i>sav_7243</i> | <i>trxB2</i> | <u>GCCGAACAAGCACGCGGTAGGC</u><br><u>GCCGACGTGCCCGCAGGTCAGGC</u>                                                                                                          | putative thioredoxin reductase                           |
| 789                                              | <i>sav_561</i>  |              | <u>ACCGCCCCGGC</u>                                                                                                                                                       | putative NADH<br>dehydrogenase/NAD(P)H<br>nitroreductase |
| 790                                              | <i>sav_589</i>  |              | <u>ACCGAATCTTCCGGC</u>                                                                                                                                                   | putative F420-dependent<br>dehydrogenase                 |
| 791                                              | <i>sav_1208</i> |              | <u>ACCGCCCCGTCCGCC</u><br><u>ACCGCGGCTCTTTTCCGGC</u><br><u>GCCGAATCCCTGACGCTGCC</u><br><u>GCCGACCCGCC</u><br><u>GCCGAGCGCATTCCAGCCGTAGGC</u><br><u>GCCGCATGTCAGCC</u>    | putative monooxygenase                                   |
| 792                                              | <i>sav_3213</i> |              | <u>GCCGCCCCTCGCCTGTCGCC</u><br><u>ACCGCTGGCCCCGGCTACCCGCC</u><br><u>GCCGCACCTGGGCGACAGGC</u>                                                                             | putative NADH<br>dehydrogenase/NAD(P)H<br>nitroreductase |
| <b>Metabolism of cofactors and vitamins (66)</b> |                 |              |                                                                                                                                                                          |                                                          |
| 793                                              | <i>sav_1833</i> | <i>apbA</i>  | <u>GCCGAGCCTTGGAGGCCGGTCCGGC</u>                                                                                                                                         | putative 2-dehydropantoate<br>2-reductase                |
| 794                                              | <i>sav_6088</i> | <i>bfrA</i>  | <u>GCCGCATCCTTGACCCGGC</u>                                                                                                                                               | putative bacterioferritin                                |
| 795                                              | <i>sav_5421</i> | <i>bioY</i>  | <u>GCCGATCACCGTCAGCC</u>                                                                                                                                                 | putative biotin synthase                                 |
| 796                                              | <i>sav_3330</i> | <i>birA</i>  | <u>GCCGA AAGGTATCGCCGCC</u>                                                                                                                                              | putative biotin apo-protein<br>ligase                    |
| 797                                              | <i>sav_4961</i> | <i>coaA</i>  | <u>ACCGCGTCCATACCTGGC</u>                                                                                                                                                | putative pantothenate kinase                             |
| 798                                              | <i>sav_6417</i> | <i>cobD</i>  | <u>GCCGCCGTA CTGGCTCCGGC</u><br><br><u>ACCGCGCCGACTCACACCGGC</u>                                                                                                         | putative cobalamin<br>biosynthesis protein               |
| 799                                              | <i>sav_6407</i> | <i>cobJ</i>  | <u>GCCGCCGTGCGGAAATCAGGC</u>                                                                                                                                             | putative precorrin methylase                             |
| 800                                              | <i>sav_6794</i> | <i>cobL2</i> | <u>GCCGCCGGAACCCGGCCCCGGC</u>                                                                                                                                            | putative precorrin-6Y<br>C5,15-methyltransferase         |
| 801                                              | <i>sav_6026</i> | <i>cobS</i>  | <u>GCCGCGCTACCCCCGGGGCCGCC</u>                                                                                                                                           | putative cobalamin<br>(5'-phosphate) synthase            |
| 802                                              | <i>sav_6795</i> | <i>cobT2</i> | <u>ACCGCACTCCGGTCACCCGGC</u><br><u>ACCGACCGC</u>                                                                                                                         | putative<br>nicotinate-nucleotide-dimethyl               |

|     |                 |              |                                                                                                                                                                                   |                                                                                                        |
|-----|-----------------|--------------|-----------------------------------------------------------------------------------------------------------------------------------------------------------------------------------|--------------------------------------------------------------------------------------------------------|
| 803 | <i>sav_6032</i> | <i>cobU</i>  | <u>GCCGAAGCCGGATCTTGATCGGC</u><br><u>GCCGATCAAGATCCGGCTTCGGC</u>                                                                                                                  | benzimidazole<br>phosphoribosyltransferase<br>putative adenosylcobinamide<br>kinase/adenosylcobinamide |
| 804 | <i>sav_2424</i> | <i>cobW</i>  | <u>GCCGAGCGGCTCTGATCGGC</u><br><u>GCCGCCACCGCTCGCC</u><br><u>GCCGATCAGAGCCGCTCGGC</u><br><u>GCCGAATGGGGCCGGC</u>                                                                  | phosphate guanylyltransferase<br>putative cobalamin synthesis<br>protein                               |
| 805 | <i>sav_109</i>  | <i>cyp1</i>  | <u>ACCGCGACCCGCC</u><br><u>GCCGACCGGCCAGCCGGC</u><br><u>GCCGCCTGCAACAACGGCCCCGCC</u><br><u>ACCGCTGCCCGGC</u><br><u>GCCGAGACGGACCTCGACGGCCGGC</u><br><u>ACCGCTCGCTGGTCGCCCTGCC</u> | cytochrome P450 hydroxylase                                                                            |
| 806 | <i>sav_575</i>  | <i>cyp2</i>  | <u>GCCGCGGCCCGCC</u><br><u>GCCGCCGGCTGGC</u><br><u>ACCGAATGGCGCCCTGCCCGCC</u><br><u>GCCGCCAGCCGGC</u><br><u>GCCGAACGCTCTCCCGGC</u>                                                | putative cytochrome<br>P450/NADPH-ferrihemoprotein<br>reductase                                        |
| 807 | <i>sav_1171</i> | <i>cyp5</i>  | <u>GCCGCGGGTCCCTTCGGC</u><br><u>GCCGATACCGGGATCGCC</u><br><u>GCCGCGATGCCCGAGCAGCC</u><br><u>ACCGCCCGCACCCGACGGCCGGC</u><br><u>ACCGCGGATCCCGCC</u>                                 | putative cytochrome P450                                                                               |
| 808 | <i>sav_1611</i> | <i>cyp7</i>  | <u>GCCGCACTCGCC</u>                                                                                                                                                               | putative cytochrome P450                                                                               |
| 809 | <i>sav_2061</i> | <i>cyp9</i>  | <u>GCCGCGCCCTGCC</u>                                                                                                                                                              | cytochrome P450 hydroxylase                                                                            |
| 810 | <i>sav_3536</i> | <i>cyp16</i> | <u>GCCGCTCGCC</u>                                                                                                                                                                 | putative cytochrome P450                                                                               |
| 811 | <i>sav_3704</i> | <i>cyp17</i> | <u>GCCGCCCGGCCAGCC</u>                                                                                                                                                            | cytochrome P450 hydroxylase                                                                            |
| 812 | <i>sav_4539</i> | <i>cyp20</i> | <u>ACCGAGCAGACACCCCTGGTCAGGC</u>                                                                                                                                                  | putative cytochrome P450                                                                               |
| 813 | <i>sav_5111</i> | <i>cyp21</i> | <u>GCCGCGCGCCGCC</u>                                                                                                                                                              | putative cytochrome P450                                                                               |
| 814 | <i>sav_5841</i> | <i>cyp22</i> | <u>GCCGCAAGGGTCTTGACAGCC</u><br><u>GCCGCGCCCCCTTGCC</u>                                                                                                                           | cytochrome P450 hydroxylase                                                                            |
| 815 | <i>sav_6249</i> | <i>cyp23</i> | <u>GCCGACCGCC</u>                                                                                                                                                                 | cytochrome P450 hydroxylase                                                                            |
| 816 | <i>sav_6796</i> | <i>cysG</i>  | <u>ACCGCCCCGGC</u>                                                                                                                                                                | putative uroporphyrin-III<br>methyltransferase                                                         |
| 817 | <i>sav_6873</i> | <i>dfp</i>   | <u>ACCGCGCCCCCGGCACACCACAGGC</u>                                                                                                                                                  | phosphopantothienoylcysteine<br>decarboxylase                                                          |
| 818 | <i>sav_4670</i> | <i>folB</i>  | <u>ACCGCACTCGGTGGATGCCGGC</u><br><u>GCCGCGCCCCGCC</u><br><u>ACCGAGTGCGGTCCGGCGCACCAGCC</u>                                                                                        | putative dihydroneopterin<br>aldolase                                                                  |
| 819 | <i>sav_5452</i> | <i>folC</i>  | <u>GCCGAGGTGGTGGGGCCCCGGC</u><br><u>ACCGATCGCGACCCCGATCTCGCC</u><br><u>GCCGCACGGCTGCCCGAGACTGCC</u>                                                                               | putative folylpolyglutamate<br>synthase                                                                |

|     |                 |              |                                                                                                                                                                                                |                                                                                              |
|-----|-----------------|--------------|------------------------------------------------------------------------------------------------------------------------------------------------------------------------------------------------|----------------------------------------------------------------------------------------------|
|     |                 |              | <u>GCCGCACGCGCCGGC</u>                                                                                                                                                                         |                                                                                              |
|     |                 |              | <u>ACCGACACAGGC</u>                                                                                                                                                                            |                                                                                              |
| 820 | <i>sav_3442</i> | <i>folD1</i> | <u>GCCGCGCTGCC</u>                                                                                                                                                                             | methylenetetrahydrofolate<br>dehydrogenase and<br>methenyltetrahydrofolate<br>cyclohydrolase |
| 821 | <i>sav_543</i>  | <i>folD2</i> | <u>ACCGCTGACTGGC</u>                                                                                                                                                                           | methylenetetrahydrofolate<br>dehydrogenase and<br>methenyltetrahydrofolate<br>cyclohydrolase |
| 822 | <i>sav_4667</i> | <i>folE</i>  | <u>GCCGCCCTCATCAGGC</u><br><u>GCCGCGCCCCCAGGTTCTAGCC</u><br><u>GCCGCGCCCCCAGGC</u>                                                                                                             | putative GTP cyclohydrolase I                                                                |
| 823 | <i>sav_3123</i> | <i>folP1</i> | <u>GCCGACGCGCAGCGCTCGGC</u><br><u>GCCGACGCGCTGCGCGTCGGC</u><br><u>GCCGACCCGATCCGAAAGGCAGGC</u>                                                                                                 | putative dihydropteroate<br>synthase                                                         |
| 824 | <i>sav_4672</i> | <i>folP2</i> | <u>GCCGCCC GCCGACGGGCAGGC</u><br><u>GCCGCGAGGCGGCCGGC</u><br><u>GCCGACCACGGGAGGCCTAGGC</u><br><u>ACCGCCCTGCC</u><br><u>ACCGCCCTGCC</u><br><u>GCCGCCGGGCGGGTGGGGCTGCC</u><br><u>GCCGAATCGCC</u> | putative dihydropteroate<br>synthase                                                         |
| 825 | <i>sav_4864</i> | <i>grcC</i>  | <u>ACCGCCCGC</u>                                                                                                                                                                               | putative polyprenyl<br>diphosphate synthase                                                  |
| 826 | <i>sav_4742</i> | <i>hemB</i>  | <u>GCCGCGGGAGCACCTTTGCC</u>                                                                                                                                                                    | putative 5-aminolevulinic acid<br>dehydratase                                                |
| 827 | <i>sav_1038</i> | <i>hemC2</i> | <u>GCCGCGGAGGACGGGAGTCGCC</u><br><u>GCCGCGTCCGAAGGGTGC GGCTGCC</u><br><u>GCCGATCGGC</u><br><u>GCCGATCGGC</u>                                                                                   | putative porphobilinogen<br>deaminase                                                        |
| 828 | <i>sav_2228</i> | <i>hemE</i>  | <u>ACCGACAGCCCCGCC</u>                                                                                                                                                                         | putative uroporphyrinogen<br>decarboxylase                                                   |
| 829 | <i>sav_2407</i> | <i>hemH</i>  | <u>GCCGACAACGATCTCGTCACCCGCC</u>                                                                                                                                                               | putative ferrochelatase                                                                      |
| 830 | <i>sav_1663</i> | <i>idi</i>   | <u>GCCGCGCACCGGGAATCGCC</u>                                                                                                                                                                    | putative<br>isopentenyl-diphosphate<br>delta-isomerase                                       |
| 831 | <i>sav_3969</i> | <i>ispD</i>  | <u>GCCGCCCGCTCAGCC</u><br><u>GCCGACGCGCCCGGC</u>                                                                                                                                               | putative<br>2-C-methyl-D-erythritol<br>4-phosphate<br>cytidyltransferase                     |
| 832 | <i>sav_6010</i> | <i>lipB</i>  | <u>GCCGCGTGCCCGGATCGCC</u><br><u>GCCGATGTCCGTCAGCC</u>                                                                                                                                         | putative lipote-protein ligase                                                               |
| 833 | <i>sav_4831</i> | <i>menG</i>  | <u>ACCGACCGC</u>                                                                                                                                                                               | putative                                                                                     |

|     |                 |              |                                                                                                                                                                                            |                                                              |
|-----|-----------------|--------------|--------------------------------------------------------------------------------------------------------------------------------------------------------------------------------------------|--------------------------------------------------------------|
|     |                 |              |                                                                                                                                                                                            | ubiquinone/menaquinone methyltransferase                     |
| 834 | <i>sav_6100</i> | <i>metF</i>  | <u>ACCGCCGGGCCCCTGGC</u>                                                                                                                                                                   | putative 5, 10-methylenetetrahydrofolate reductase           |
| 835 | <i>sav_3672</i> | <i>moaA1</i> | <u>GCCGCGACCCGTGCCACCGGC</u>                                                                                                                                                               | putative molybdopterin biosynthesis protein                  |
| 836 | <i>sav_3059</i> | <i>moaE</i>  | <u>GCCGCCCGTCACCCCGCGACAGCC</u><br><u>ACCGACGTTCGGC</u>                                                                                                                                    | putative molybdoprotein biosynthesis protein                 |
| 837 | <i>sav_6041</i> | <i>nadA</i>  | <u>GCCGACGGTTGCAACCGGC</u>                                                                                                                                                                 | putative quinolinate synthetase                              |
| 838 | <i>sav_5478</i> | <i>nadD</i>  | <u>GCCGCCCGCAGGCGCCCGGC</u>                                                                                                                                                                | putative nicotinate-nucleotide                               |
|     |                 |              | <u>GCCGCCCCCGGGCCCGATACCGGC</u>                                                                                                                                                            | adenylyltransferase                                          |
| 839 | <i>sav_5948</i> | <i>nadE</i>  | <u>GCCGACAGCGCGTTCGCGCCCGCC</u><br><u>GCCGCACGGTGTTCGGC</u><br><u>GCCGCGCCGACTGTACGGACTGCC</u><br><u>GCCGCGGGGGCGCCCGCC</u><br><u>GCCGCTCGCCCGGGCACCGGC</u><br><u>GCCGCCCTCAGCCCCTCGGC</u> | putative NH(3)-dependent NAD (+) synthetase                  |
| 840 | <i>sav_7245</i> | <i>panD</i>  | <u>GCCGCGAGATCCGCC</u><br><u>GCCGCCACCCACATTCGGC</u><br><u>GCCGCGTCTGCGAATGCCTTCGGC</u><br><u>GCCGCACCACCTCTTCGGC</u><br><u>GCCGAGTTCACCCAGCCCGCC</u>                                      | putative L-aspartate 1-decarboxylase                         |
| 841 | <i>sav_3834</i> | <i>pdxH2</i> | <u>GCCGACAGGTTCGAGCAGCC</u><br><u>GCCGAGCGCGTGAACCGGC</u>                                                                                                                                  | putative pyridoxamine 5'-phosphate oxidase                   |
| 842 | <i>sav_6830</i> | <i>pdxS</i>  | <u>ACCGCTCTCTATTGGC</u>                                                                                                                                                                    | putative pyridoxine biosynthesis protein (lyase)             |
| 843 | <i>sav_6993</i> | <i>phzC</i>  | <u>ACCGCCTGTCAGCC</u><br><u>ACCGCCCTGGC</u><br><u>ACCGCCCCGCC</u><br><u>GCCGCGTGCCCCCGCGTCTTCGGC</u><br><u>GCCGCGAGCCCCAGGAGCCCGCC</u>                                                     | putative phenazine biosynthesis protein                      |
| 844 | <i>sav_6084</i> | <i>phzE</i>  | <u>ACCGCCTGTGTAGGC</u><br><u>GCCGCACCGGACGACCGGC</u><br><u>GCCGAATCGGGTAAGGTGCCTGGC</u><br><u>ACCGCTCATCCGGC</u><br><u>GCCGCCCGCC</u>                                                      | putative anthranilate/para-aminobenzoate synthases component |
| 845 | <i>sav_5157</i> | <i>pncA</i>  | <u>GCCGCCCGCGCACCGGC</u><br><u>GCCGAATGCCCCCTCCCGCC</u><br><u>GCCGCTTCCGAGGCCCCCGCCCGCC</u>                                                                                                | putative nicotinamidase                                      |
| 846 | <i>sav_404</i>  | <i>pntA</i>  | <u>GCCGCGCCCGATGAACCGCCCGCC</u><br><u>ACCGATCATTATTCGGC</u>                                                                                                                                | putative pyridine nucleotide transhydrogenase, alpha subunit |
| 847 | <i>sav_545</i>  | <i>ribA4</i> | <u>ACCGAGCGAGATGGGCCGCCCGGC</u>                                                                                                                                                            | putative GTP cyclohydrolase II                               |

|                                                          |                 |              |                                                                                                          |                                                               |
|----------------------------------------------------------|-----------------|--------------|----------------------------------------------------------------------------------------------------------|---------------------------------------------------------------|
| 848                                                      | <i>sav_6902</i> | <i>ribC</i>  | <u>GCCGCCGATCGGC</u><br><u>GCCGATCGGC</u><br><u>ACCGATCGCC</u><br><u>GCCGCGCACTGCC</u>                   | putative riboflavin synthase<br>alpha subunit                 |
| 849                                                      | <i>sav_2546</i> | <i>ribF</i>  | <u>GCCGCCCGTACAGCC</u><br><u>GCCGCGTCCGTTCGGC</u>                                                        | putative riboflavin kinase                                    |
| 850                                                      | <i>sav_5037</i> | <i>rmlA</i>  | <u>GCCGAACGCGTTCCGGCCGGC</u><br><u>GCCGCTCCGACGGCCGCC</u><br><u>ACCGCGTTCGGCCGGC</u>                     | putative nucleotide<br>phosphorylase                          |
| 851                                                      | <i>sav_6099</i> | <i>thiE</i>  | <u>GCCGCGTCCGTACACCGCC</u><br><u>ACCGACAGGCGGTCCGTAGGC</u><br><u>ACCGCGCGGGGCATGGCCGGC</u>               | putative thiamine-phosphate<br>pyrophosphorylase              |
| 852                                                      | <i>sav_3945</i> | <i>thiX2</i> | <u>GCCGAAACGCTAGTCTCCGGC</u>                                                                             | putative flavin-dependent<br>reductase                        |
| 853                                                      | <i>sav_4811</i> | <i>ubiD</i>  | <u>GCCGCCCCACGCGAACC</u><br><u>GCCGCCCGCC</u>                                                            | putative<br>3-octaprenyl-4-hydroxybenzoat<br>e carboxy-lyase  |
| 854                                                      | <i>sav_4809</i> | <i>ubiX</i>  | <u>GCCGCCCGCC</u>                                                                                        | putative decarboxylase                                        |
| 855                                                      | <i>sav_1207</i> |              | <u>ACCGCTCGGGGCGCCTGCC</u>                                                                               | putative NAD(P)H-dependent<br>FMN reductase                   |
| 856                                                      | <i>sav_2756</i> |              | <u>GCCGCGGCCGAATCCCCGGCCGCC</u><br><u>GCCGCGGTCGACGGCGACGGCCGGC</u><br><u>GCCGATGACGGCGTGGGTTCCGGC</u>   | putative<br>pyridoxal-phosphate-dependent<br>aminotransferase |
| 857                                                      | <i>sav_3828</i> |              | <u>GCCGCGCCGTCGCTCCGCC</u><br><u>ACCGACTCCCGCC</u><br><u>GCCGACGGGGACTGCCGGCCTGGC</u>                    | putative pimeloyl-CoA<br>synthetase                           |
| 858                                                      | <i>sav_3891</i> |              | <u>ACCGCCGCCGCC</u><br><u>ACCGCTGTGCCGTTCCCCGCCCTGCC</u><br><u>ACCGCCCCGCCGCC</u><br><u>ACCGCCGCCGCC</u> | putative quinone<br>oxidoreductase                            |
| <b>Metabolism of phosphates (3)</b>                      |                 |              |                                                                                                          |                                                               |
| 859                                                      | <i>sav_5583</i> | <i>phoH</i>  | <u>GCCGACACCGGC</u><br><u>ACCGCAGGCCTCAAGAGCCGGC</u>                                                     | putative phosphate<br>starvation-induced protein              |
| 860                                                      | <i>sav_5267</i> | <i>ppe2</i>  | <u>GCCGATTCGCAAGAATCCTGCC</u>                                                                            | putative phosphoesterase                                      |
| 861                                                      | <i>sav_2747</i> |              | <u>GCCGCGTCGCGTGGGCACTGCCGGC</u>                                                                         | putative phosphodiesterase                                    |
| <b>Protein synthesis, folding and modification (185)</b> |                 |              |                                                                                                          |                                                               |
| 862                                                      | <i>sav_6576</i> | <i>aprA</i>  | <u>GCCGCGATAACCGCC</u><br><u>ACCGCACTGCCCGCCAGGC</u><br><u>GCCGAGAAGTCTTGGC</u>                          | putative alkaline serine<br>protease (secreted peptidase A)   |
| 863                                                      | <i>sav_4748</i> | <i>argS2</i> | <u>ACCGCGTGGGATACTGGC</u>                                                                                | putative arginyl-tRNA<br>synthetase                           |
| 864                                                      | <i>sav_4395</i> | <i>aspS</i>  | <u>ACCGAAGCGGACAGGC</u>                                                                                  | putative aspartyl-tRNA<br>synthetase                          |
| 865                                                      | <i>sav_4514</i> | <i>clpB1</i> | <u>GCCGAACCTAGCC</u>                                                                                     | putative ATP-dependent Clp                                    |



|     |                 |               |                                                                                                                                                                |                                                                           |
|-----|-----------------|---------------|----------------------------------------------------------------------------------------------------------------------------------------------------------------|---------------------------------------------------------------------------|
| 866 | <i>sav_2600</i> | <i>clpC1</i>  | <u>GCCGCACCCCGTCCCGCCTCCGCC</u>                                                                                                                                | protease<br>putative ATP-dependent Clp                                    |
| 867 | <i>sav_4697</i> | <i>clpC2</i>  | <u>GCCGCACCCGTCCTTGGC</u>                                                                                                                                      | protease<br>putative ATP-dependent Clp                                    |
| 868 | <i>sav_5447</i> | <i>clpP1</i>  | <u>ACCGAGGCCCGGC</u>                                                                                                                                           | protease<br>putative ATP-dependent Clp                                    |
| 869 | <i>sav_7101</i> | <i>clpP3</i>  | <u>GCCGCCGCCCGGC</u>                                                                                                                                           | protease proteolytic subunit 1<br>putative ATP-dependent Clp              |
| 870 | <i>sav_1146</i> | <i>clpP4</i>  | <u>ACCGATCCTCGCC</u><br><u>GCCGCCGGATCCGCTTTCTCTGCC</u>                                                                                                        | protease proteolytic subunit 2<br>putative ATP-dependent Clp              |
| 871 | <i>sav_4637</i> | <i>clpX1</i>  | <u>GCCGCTCCITGGC</u><br><u>GCCGCTGGACCTAGGC</u>                                                                                                                | protease proteolytic subunit 1<br>putative ClpX protein                   |
| 872 | <i>sav_5449</i> | <i>clpX2</i>  | <u>ACCGCAGGTCGACACTTGCC</u>                                                                                                                                    | putative ATP-dependent Clp<br>Protease ATP binding subunit                |
| 873 | <i>sav_3967</i> | <i>cysS</i>   | <u>GCCGCCTGGGGGGCGGCCGGC</u><br><u>GCCGCCCCAGGCGGCAGCC</u>                                                                                                     | putative cysteinyl-tRNA<br>synthetase                                     |
| 874 | <i>sav_7237</i> | <i>dnaK2</i>  | <u>ACCGCTCGCCTGTAGGC</u>                                                                                                                                       | putative heat shock protein<br>Hsp70                                      |
| 875 | <i>sav_1111</i> | <i>dppA1</i>  | <u>ACCGCACGCCGGGCGCCCGGC</u>                                                                                                                                   | putative D-aminopeptidase<br>(family M55 peptidases)                      |
| 876 | <i>sav_1900</i> | <i>dppA2</i>  | <u>GCCGCCTCCACACCCGGC</u>                                                                                                                                      | putative D-aminopeptidase                                                 |
| 877 | <i>sav_6658</i> | <i>eif2</i>   | <u>GCCGCGACAGAGGTCGCCGGC</u><br><u>GCCGACGTTTCGCC</u>                                                                                                          | putative initiation factor eIF-28<br>alpha subunit                        |
| 878 | <i>sav_2086</i> | <i>engC</i>   | <u>GCCGCTGGTGACTTGGC</u><br><u>GCCGCGGGCAGGC</u><br><u>ACCGCGCTCACTGGC</u>                                                                                     | putative ribosome-associated<br>GTPase                                    |
| 879 | <i>sav_2624</i> | <i>frr</i>    | <u>ACCGACAAGGACCGCTGCC</u>                                                                                                                                     | ribosome recycling factor                                                 |
| 880 | <i>sav_6825</i> | <i>fusA2</i>  | <u>ACCGCGGGCGTCATCGGAGCCGCC</u>                                                                                                                                | translation elongation factor G                                           |
| 881 | <i>sav_1799</i> | <i>fusA3</i>  | <u>ACCGCGCGCCGCC</u><br><u>GCCGCCGTCGGC</u><br><u>GCCGAGCAGGCCCGTGTGCC</u><br><u>GCCGCGACGTGTTGTCCGGC</u><br><u>GCCGCGCAGCCGGC</u><br><u>GCCGACGGGCGGCCGGC</u> | translation elongation factor G                                           |
| 882 | <i>sav_2746</i> | <i>gatC</i>   | <u>GCCGCCCGTCCGCC</u><br><u>ACCGATCCGGC</u>                                                                                                                    | putative<br>aspartyl/glutamyl-tRNA(Asn/Gln)<br>amidotransferase subunit C |
| 883 | <i>sav_3931</i> | <i>groEL2</i> | <u>GCCGCTTGCACTCGGC</u><br><u>GCCGAGTGCAAGCGGCTCCAGGC</u><br><u>ACCGCGCTGGC</u>                                                                                | putative class I heat-shock<br>protein                                    |
| 884 | <i>sav_4991</i> | <i>groES1</i> | <u>GCCGAGACCACGTCGTACGCCGCC</u><br><u>GCCGCCGCAATTGGC</u><br><u>GCCGACTTTTCCGACGACCGGC</u>                                                                     | putative GroES                                                            |

|     |                 |              |                                  |                                 |
|-----|-----------------|--------------|----------------------------------|---------------------------------|
|     |                 |              | <u>GCCGCACCCACCCGACGACCGGC</u>   |                                 |
|     |                 |              | <u>GCCGATCCGTCCGGTCTCCGGC</u>    |                                 |
| 885 | <i>sav_7373</i> | <i>hypA</i>  | <u>GCCGCGCTCGTCAGGCTGGC</u>      | putative [NiFe] hydrogenase     |
|     |                 |              | <u>GCCGCGGGGTACGCCGTTCCGCC</u>   | expression/formation protein    |
| 886 | <i>sav_6130</i> | <i>ileS</i>  | <u>GCCGAGGCCAGCAGCC</u>          | putative isoleucyl-tRNA         |
|     |                 |              | <u>GCCGCGTCCGCC</u>              | synthetase                      |
| 887 | <i>sav_4949</i> | <i>infA1</i> | <u>ACCGAGAGCGCCCCTAGGC</u>       | putative translation initiation |
|     |                 |              |                                  | factor IF-1                     |
| 888 | <i>sav_504</i>  | <i>infA2</i> | <u>ACCGCTCCGGGTTCGCC</u>         | putative translation initiation |
|     |                 |              | <u>ACCGCGACCAGCC</u>             | factor IF-1                     |
| 889 | <i>sav_6737</i> | <i>infC</i>  | <u>ACCGCCTGACCGGGTGACCCGCC</u>   | putative translation initiation |
|     |                 |              |                                  | factor IF-3                     |
| 890 | <i>sav_5488</i> | <i>leuS</i>  | <u>GCCGCGCTGATCAGCC</u>          | putative leucyl-tRNA            |
|     |                 |              |                                  | synthetase                      |
| 891 | <i>sav_4749</i> | <i>lysS1</i> | <u>ACCGCGTGGGATACTGGC</u>        | putative lysyl-tRNA synthetase  |
| 892 | <i>sav_7296</i> | <i>lysS2</i> | <u>GCCGCTTCCGATAGCCTCACAGCC</u>  | putative lysyl-tRNA synthetase  |
|     |                 |              | <u>GCCGCGACCCCGCC</u>            |                                 |
| 893 | <i>sav_4948</i> | <i>map3</i>  | <u>GCCGCGGCCGTACTGTTGTGTAGGC</u> | putative: methionyl             |
|     |                 |              | <u>GCCGCGCACCTCGCCGCCGGC</u>     | aminopeptidase, secreted        |
| 894 | <i>sav_4403</i> | <i>metS</i>  | <u>GCCGAAACGCCGCC</u>            | putative methionyl-tRNA         |
|     |                 |              | <u>GCCGACATGGGTACGCCGCC</u>      | synthetase                      |
| 895 | <i>sav_6114</i> | <i>mraW</i>  | <u>GCCGCGCACGCGGGGAGATTCCGGC</u> | S-adenosylmethionine-depende    |
|     |                 |              | <u>ACCGCCGGGTCCCGCC</u>          | nt methyltransferase            |
| 896 | <i>sav_2513</i> | <i>osaC</i>  | <u>GCCGCGTCTAGTACTCGGC</u>       | putative osmotic regulatory     |
|     |                 |              | <u>GCCGAGTACTAGGACGCGGCAGGC</u>  | protein (prpM2,                 |
|     |                 |              | <u>GCCGCGCGTCTGCC</u>            | magnesium/manganese-depend      |
|     |                 |              | <u>ACCGCCCAGGCCGACGGACCGGC</u>   | ent protein phosphatase)        |
| 897 | <i>sav_6025</i> | <i>pepA</i>  | <u>GCCGCGCCACCCGCC</u>           | putative leucyl aminopeptidase  |
|     |                 |              | <u>ACCGCCGCTCGGC</u>             | (cytosol aminopeptidase)        |
|     |                 |              | <u>GCCGAACGGATGGGGTCGACCGGC</u>  |                                 |
| 898 | <i>sav_3115</i> | <i>pepD1</i> | <u>GCCGAAGTGGTGGAGCCGCC</u>      | putative serine protease        |
|     |                 |              | <u>GCCGACCCGTTTCGGGGCCCGCC</u>   |                                 |
|     |                 |              | <u>GCCGATGCCGGCGCCGCC</u>        |                                 |
|     |                 |              | <u>GCCGAGTCGGC</u>               |                                 |
|     |                 |              | <u>ACCGCGTCCGGCTCCGGC</u>        |                                 |
|     |                 |              | <u>ACCGCCCCACCGGCGCCGCC</u>      |                                 |
|     |                 |              | <u>GCCGACTCGGC</u>               |                                 |
|     |                 |              | <u>GCCGACTGAGCTCGAAGTCGCC</u>    |                                 |
| 899 | <i>sav_4223</i> | <i>pepD3</i> | <u>GCCGCGACCCACAGCC</u>          | putative serine protease,       |
|     |                 |              | <u>ACCGAGAACAACAGCC</u>          | secreted                        |
| 900 | <i>sav_3769</i> | <i>pepN1</i> | <u>ACCGCACCGAAGTCGGC</u>         | putative aminopeptidase N       |
| 901 | <i>sav_5395</i> | <i>pepN2</i> | <u>ACCGATCCTGCC</u>              | putative aminopeptidase N       |
| 902 | <i>sav_6212</i> | <i>pepN3</i> | <u>GCCGCCCTGTGCCCTGTTCGGC</u>    | putative aminopeptidase N       |
| 903 | <i>sav_7064</i> | <i>phoD2</i> | <u>GCCGACGCACCCGCC</u>           | putative alkaline phosphatase,  |

|     |                 |              |                                 |                                 |
|-----|-----------------|--------------|---------------------------------|---------------------------------|
|     |                 |              | <u>GCCGACAAGCGCTTCGCGGCCGGC</u> | secreted                        |
|     |                 |              | <u>GCCGCGAGGCGCTGGTCGGC</u>     |                                 |
|     |                 |              | <u>GCCGCGAAGCGCTTGTCGGC</u>     |                                 |
|     |                 |              | <u>ACCGACCCCGGC</u>             |                                 |
| 904 | <i>sav_875</i>  | <i>pip</i>   | <u>GCCGATGCAGGCAGGC</u>         | putative proline iminopeptidase |
|     |                 |              | <u>GCCGAATCGAGCGAATCGGC</u>     |                                 |
|     |                 |              | <u>GCCGCTCGGATCGGC</u>          |                                 |
|     |                 |              | <u>GCCGCCGTCCAGCC</u>           |                                 |
|     |                 |              | <u>GCCGATTCGCTCGATTCGGC</u>     |                                 |
| 905 | <i>sav_639</i>  | <i>pkn1</i>  | <u>GCCGCCCGCC</u>               | putative serine/threonine       |
|     |                 |              | <u>GCCGCCGCCCGCATGCCGGC</u>     | protein kinase                  |
| 906 | <i>sav_975</i>  | <i>pkn2</i>  | <u>GCCGCGCAGGACCGGC</u>         | putative serine/threonine       |
|     |                 |              | <u>ACCGAACTGCC</u>              | protein kinase                  |
| 907 | <i>sav_2262</i> | <i>pkn5</i>  | <u>ACCGCCCCGCAATCGCCACAGCC</u>  | putative serine/threonine       |
|     |                 |              |                                 | protein kinase                  |
| 908 | <i>sav_3540</i> | <i>pkn6</i>  | <u>GCCGCACCGTCGCCGGC</u>        | putative serine/threonine       |
|     |                 |              | <u>GCCGCCCTGCC</u>              | protein kinase                  |
| 909 | <i>sav_3816</i> | <i>pkn7</i>  | <u>ACCGCTCCGCGGGCCGCC</u>       | putative serine/threonine       |
|     |                 |              | <u>ACCGCACCGCC</u>              | protein kinase                  |
| 910 | <i>sav_4326</i> | <i>pkn10</i> | <u>ACCGCCCCGC</u>               | putative serine/threonine       |
|     |                 |              | <u>GCCGCACACGGCATCCGGC</u>      | protein kinase                  |
|     |                 |              | <u>GCCGAGGGCCGAGGTACGGCCGCC</u> |                                 |
|     |                 |              | <u>ACCGACTGCC</u>               |                                 |
|     |                 |              | <u>GCCGACGCGCAAAAGGTGTCCGGC</u> |                                 |
| 911 | <i>sav_4371</i> | <i>pkn12</i> | <u>ACCGCCGCCAGTCGCC</u>         | putative serine/threonine       |
|     |                 |              | <u>ACCGCCCCTACAGCC</u>          | protein kinase                  |
| 912 | <i>sav_4372</i> | <i>pkn13</i> | <u>ACCGCCCCTACAGCC</u>          | putative serine/threonine       |
|     |                 |              | <u>ACCGCCGCCAGTCGCC</u>         | protein kinase                  |
| 913 | <i>sav_4554</i> | <i>pkn14</i> | <u>ACCGCTCCGCCACCGCC</u>        | putative serine/threonine       |
|     |                 |              | <u>GCCGCGCCGCC</u>              | protein kinase                  |
| 914 | <i>sav_4619</i> | <i>pkn15</i> | <u>GCCGACGCGCCCCGGC</u>         | putative serine/threonine       |
|     |                 |              |                                 | protein kinase                  |
| 915 | <i>sav_4717</i> | <i>pkn16</i> | <u>GCCGAGGCTAGCAAGCCGCC</u>     | putative serine/threonine       |
|     |                 |              |                                 | protein kinase                  |
| 916 | <i>sav_5005</i> | <i>pkn18</i> | <u>GCCGCTACACGGAGGGACCGCC</u>   | putative serine/threonine       |
|     |                 |              | <u>ACCGCCCCTGCC</u>             | protein kinase                  |
| 917 | <i>sav_5006</i> | <i>pkn19</i> | <u>ACCGAGGTGACGTTCCGCC</u>      | putative serine/threonine       |
|     |                 |              |                                 | protein kinase                  |
| 918 | <i>sav_5007</i> | <i>pkn20</i> | <u>GCCGATCAGCCGATCAGCC</u>      | putative serine/threonine       |
|     |                 |              | <u>GCCGAATTCAGCC</u>            | protein kinase                  |
| 919 | <i>sav_5008</i> | <i>pkn21</i> | <u>GCCGCCGGACATACGGGCTCGGC</u>  | putative serine/threonine       |
|     |                 |              | <u>GCCGAGCCCCTATGTCCGGC</u>     | protein kinase                  |
| 920 | <i>sav_5100</i> | <i>pkn23</i> | <u>ACCGCACACGAGCACGTCCGGC</u>   | putative serine/threonine       |
|     |                 |              | <u>GCCGACGACAGCC</u>            | protein kinase                  |

|     |                 |               |                                                                                                                           |                                                                   |
|-----|-----------------|---------------|---------------------------------------------------------------------------------------------------------------------------|-------------------------------------------------------------------|
| 921 | <i>sav_6799</i> | <i>pkn30</i>  | <u>GCCGCAGAACCTGGC</u><br><u>ACCGCGTCTCCACCCGGC</u>                                                                       | putative serine/threonine<br>protein kinase                       |
| 922 | <i>sav_7509</i> | <i>pkn32</i>  | <u>GCCGATGTGTTCGCC</u>                                                                                                    | putative serine/threonine<br>protein kinase                       |
| 923 | <i>sav_6842</i> | <i>ppiB</i>   | <u>GCCGACCGCC</u>                                                                                                         | putative peptidyl-prolyl<br>cis-trans isomerase, secreted         |
| 924 | <i>sav_2812</i> | <i>prcB2</i>  | <u>ACCGCCACCGCCACCGCCGCC</u><br><u>ACCGCCACCGGC</u>                                                                       | putative 20S proteasome<br>beta-subunit                           |
| 925 | <i>sav_5102</i> | <i>prfB</i>   | <u>GCCGACGCACCGCC</u>                                                                                                     | putative peptide chain release<br>factor 2                        |
| 926 | <i>sav_2558</i> | <i>proS1</i>  | <u>GCCGCCGTTCGCC</u>                                                                                                      | putative prolyl-tRNA<br>synthetase                                |
| 927 | <i>sav_2646</i> | <i>proS2</i>  | <u>GCCGAGAGTTGCC</u>                                                                                                      | putative prolyl-tRNA<br>synthetase (eukaryote type)               |
| 928 | <i>sav_4263</i> | <i>prpA2</i>  | <u>ACCGCGGGCCGCTGCGACCAGGC</u><br><u>ACCGCGGCTTTCGCC</u><br><u>ACCGCATCGGACTGCC</u>                                       | putative serine/threonine<br>protein phosphatase                  |
| 929 | <i>sav_321</i>  | <i>prpB1</i>  | <u>GCCGCGGTTACCAGCC</u><br><u>GCCGAGCCCGGTACCGACAGGC</u><br><u>ACCGCCCGCCGTCCGGC</u>                                      | putative<br>magnesium/magnanese-depend<br>ent protein phosphatase |
| 930 | <i>sav_956</i>  | <i>prpB2</i>  | <u>GCCGATCACGACTGGC</u>                                                                                                   | putative<br>magnesium/magnanese-depend<br>ent protein phosphatase |
| 931 | <i>sav_1334</i> | <i>prpB6</i>  | <u>ACCGCCTCCTCGGCCGCC</u><br><u>GCCGATGTTCGGGCACGTACCGCC</u><br><u>ACCGCCTCGGC</u>                                        | putative<br>magnesium/magnanese-depend<br>ent protein phosphatase |
| 932 | <i>sav_4229</i> | <i>prpB7</i>  | <u>GCCGCCTCCGCC</u>                                                                                                       | putative<br>magnesium/magnanese-depend<br>ent protein phosphatase |
| 933 | <i>sav_4415</i> | <i>prpB9</i>  | <u>GCCGCATCCCGACTTGCCAGCC</u>                                                                                             | putative<br>magnesium/magnanese-depend<br>ent protein phosphatase |
| 934 | <i>sav_6744</i> | <i>prpB12</i> | <u>GCCGACGCCCAGCAGTTCCCCGGC</u><br><u>GCCGCATGGGCGCGCCGGC</u><br><u>GCCGATGGCCCCCATCAGGC</u>                              | putative<br>magnesium/magnanese-depend<br>ent protein phosphatase |
| 935 | <i>sav_698</i>  | <i>prpC1</i>  | <u>GCCGCGGTTTCGCC</u><br><u>ACCGCCCAGCGCCCTGGC</u>                                                                        | putative<br>magnesium/magnanese-depend<br>ent protein phosphatase |
| 936 | <i>sav_924</i>  | <i>prpC4</i>  | <u>GCCGCGCCTGGC</u><br><u>GCCGAAAGGACCTTCGCCCGGC</u><br><u>ACCGACTCCGGC</u><br><u>ACCGAAGAGTCGGC</u><br><u>GCCGCCCGCC</u> | putative<br>magnesium/magnanese-depend<br>ent protein phosphatase |

|     |                 |              |                                                                                                                                                                                 |                                                                   |
|-----|-----------------|--------------|---------------------------------------------------------------------------------------------------------------------------------------------------------------------------------|-------------------------------------------------------------------|
| 937 | <i>sav_1235</i> | <i>prpC5</i> | <u>GCCGAGGTGTGCCGCC</u>                                                                                                                                                         | putative<br>magnesium/magnanese-depend<br>ent protein phosphatase |
| 938 | <i>sav_4151</i> | <i>prpC6</i> | <u>GCCGCCGAAGTCGGTTCGGC</u><br><u>GCCGCCCGCC</u><br><u>GCCGAACCGACTTCGGC</u>                                                                                                    | putative<br>magnesium/magnanese-depend<br>ent protein phosphatase |
| 939 | <i>sav_7504</i> | <i>prpC7</i> | <u>ACCGAGCCTTCCAGCC</u><br><u>ACCGCGGGACCGGCGGACCGGC</u>                                                                                                                        | putative<br>magnesium/magnanese-depend<br>ent protein phosphatase |
| 940 | <i>sav_350</i>  | <i>prpD</i>  | <u>GCCGCATACAGGC</u><br><u>GCCGACCGGCGGGCCGGGCCCGGC</u><br><u>GCCGCCTGCC</u><br><u>GCCGCCAGCCACCGCCGCCTGGC</u><br><u>GCCGAACGAAGTAGCCGACCGGC</u><br><u>GCCGATCTGCGCCAGCCGGC</u> | putative<br>magnesium/magnanese-depend<br>ent protein phosphatase |
| 941 | <i>sav_3223</i> | <i>prpE2</i> | <u>GCCGATCCGGTGTAGCC</u>                                                                                                                                                        | putative<br>magnesium/magnanese-depend<br>ent protein phosphatase |
| 942 | <i>sav_4394</i> | <i>prpE3</i> | <u>ACCGAAGCGGACAGGC</u>                                                                                                                                                         | putative<br>magnesium/magnanese-depend<br>ent protein phosphatase |
| 943 | <i>sav_5727</i> | <i>prpH</i>  | <u>GCCGCCGCAGGC</u><br><u>GCCGCGCAACCGGC</u><br><u>GCCGCTTGTTAGCC</u>                                                                                                           | putative<br>magnesium/magnanese-depend<br>ent protein phosphatase |
| 944 | <i>sav_4108</i> | <i>prpI3</i> | <u>GCCGACGTCTGACGGATGTCGGC</u><br><u>GCCGACATCCGTCAGACGTCGGC</u>                                                                                                                | putative<br>magnesium/magnanese-depend<br>ent protein phosphatase |
| 945 | <i>sav_587</i>  | <i>prpJ1</i> | <u>GCCGACCGGGCGGCCGACAGCCGCC</u><br><u>GCCGCCCGGTCGGC</u>                                                                                                                       | putative<br>magnesium/magnanese-depend<br>ent protein phosphatase |
| 946 | <i>sav_767</i>  | <i>prpJ2</i> | <u>ACCGACAACCACGACCAGCC</u>                                                                                                                                                     | putative<br>magnesium/magnanese-depend<br>ent protein phosphatase |
| 947 | <i>sav_786</i>  | <i>prpJ3</i> | <u>GCCGAGTCTGCCCGCC</u><br><u>GCCGCGCTCAGATCACCCCGCC</u><br><u>ACCGACTGCACCGGC</u>                                                                                              | putative<br>magnesium/magnanese-depend<br>ent protein phosphatase |
| 948 | <i>sav_1054</i> | <i>prpJ4</i> | <u>GCCGCACGGTTCGCGGATCGCC</u><br><u>GCCGCCAACCCCGGC</u><br><u>GCCGCTCCTTCCGGC</u>                                                                                               | putative<br>magnesium/magnanese-depend<br>ent protein phosphatase |
| 949 | <i>sav_1391</i> | <i>prpJ5</i> | <u>GCCGATCCGGCACGTCGGC</u><br><u>ACCGCGCCCGGGGCTGCCGGC</u><br><u>GCCGACGTGCCGGATCGGC</u>                                                                                        | putative<br>magnesium/magnanese-depend<br>ent protein phosphatase |
| 950 | <i>sav_7172</i> | <i>prpJ7</i> | <u>GCCGCCGCGGCCCTGGCACCGCC</u><br><u>GCCGAACGAAGGCACGGCAGCC</u>                                                                                                                 | putative<br>magnesium/magnanese-depend                            |

|     |                 |              |                                  |                                |
|-----|-----------------|--------------|----------------------------------|--------------------------------|
|     |                 |              | <u>GCCGCCCCCGTCGCATGCTGCC</u>    | ent protein phosphatase        |
|     |                 |              | <u>GCCGCGGCGGCGGGCTCCGGC</u>     |                                |
|     |                 |              | <u>GCCGCCTGCCGCCGGCCCGGGC</u>    |                                |
|     |                 |              | <u>GCCGCTCGACGAGGTGCCGGC</u>     |                                |
| 951 | <i>sav_7498</i> | <i>prpJ8</i> | <u>GCCGCCCGCC</u>                | putative                       |
|     |                 |              | <u>ACCGAGAACC</u> <u>CCGGC</u>   | magnesium/magnanese-depend     |
|     |                 |              | <u>GCCGCGGGAATCGGCACCGGC</u>     | ent protein phosphatase        |
| 952 | <i>sav_5565</i> | <i>prpK</i>  | <u>ACCGAAGTGGG</u> <u>CCGCC</u>  | putative                       |
|     |                 |              |                                  | magnesium/magnanese-depend     |
|     |                 |              |                                  | ent protein phosphatase        |
| 953 | <i>sav_1908</i> | <i>prpL2</i> | <u>ACCGACCGGC</u>                | putative                       |
|     |                 |              |                                  | magnesium/magnanese-depend     |
|     |                 |              |                                  | ent protein phosphatase        |
| 954 | <i>sav_7478</i> | <i>prpL4</i> | <u>GCCGCGGTGGCGATCCGGC</u>       | putative                       |
|     |                 |              | <u>GCCGCGGGCCGGC</u>             | magnesium/magnanese-depend     |
|     |                 |              |                                  | ent protein phosphatase        |
| 955 | <i>sav_437</i>  | <i>prpM1</i> | <u>GCCGCAGATCCGGAGCCTGGC</u>     | putative                       |
|     |                 |              | <u>ACCGCCCAGGC</u>               | magnesium/magnanese-depend     |
|     |                 |              | <u>GCCGCCCGGC</u>                | ent protein phosphatase        |
|     |                 |              | <u>GCCGCACCATAGTCACCATCGCC</u>   |                                |
| 956 | <i>sav_3185</i> | <i>prpM3</i> | <u>GCCGCCCTCGGCATCCGCC</u>       | putative                       |
|     |                 |              |                                  | magnesium/magnanese-depend     |
|     |                 |              |                                  | ent protein phosphatase        |
| 957 | <i>sav_7288</i> | <i>prpM4</i> | <u>GCCGCAGTCGGC</u>              | putative                       |
|     |                 |              | <u>GCCGCGGGGCCGGCCCGCCGGC</u>    | magnesium/magnanese-depend     |
|     |                 |              | <u>GCCGCGGTTCGCGGTGGAGGCCGCC</u> | ent protein phosphatase        |
|     |                 |              | <u>ACCGCCGGGCGGGCCGGCCCGGC</u>   |                                |
| 958 | <i>sav_7330</i> | <i>prpM5</i> | <u>ACCGCACCCGAAGAACGCCCGGC</u>   | putative                       |
|     |                 |              |                                  | magnesium/magnanese-depend     |
|     |                 |              |                                  | ent protein phosphatase        |
| 959 | <i>sav_994</i>  | <i>ptpA1</i> | <u>GCCGACCCGGC</u>               | putative conventional protein  |
|     |                 |              |                                  | tyrosine phosphatase           |
| 960 | <i>sav_2948</i> | <i>ptpA3</i> | <u>GCCGAGCCGGGTGCCGACCTGCC</u>   | putative conventional protein  |
|     |                 |              | <u>GCCGCTCGCC</u>                | tyrosine phosphatase           |
|     |                 |              | <u>GCCGACCGGC</u>                |                                |
|     |                 |              | <u>GCCGAGATCGTTGGCAGGTCGGC</u>   |                                |
| 961 | <i>sav_3669</i> | <i>rimJ</i>  | <u>GCCGACCTACCGCC</u>            | putative                       |
|     |                 |              |                                  | ribosomal-protein-alanine      |
|     |                 |              |                                  | N-acetyltransferase            |
| 962 | <i>sav_4911</i> | <i>rplA</i>  | <u>GCCGAGCAGGCCCTGCC</u>         | putative ribosomal protein L1  |
| 963 | <i>sav_4941</i> | <i>rplF</i>  | <u>ACCGAGTCCTGCC</u>             | putative ribosomal protein L6  |
|     |                 |              | <u>ACCGAGGTCCGCC</u>             |                                |
| 964 | <i>sav_4912</i> | <i>rplJ</i>  | <u>GCCGACCGAGCGGATTTGCC</u>      | putative ribosomal protein L10 |
|     |                 |              | <u>ACCGCTGGTCGTTGCC</u>          |                                |

|     |                 |              |                                  |                                |
|-----|-----------------|--------------|----------------------------------|--------------------------------|
|     |                 |              | <u>GCCGCGCGCTGTCCCCGCGCCGGC</u>  |                                |
| 965 | <i>sav_4910</i> | <i>rplK</i>  | <u>ACCGAGCAGGTCAGACCGGC</u>      | putative ribosomal protein L11 |
| 966 | <i>sav_4913</i> | <i>rplL</i>  | <u>GCCGAACGTACGCCCGCC</u>        | putative ribosomal protein     |
|     |                 |              | <u>GCCGAATAGTGGAAAGGATCGCC</u>   | L7/L12                         |
| 967 | <i>sav_4957</i> | <i>rplM</i>  | <u>ACCGAGGTCCGCC</u>             | putative ribosomal protein L13 |
|     |                 |              | <u>GCCGCTGGTCAICGGC</u>          |                                |
| 968 | <i>sav_2640</i> | <i>rplS</i>  | <u>GCCGCTGCTGTACGTCTCGGC</u>     | putative ribosomal protein L19 |
| 969 | <i>sav_5467</i> | <i>rplU</i>  | <u>GCCGCCCGTAACCTTGGC</u>        | putative ribosomal protein L21 |
|     |                 |              | <u>GCCGCCCGTCCCGGC</u>           |                                |
|     |                 |              | <u>ACCGCAAGCGGCCTCTCCCTGGC</u>   |                                |
| 970 | <i>sav_3563</i> | <i>rplY</i>  | <u>ACCGAACAGTGGCGCCTCCCTCGCC</u> | putative ribosomal protein L25 |
| 971 | <i>sav_2675</i> | <i>rpmB</i>  | <u>GCCGCAAGAGCGCCGCGAGACCGCC</u> | putative ribosomal protein L28 |
|     |                 |              | <u>GCCGCTGGCAAGGGCGCGGGCCGGC</u> |                                |
|     |                 |              | <u>GCCGCCGGGGTGGTCCGGC</u>       |                                |
|     |                 |              | <u>ACCGCGGCCGGCCCGCGCCCTTGCC</u> |                                |
| 972 | <i>sav_1572</i> | <i>rpmE1</i> | <u>GCCGCCTCCGGGCTTTCCCGCC</u>    | putative ribosomal protein L31 |
| 973 | <i>sav_2913</i> | <i>rpmE2</i> | <u>GCCGACGTACCAGTCTGCC</u>       | putative ribosomal protein L31 |
| 974 | <i>sav_4900</i> | <i>rpmG</i>  | <u>ACCGCTACTGACAGTAGCC</u>       | putative ribosomal protein L33 |
|     |                 |              | <u>GCCGATCGCC</u>                |                                |
|     |                 |              | <u>ACCGACCCCAATCGGC</u>          |                                |
| 975 | <i>sav_4315</i> | <i>rpmH</i>  | <u>GCCGCCTGCC</u>                | putative ribosomal protein L34 |
| 976 | <i>sav_6233</i> | <i>rpsA</i>  | <u>ACCGCATACCCGGC</u>            | putative ribosomal protein S1  |
| 977 | <i>sav_2627</i> | <i>rpsB</i>  | <u>GCCGCTGTCCACAACCGGC</u>       | putative ribosomal protein S2  |
|     |                 |              | <u>ACCGAGAGGCGCTGACTTCGGC</u>    |                                |
| 978 | <i>sav_4940</i> | <i>rpsH</i>  | <u>ACCGCACCCGTCCCGCC</u>         | putative ribosomal protein S8  |
| 979 | <i>sav_4925</i> | <i>rpsJ</i>  | <u>GCCGATGCTGTGCGCCTCCCGCC</u>   | putative ribosomal protein S10 |
|     |                 |              | <u>GCCGACCAGGC</u>               |                                |
|     |                 |              | <u>ACCGAGCAACTCCGACAGTCTGCC</u>  |                                |
| 980 | <i>sav_4917</i> | <i>rpsL</i>  | <u>ACCGCGTGGTTCGGC</u>           | putative ribosomal protein S12 |
| 981 | <i>sav_2524</i> | <i>rpsO</i>  | <u>GCCGAGCGCCTCCGTACAGCC</u>     | putative ribosomal protein S15 |
|     |                 |              | <u>GCCGCAAGGATCGCC</u>           |                                |
|     |                 |              | <u>GCCGCGCCCAGCGGATCCCGCC</u>    |                                |
| 982 | <i>sav_2644</i> | <i>rpsP</i>  | <u>GCCGCTGGGTACGGCTGCC</u>       | putative ribosomal protein S16 |
| 983 | <i>sav_4244</i> | <i>serS1</i> | <u>ACCGAGAATTCTTTGCCCGGC</u>     | putative seryl-tRNA synthetase |
| 984 | <i>sav_1000</i> | <i>sprC</i>  | <u>GCCGACAGTCCGGGCCCTGCCGGC</u>  | putative streptogrisin C       |
|     |                 |              | <u>GCCGATACGAGGAACAAGCAGCC</u>   | (secreted serine protease)     |
|     |                 |              | <u>GCCGACACAAGGAGGCCGCCCGGC</u>  |                                |
| 985 | <i>sav_6553</i> | <i>sprD1</i> | <u>GCCGCGCCGATTGCC</u>           | putative streptogrisin D       |
|     |                 |              | <u>GCCGATTGCCGCGCCATTGCC</u>     | (secreted serine protease)     |
| 986 | <i>sav_7497</i> | <i>sprD2</i> | <u>GCCGCCGTCCGGC</u>             | putative streptogrisin D       |
|     |                 |              |                                  | (secreted serine protease)     |
| 987 | <i>sav_7486</i> | <i>sti2</i>  | <u>GCCGAACCGTGGAGATCCGGC</u>     | putative subtilisin inhibitor, |
|     |                 |              | <u>GCCGAACCGGCACCGGACCGGC</u>    | secreted                       |
| 988 | <i>sav_3417</i> | <i>trpS1</i> | <u>GCCGAGCGCCCCGAGGC</u>         | putative tryptophanyl-tRNA     |

|      |                 |              |                                                                                                                                    |                                                                |
|------|-----------------|--------------|------------------------------------------------------------------------------------------------------------------------------------|----------------------------------------------------------------|
| 989  | <i>sav_4725</i> | <i>trpS2</i> | <u>ACCGACCTGGGTCGGC</u><br><u>GCCGCCGCCCTCGGC</u><br><u>GCCGCCGTCAGGC</u><br><u>ACCGCCACCGCCGGCCGGC</u>                            | synthetase<br>putative tryptophanyl-tRNA<br>synthetase         |
| 990  | <i>sav_4920</i> | <i>tufA1</i> | <u>ACCGACCGCCGGGGCTCACCCGGC</u><br><u>GCCGCCCGCC</u>                                                                               | putative elongation factor<br>EF-Tu                            |
| 991  | <i>sav_7028</i> | <i>tufA2</i> | <u>GCCGCGCGTACCCCTTACGTCGGC</u><br><u>GCCGCCTTTCCGGGCTGCC</u><br><u>GCCGAAGGCTGCC</u><br><u>GCCGCGATGATCGGGACGGCAGCC</u>           | putative elongation factor<br>EF-Tu                            |
| 992  | <i>sav_1037</i> | <i>zmp1</i>  | <u>GCCGCCCGGCCCGGCCCGGC</u><br><u>GCCGCCCGGCCCTCGCC</u>                                                                            | putative griselysin (secreted<br>neutral zinc metalloprotease) |
| 993  | <i>sav_1128</i> | <i>zmp2</i>  | <u>ACCGAAGTCGCAGCGCCTCCGGC</u>                                                                                                     | putative griselysin (secreted<br>neutral zinc metalloprotease) |
| 994  | <i>sav_2795</i> | <i>zmp4</i>  | <u>GCCGAACGACGTGGGGTAGCC</u>                                                                                                       | putative griselysin (secreted<br>neutral zinc metalloprotease) |
| 995  | <i>sav_5630</i> | <i>zmp5</i>  | <u>GCCGACTCCCCGCCCGCCGTCGGC</u><br><u>GCCGCCCCACGCGGCCGCC</u><br><u>GCCGACGCGCGGGCGGGGAGTCGGC</u><br><u>ACCGCCGGTAGCGCGATCCGGC</u> | putative griselysin (secreted<br>neutral zinc metalloprotease) |
| 996  | <i>sav_5669</i> | <i>zmp6</i>  | <u>GCCGATTTTCATCCGCC</u>                                                                                                           | putative griselysin (secreted<br>neutral zinc metalloprotease) |
| 997  | <i>sav_734</i>  |              | <u>ACCGATGCTTCTCCAAAAGTCC</u><br><u>GCCGACGCAGCC</u>                                                                               | putative protease, secreted                                    |
| 998  | <i>sav_897</i>  |              | <u>GCCGAGCGACCCGGC</u><br><u>GCCGCTCGGC</u>                                                                                        | putative secreted<br>alpha-amylase inhibitor                   |
| 999  | <i>sav_1106</i> |              | <u>ACCGCGCGGGGCAAGGGCAGGC</u><br><u>ACCGCGCCTGCCCTTGCC</u>                                                                         | putative subfamily M50B<br>peptidases                          |
| 1000 | <i>sav_1117</i> |              | <u>GCCGACAGGC</u>                                                                                                                  | putative metallopeptidase,<br>secreted                         |
| 1001 | <i>sav_1180</i> |              | <u>GCCGAAATGAGTGTCGCC</u>                                                                                                          | putative family M6 peptidase                                   |
| 1002 | <i>sav_1231</i> |              | <u>GCCGCCCGGTCCGGC</u>                                                                                                             | putative secreted<br>tripeptidyl-peptidase C                   |
| 1003 | <i>sav_1256</i> |              | <u>ACCGATCATTCGGTAGCC</u><br><u>ACCGAATGATCGGTCGCC</u><br><u>GCCGACCTCTTGCC</u>                                                    | putative family S33 peptidase                                  |
| 1004 | <i>sav_1415</i> |              | <u>GCCGAGGAGTCGGC</u><br><u>GCCGCCGGCTGCTCCACGCCCGCC</u><br><u>GCCGCGCGCAGCGGCGCACTGGC</u><br><u>GCCGACTCCTCGGC</u>                | putative protease                                              |
| 1005 | <i>sav_1471</i> |              | <u>GCCGCTTGCCGCACCTGTCTCAGGC</u><br><u>GCCGATCCTCCACAGGGGCCGGC</u>                                                                 | putative peptidase                                             |
| 1006 | <i>sav_1640</i> |              | <u>GCCGAATCTGCCGCCGCC</u>                                                                                                          | putative zoocin A (secreted)                                   |



|      |                 |                                                                                                                                                                                         |                                                                |
|------|-----------------|-----------------------------------------------------------------------------------------------------------------------------------------------------------------------------------------|----------------------------------------------------------------|
| 1007 | <i>sav_1674</i> | <u>GCCGCGGGCATGTCCACAGCC</u>                                                                                                                                                            | peptidase)<br>putative X-Pro<br>dipeptidyl-peptidase, secreted |
| 1008 | <i>sav_1675</i> | <u>GCCGCTCCTGTACACGATCGCC</u>                                                                                                                                                           | putative metallopeptidase,<br>secreted                         |
| 1009 | <i>sav_1809</i> | <u>GCCGCCTCGGC</u>                                                                                                                                                                      | putative dipeptidase                                           |
| 1010 | <i>sav_1906</i> | <u>ACCGCGGGTGTACGGCCCTCGCC</u>                                                                                                                                                          | putative secreted peptidase                                    |
| 1011 | <i>sav_2034</i> | <u>GCCGCGGTCCGGC</u><br><u>ACCGCCGCTCGCC</u><br><u>ACCGCGCAGTCCCGGC</u><br><u>ACCGAGGGTTTTCCCTGCC</u><br><u>GCCGCGGGACCGGC</u><br><u>GCCGAGGCCGTTTGCC</u>                               | putative trypsin-like protease,<br>secreted                    |
| 1012 | <i>sav_2157</i> | <u>GCCGCGCCGGAGCGAGACCCCGCC</u><br><u>GCCGACCGCC</u>                                                                                                                                    | putative carboxypeptidase                                      |
| 1013 | <i>sav_2161</i> | <u>GCCGACCGGCCCTTTTCGCC</u><br><u>GCCGCCCCGACGTGTGTCGGCAGCC</u><br><u>ACCGCAATCGGC</u><br><u>GCCGAGACCGAACC GGGGCTCCGCC</u><br><u>GCCGCCCTGCC</u>                                       | putative peptidase                                             |
| 1014 | <i>sav_2420</i> | <u>GCCGCGGGCGCGGCGCACTGCC</u>                                                                                                                                                           | putative zoocin A (secreted<br>peptidase)                      |
| 1015 | <i>sav_2422</i> | <u>ACCGCAGATTTCTCGCC</u>                                                                                                                                                                | putative protease                                              |
| 1016 | <i>sav_2443</i> | <u>ACCGAGCATGTGGAGGCCGTCGGC</u>                                                                                                                                                         | putative trypsin-like protease,<br>secreted                    |
| 1017 | <i>sav_2467</i> | <u>ACCGATAGCC</u><br><u>GCCGATGCCCGATGGTCCCTCGCC</u><br><u>GCCGAGACCCAAGACCTCGCC</u><br><u>GCCGATGGCTGGC</u><br><u>GCCGAAGATCCTTGCC</u>                                                 | putative 2,4-diaminobutyrate<br>4-transaminase                 |
| 1018 | <i>sav_2471</i> | <u>GCCGCGCGCCGGAGCCGCC</u><br><u>GCCGCCCGGC</u>                                                                                                                                         | putative metallopeptidase,<br>secreted                         |
| 1019 | <i>sav_2628</i> | <u>ACCGAGAGGCGCTGACTTCGGC</u><br><u>GCCGCTGTCCACAACCGGC</u>                                                                                                                             | putative peptidase, secreted                                   |
| 1020 | <i>sav_2801</i> | <u>GCCGCGGGCCATCGGGTGCCCGCC</u><br><u>GCCGATTCCGCCCGCC</u><br><u>ACCGCACGAGAGGCTGCC</u><br><u>GCCGCGGTGAATTTCTGCC</u><br><u>ACCGCCACAAGGTCGCGCAGGC</u><br><u>GCCGACACGCCACTGGGCAGCC</u> | putative secreted peptidase A                                  |
| 1021 | <i>sav_2939</i> | <u>GCCGACAGGCACGCCATTGCC</u><br><u>ACCGCGCGCTGTGGCGCTCGGC</u><br><u>GCCGCAGGATCCACATCCAGGC</u>                                                                                          | putative snapalysin (secreted<br>metalloprotease)              |
| 1022 | <i>sav_2957</i> | <u>GCCGAACCGCC</u>                                                                                                                                                                      | putative NLP/P60-family                                        |

|      |                 |                                                                                                                                                                |                                                                            |
|------|-----------------|----------------------------------------------------------------------------------------------------------------------------------------------------------------|----------------------------------------------------------------------------|
| 1023 | <i>sav_3081</i> | <u>ACCGCAGCCCGCC</u>                                                                                                                                           | secreted protein (PgpA<br>peptidase)                                       |
| 1024 | <i>sav_3266</i> | <u>GCCGCCCCGCAGTCGGCCTTCGCC</u><br><u>ACCGATCGAAAACCAGCC</u><br><u>ACCGACATAGAGCCGTTGGC</u>                                                                    | putative carboxypeptidase T<br>(secreted zinc-binding<br>carboxypeptidase) |
| 1025 | <i>sav_3371</i> | <u>GCCGCACCGTCGCC</u><br><u>GCCGCCGGGGCTGCCGGC</u>                                                                                                             | putative metal-dependent<br>amidase/aminoacylase/carboxy<br>peptidase      |
| 1026 | <i>sav_3462</i> | <u>ACCGCCGGGTACAGTCGCC</u>                                                                                                                                     | putative zoocin A (family M23<br>peptidase)                                |
| 1027 | <i>sav_3464</i> | <u>GCCGCACGACCCCCACCGGC</u><br><u>GCCGCGCGGCCTCCGCC</u><br><u>ACCGACCTCGGGGTGAATCGGC</u><br><u>GCCGCCTGAAGGGCTTCAACCGCC</u><br><u>GCCGCGCGGCCCGGCGATGTTGCC</u> | putative NLP/P60-family<br>secreted protein (PgpA<br>peptidase)            |
| 1028 | <i>sav_3467</i> | <u>GCCGCCCGGGCCAGGGCGGCAGCC</u><br><u>ACCGCCGAAAGGTCCGGC</u><br><u>ACCGCTGACCGCTCGCGTCCCGGC</u><br><u>GCCGCCCTGGC</u><br><u>GCCGCCGCCGACCTTTCGGC</u>           | putative NLP/P60-family<br>secreted protein (PgpA<br>peptidase)            |
| 1029 | <i>sav_3952</i> | <u>GCCGCGGGACCCGCCGGC</u>                                                                                                                                      | putative metallopeptidase,<br>secreted                                     |
| 1030 | <i>sav_4407</i> | <u>GCCGCCGCACAGGC</u><br><u>GCCGACTCGCC</u>                                                                                                                    | putative snapalysin (secreted<br>metalloprotease)                          |
| 1031 | <i>sav_4700</i> | <u>GCCGCCAAGATCAGGGGACTTGGC</u>                                                                                                                                | putative zoocin A                                                          |
| 1032 | <i>sav_5155</i> | <u>ACCGACTCTATTTCGCC</u><br><u>GCCGACGCGCCGGTTGGC</u>                                                                                                          | putative protease, secreted                                                |
| 1033 | <i>sav_5300</i> | <u>ACCGACATCCACCTCGGC</u>                                                                                                                                      | putative tripeptidyl<br>aminopeptidase, secreted                           |
| 1034 | <i>sav_5600</i> | <u>ACCGCCAGCAGCC</u>                                                                                                                                           | putative metalloprotease                                                   |
| 1035 | <i>sav_5709</i> | <u>GCCGAAGTAGCGGCCTGGC</u><br><u>GCCGCGCACCGGCAGAGCCCGGC</u><br><u>GCCGCTACTTCGGC</u>                                                                          | putative protease                                                          |
| 1036 | <i>sav_5721</i> | <u>GCCGAGGATCACACCGTCGGC</u><br><u>GCCGCCCTGGCGAAAGCCGCC</u><br><u>GCCGACGGTGTGATCCTCGGC</u>                                                                   | putative SAM-P45 peptidase,<br>secreted                                    |
| 1037 | <i>sav_6208</i> | <u>GCCGCCACTGGATTCCACTGTAGGC</u>                                                                                                                               | putative trypsin-like protease                                             |
| 1038 | <i>sav_6295</i> | <u>GCCGACACCCACTTGGGTGGTCGGC</u>                                                                                                                               | putative carboxypeptidase T<br>(secreted zinc-binding<br>carboxypeptidase) |
| 1039 | <i>sav_6452</i> | <u>ACCGAGTTGAACCGCC</u>                                                                                                                                        | putative tripeptidyl-peptidase<br>S, secreted                              |

|                                                                              |                 |              |                                                                                                                                                                                                               |                                                                         |
|------------------------------------------------------------------------------|-----------------|--------------|---------------------------------------------------------------------------------------------------------------------------------------------------------------------------------------------------------------|-------------------------------------------------------------------------|
| 1040                                                                         | <i>sav_6634</i> |              | <u>GCCGCCCAAGGCGGGACCCGGC</u>                                                                                                                                                                                 | putative peptidase                                                      |
| 1041                                                                         | <i>sav_6649</i> |              | <u>ACCGCCGCTTCGGCTGCAACCGCC</u><br><u>GCCGAATGCTGCC</u>                                                                                                                                                       | putative serine protease                                                |
| 1042                                                                         | <i>sav_6673</i> |              | <u>GCCGACGCCCCCGCAAACACCGCC</u><br><u>ACCGACCCGGC</u><br><u>GCCGCACCCCCACCACCCCGGC</u><br><u>GCCGACGAAGCCCCCACCCGGC</u><br><u>GCCGCCCCGCCCGGC</u><br><u>GCCGCTGCCGCTGCC</u><br><u>GCCGCCGGGCTCTTTGGGTCGCC</u> | putative peptidase                                                      |
| 1043                                                                         | <i>sav_6678</i> |              | <u>GCCGACTGTTTTTCAGGC</u><br><u>ACCGAGGGCGCCGCC</u>                                                                                                                                                           | putative proteasome component                                           |
| 1044                                                                         | <i>sav_6858</i> |              | <u>GCCGACCGGATACCGCC</u>                                                                                                                                                                                      | putative peptidase                                                      |
| 1045                                                                         | <i>sav_7099</i> |              | <u>GCCGAGTCCTGCCGCCGCC</u><br><u>GCCGCTGTGGCGGGGCTTGCC</u>                                                                                                                                                    | putative NLP/P60-family secreted protein (PgpA peptidase)               |
| 1046                                                                         | <i>sav_7250</i> |              | <u>GCCGATTGCCGCTTGTCTCGGC</u><br><u>GCCGCTCCATCCCGCC</u>                                                                                                                                                      | putative zoocin A (secreted peptidase)                                  |
| <b>DNA synthesis, repair, recombination, modification and packaging (83)</b> |                 |              |                                                                                                                                                                                                               |                                                                         |
| 1047                                                                         | <i>sav_7543</i> | <i>cas3</i>  | <u>ACCGCAGGTCGCCAGCCGCTGCC</u><br><u>ACCGACGTCGTGGGACTGGTTGGC</u>                                                                                                                                             | putative CRISPR-associated helicase Cas3 family protein (type I CRISPR) |
| 1048                                                                         | <i>sav_6985</i> | <i>dinB</i>  | <u>ACCGCCCCGGTTGGC</u>                                                                                                                                                                                        | DNA polymerase IV, DNA damage inducible protein                         |
| 1049                                                                         | <i>sav_4285</i> | <i>dinF</i>  | <u>GCCGACAGGCCTAACGTGGTCCGGC</u>                                                                                                                                                                              | DNA-damage-inducible protein F                                          |
| 1050                                                                         | <i>sav_2464</i> | <i>dinG</i>  | <u>GCCGAATCCGCCCGCCGCC</u>                                                                                                                                                                                    | putative ATP-dependent helicase                                         |
| 1051                                                                         | <i>sav_4316</i> | <i>dnaA</i>  | <u>GCCGCCTGCC</u>                                                                                                                                                                                             | putative replication initiator protein                                  |
| 1052                                                                         | <i>sav_4284</i> | <i>dnaB</i>  | <u>GCCGACAGGCCTAACGTGGTCCGGC</u><br><u>GCCGCGCGGACCTCGCC</u>                                                                                                                                                  | putative replicative DNA helicase                                       |
| 1053                                                                         | <i>sav_5676</i> | <i>dnaG</i>  | <u>GCCGCGTCGCGGAGACCCCGGC</u><br><u>GCCGCGGTCCGCC</u><br><u>GCCGCTGCGCGGTGGGCCGCC</u><br><u>GCCGCACAGCC</u>                                                                                                   | putative DNA primase                                                    |
| 1054                                                                         | <i>sav_4317</i> | <i>dnaN1</i> | <u>ACCGCACTGACAGTCGTTGCCGCC</u><br><u>GCCGCCTCCTGCTATTGCCGGC</u>                                                                                                                                              | putative DNA polymerase III beta subunit                                |
| 1055                                                                         | <i>sav_2147</i> | <i>dnaQ3</i> | <u>ACCGCGCCCGCC</u><br><u>ACCGCGTTCGCTTCGCC</u>                                                                                                                                                               | putative DNA polymerase III epsilon subunit                             |
| 1056                                                                         | <i>sav_4150</i> | <i>dnaZX</i> | <u>ACCGCCCGAACGGCTCGCC</u>                                                                                                                                                                                    | putative DNA polymerase III gamma and tau subunit                       |
| 1057                                                                         | <i>sav_2933</i> | <i>dndA</i>  | <u>ACCGAATCAGCC</u><br><u>ACCGCTAGCGCCGCC</u>                                                                                                                                                                 | putative DNA modification (L-cysteine desulfurase:                      |

|      |                 |              |                                                                                                                                                               |                                                       |
|------|-----------------|--------------|---------------------------------------------------------------------------------------------------------------------------------------------------------------|-------------------------------------------------------|
|      |                 |              |                                                                                                                                                               | pyridoxal<br>phosphate-dependent)                     |
| 1058 | <i>sav_2932</i> | <i>dndB</i>  | <u>ACCGCTAGCGCCGCC</u><br><u>ACCGAATCAGCC</u>                                                                                                                 | putative DNA modification<br>(ATPase)                 |
| 1059 | <i>sav_4321</i> | <i>gyrB</i>  | <u>GCCGCAGCCGCTCCGGCCACCCGCC</u><br><u>ACCGCACGCGGTCGGCCCCGGC</u><br><u>GCCGCCCTCAACCGGTCTCGGC</u><br><u>GCCGACAGTGATGGGGGTTTGCC</u><br><u>GCCGATCTCCCGGC</u> | putative DNA gyrase subunit B                         |
| 1060 | <i>sav_3915</i> | <i>helD1</i> | <u>GCCGACCCGCCCTCGCGGCAGCC</u><br><u>GCCGCGAGGGCGGGTCGGC</u>                                                                                                  | putative ATP-dependent DNA<br>helicase                |
| 1061 | <i>sav_1978</i> | <i>helZ3</i> | <u>GCCGATGACCGGCGACCAGGC</u><br><u>GCCGATTGTCAGACCCCGCC</u>                                                                                                   | putative SNF2/RAD54 family<br>helicase                |
| 1062 | <i>sav_5558</i> | <i>hola</i>  | <u>GCCGCGTCGCC</u><br><u>GCCGCCTCGCCCGGC</u>                                                                                                                  | putative DNA polymerase III<br>delta subunit          |
| 1063 | <i>sav_4623</i> | <i>holB</i>  | <u>GCCGACCCGGC</u><br><u>GCCGACCGCGCTCAGCC</u>                                                                                                                | putative DNA polymerase III<br>delta primer subunit   |
| 1064 | <i>sav_4128</i> | <i>hrpA</i>  | <u>GCCGCAACGGACCCCGCC</u><br><u>ACCGACCCACCCAGCCGCCCGGC</u><br><u>GCCGCCACGCACAAAAGCGTTTCGCC</u>                                                              | putative ATP-dependent<br>helicase                    |
| 1065 | <i>sav_5127</i> | <i>hup</i>   | <u>ACCGAGGACCCTGGCAGCATCGGC</u><br><u>GCCGATGCTGCC</u>                                                                                                        | putative DNA-binding protein<br>Hu 1                  |
| 1066 | <i>sav_2684</i> | <i>hupB</i>  | <u>GCCGCGACTGCC</u><br><u>GCCGCAACGAACTCGGC</u>                                                                                                               | putative histone-like<br>DNA-binding protein          |
| 1067 | <i>sav_159</i>  | <i>int1</i>  | <u>ACCGCCCCCTCACCGCC</u><br><u>ACCGCCCCCGCC</u>                                                                                                               | putative tyrosine-family<br>recombinase/integrase     |
| 1068 | <i>sav_497</i>  | <i>int3</i>  | <u>GCCGCCCGGC</u><br><u>GCCGAACGCCGCCGCGACCCAGGC</u><br><u>GCCGACGTCGACCGGC</u>                                                                               | putative recombinase/integrase                        |
| 1069 | <i>sav_4468</i> | <i>int11</i> | <u>GCCGCCTCAGGC</u>                                                                                                                                           | putative serine-family<br>recombinase/integrase       |
| 1070 | <i>sav_5548</i> | <i>int13</i> | <u>ACCGACTGAATTGGAGTCGGC</u>                                                                                                                                  | putative serine-family<br>recombinase/integrase       |
| 1071 | <i>sav_5555</i> | <i>int14</i> | <u>GCCGCTGACCTGCTGTTTTGCTGCC</u>                                                                                                                              | putative serine-family<br>recombinase/integrase       |
| 1072 | <i>sav_5815</i> | <i>int15</i> | <u>GCCGACCGCCCCAGCC</u><br><u>GCCGCCGGGCGCGGCCAGCC</u><br><u>GCCGCGCCCCGGCGGCGCGCTGGC</u><br><u>GCCGCCTCTGCGGCGCGGCCTGCC</u>                                  | putative tyrosine-family<br>recombinase/integrase     |
| 1073 | <i>sav_2500</i> | <i>lhr</i>   | <u>GCCGAGGCGGACCACCCGCCGCC</u>                                                                                                                                | ATP-dependent DNA helicase                            |
| 1074 | <i>sav_1697</i> | <i>ligC</i>  | <u>GCCGATGTTTCGCC</u>                                                                                                                                         | putative DNA ligase                                   |
| 1075 | <i>sav_2504</i> | <i>mrgA2</i> | <u>ACCGCCTCGCCCCGCCCGGC</u>                                                                                                                                   | putative starvation-induced<br>DNA protecting protein |
| 1076 | <i>sav_2664</i> | <i>mutM1</i> | <u>ACCGAGCGCCCCGCC</u>                                                                                                                                        | formamidopyrimidine-DNA                               |

|      |                 |              |                                                                                                                                                  |                                                                                  |
|------|-----------------|--------------|--------------------------------------------------------------------------------------------------------------------------------------------------|----------------------------------------------------------------------------------|
| 1077 | <i>sav_4707</i> | <i>mutY</i>  | <u>GCCGCGACGGGCCCGCACACCGGC</u><br><u>ACCGCACAGCCCCGCACCCGCC</u><br><u>ACCGCCC GCCCACCCCGGC</u>                                                  | glycosylase<br>putative A/G-specific adenine<br>glycosylase                      |
| 1078 | <i>sav_2501</i> | <i>nei1</i>  | <u>GCCGCTCGCGCCACGTCCGGC</u><br><u>GCCGCTCTCTGGC</u>                                                                                             | putative endonuclease VIII and<br>DNA N-glycosylase with an<br>AP lyase activity |
| 1079 | <i>sav_5427</i> | <i>nei2</i>  | <u>ACCGAAGAATCAGCCCCGGCCGGC</u>                                                                                                                  | putative endonuclease VIII and<br>DNA N-glycosylase with an<br>AP lyase activity |
| 1080 | <i>sav_4593</i> | <i>nth</i>   | <u>GCCGCACTGCC</u><br><u>ACCGACATCCGCC</u>                                                                                                       | putative endonuclease III                                                        |
| 1081 | <i>sav_2053</i> | <i>ogt2</i>  | <u>GCCGACCGGC</u><br><u>ACCGAGGACGCCGGTCCGGC</u><br><u>GCCGCCCTGTCTGGC</u>                                                                       | methylated-DNA-protein-cyste<br>ine S-methyltransferase                          |
| 1082 | <i>sav_2423</i> | <i>parC</i>  | <u>ACCGCAGATTTCTCGCC</u>                                                                                                                         | putative subunit of<br>topoisomerase IV                                          |
| 1083 | <i>sav_2442</i> | <i>parE</i>  | <u>ACCGAAGCCCCGGC</u><br><u>GCCGCGAGCGGGAACGTTTTCCGGC</u><br><u>GCCGCCAACC GGCAGCAATCAGCC</u>                                                    | putative subunit of<br>topoisomerase IV                                          |
| 1084 | <i>sav_1212</i> | <i>phrB</i>  | <u>GCCGCACAGGC</u><br><u>GCCGCCCTGTGCCTGTCCGC</u><br><u>GCCGCTGGATCCCGACCGGCTGCC</u><br><u>GCCGACGGATCCCGCC</u><br><u>GCCGCGCCTGTGCGGCTCTGCC</u> | putative deoxyribodipyrimidine<br>photolyase                                     |
| 1085 | <i>sav_4636</i> | <i>polA2</i> | <u>GCCGCCTGCC</u><br><u>ACCGCGGGGCAGGC</u>                                                                                                       | putative DNA polymerase I                                                        |
| 1086 | <i>sav_6875</i> | <i>priA</i>  | <u>GCCGCCGCGGCACCCGGC</u><br><u>GCCGCGTCGTCCGGC</u><br><u>ACCGCTCCGC</u>                                                                         | putative primosomal protein                                                      |
| 1087 | <i>sav_4710</i> | <i>radA</i>  | <u>GCCGACAGGTGGCCCCTTCTGCC</u><br><u>ACCGCCCGCC</u><br><u>ACCGCGACCGGC</u><br><u>GCCGCCACCCCGCGATTCGGC</u><br><u>GCCGCACATCAAGAAGCGCAGCC</u>     | putative DNA repair protein                                                      |
| 1088 | <i>sav_2492</i> | <i>recA</i>  | <u>GCCGCACACAGACCCCGGC</u><br><u>GCCGCGACCGGCGGATCAGGC</u><br><u>GCCGCCGACGCCCCACCCGTCAGGC</u>                                                   | putative recombination protein<br>RecA                                           |
| 1089 | <i>sav_2671</i> | <i>recG</i>  | <u>ACCGCCCGACCCCGCGCCGTCGCC</u>                                                                                                                  | putative ATP-dependent DNA<br>helicase                                           |
| 1090 | <i>sav_5628</i> | <i>recO</i>  | <u>GCCGATGCGCGGGCGCCGTAGGC</u>                                                                                                                   | putative DNA recombination<br>and repair protein                                 |
| 1091 | <i>sav_4851</i> | <i>recQ</i>  | <u>GCCGACGGGCCGGTCCGGC</u><br><u>GCCGACCGGC</u>                                                                                                  | putative ATP-dependent DNA<br>helicase                                           |

|      |                 |               |                                  |                                 |
|------|-----------------|---------------|----------------------------------|---------------------------------|
|      |                 |               | <u>GCCGACCCGGCCCGTCGGCTGCC</u>   |                                 |
|      |                 |               | <u>GCCGCTCAGCCGGTCGGC</u>        |                                 |
|      |                 |               | <u>GCCGCGTACCCGGC</u>            |                                 |
|      |                 |               | <u>ACCGACCGGC</u>                |                                 |
| 1092 | <i>sav_3982</i> | <i>repSA2</i> | <u>GCCGCCCCGGC</u>               | putative replication initiation |
|      |                 |               | <u>GCCGCCCCGGAGGTCTGGC</u>       | protein                         |
| 1093 | <i>sav_1310</i> | <i>rho2</i>   | <u>GCCGCGACCGGC</u>              | putative transcription          |
|      |                 |               | <u>GCCGCAACCGAGGTGTTCCGCC</u>    | termination factor              |
|      |                 |               | <u>GCCGCTCCGGC</u>               |                                 |
|      |                 |               | <u>GCCGAGAGCCATCTCATTCCGCC</u>   |                                 |
| 1094 | <i>sav_6835</i> | <i>ruvB</i>   | <u>ACCGCAAGGCACCGGC</u>          | putative Holliday junction      |
|      |                 |               | <u>GCCGCGGGCCGGACCCCCGGCCGGC</u> | DNA helicase subunit A          |
| 1095 | <i>sav_6833</i> | <i>ruvC</i>   | <u>ACCGAAAGGAAACTCCCGCC</u>      | putative Holliday junction      |
|      |                 |               | <u>ACCGACAACGACGGTGGGCCGGC</u>   | nuclease                        |
| 1096 | <i>sav_3542</i> | <i>savM1</i>  | <u>GCCGACGTGCCCTTGCCGCC</u>      | putative type II                |
|      |                 |               |                                  | restriction-modification system |
|      |                 |               |                                  | DNA adenine-specific            |
|      |                 |               |                                  | methylase                       |
| 1097 | <i>sav_3309</i> | <i>savR1</i>  | <u>GCCGCAACCGCTCGGGCACTGCC</u>   | putative Mrr restriction system |
|      |                 |               |                                  | protein                         |
| 1098 | <i>sav_1059</i> | <i>savR2</i>  | <u>GCCGCGTGGCGCCATAGGC</u>       | putative Mrr restriction system |
|      |                 |               |                                  | protein                         |
| 1099 | <i>sav_7055</i> | <i>sbcD</i>   | <u>ACCGCCCCCGAACGCCCGTCGGC</u>   | putative ATP-dependent          |
|      |                 |               | <u>GCCGACAGGC</u>                | dsDNA exonuclease               |
|      |                 |               | <u>ACCGACCACGCTAACGCCTGTCGGC</u> |                                 |
| 1100 | <i>sav_6510</i> | <i>scpA</i>   | <u>GCCGATCCCCCGCGCCCGCGGC</u>    | putative chromosome             |
|      |                 |               | <u>GCCGAGCAACCCGCGCCGTCGGC</u>   | segregation and condensation    |
|      |                 |               | <u>GCCGAGCAACCCGCGCCGTCGGC</u>   | protein A                       |
|      |                 |               | <u>GCCGAGCACCCCGCGTCGTCGGC</u>   |                                 |
|      |                 |               | <u>GCCGAGCACCCCGCGTCTCCCGCC</u>  |                                 |
|      |                 |               | <u>GCCGCTCCGCAGGCTCCGCC</u>      |                                 |
|      |                 |               | <u>GCCGACGACGCGGGACGACCGGC</u>   |                                 |
|      |                 |               | <u>GCCGACGGCGCGGGTTGCTCGGC</u>   |                                 |
|      |                 |               | <u>GCCGACGGCGCGGGTTGCTCGGC</u>   |                                 |
|      |                 |               | <u>GCCGACGACGCGGGACGACCGGC</u>   |                                 |
|      |                 |               | <u>GCCGACGACGCGGGGTGCTCGGC</u>   |                                 |
| 1101 | <i>sav_2658</i> | <i>smc</i>    | <u>GCCGCGAGCGGTCGTTCTCGGC</u>    | putative chromosome             |
|      |                 |               |                                  | segregation protein             |
| 1102 | <i>sav_5365</i> | <i>ssb2</i>   | <u>GCCGCGAGTTCAGACTGCC</u>       | putative single-strand          |
|      |                 |               |                                  | DNA-binding protein             |
| 1103 | <i>sav_6461</i> | <i>tldD</i>   | <u>GCCGCCCCGGC</u>               | modulator of DNA gyrase         |
| 1104 | <i>sav_4621</i> | <i>topA</i>   | <u>GCCGCCGACGGCCGCC</u>          | putative DNA topoisomerase I    |
|      |                 |               | <u>GCCGCCCCGGCGTCGCCACCAGCC</u>  |                                 |
| 1105 | <i>sav_7011</i> | <i>ung2</i>   | <u>GCCGATTGTAGTGGTTCGCC</u>      | putative uracil-DNA             |

|      |                 |              |                                                                                                                                                                 |                                                      |
|------|-----------------|--------------|-----------------------------------------------------------------------------------------------------------------------------------------------------------------|------------------------------------------------------|
| 1106 | <i>sav_4057</i> | <i>ushA</i>  | <u>ACCGCCTTGGCACAGCC</u>                                                                                                                                        | glycosylase<br>putative 5'-nucleotidase,<br>secreted |
| 1107 | <i>sav_6286</i> | <i>uvrA1</i> | <u>ACCGAACCGGC</u>                                                                                                                                              | putative excinuclease ABC<br>subunit A               |
| 1108 | <i>sav_2097</i> | <i>uvrA2</i> | <u>ACCGCGAAGGCGGGCCCGCC</u><br><u>GCCGCGCTCTGGGTATATTAGGC</u><br><u>GCCGCCTCGCTCGATCCGACCGGC</u>                                                                | putative excinuclease ABC<br>subunit A               |
| 1109 | <i>sav_6291</i> | <i>uvrC</i>  | <u>ACCGCATTGAAGCGTGTGTC</u><br><u>GCCGACCCCGGCATCGGCCGCGCC</u><br><u>GCCGCGCTGTCAGCCCCCGCC</u><br><u>GCCGATGCCGGGGTCGGC</u>                                     | putative excinuclease ABC<br>subunit C               |
| 1110 | <i>sav_3463</i> | <i>uvrD1</i> | <u>GCCGATCTCTTCCGGTCAGTCGCC</u><br><u>GCCGCACTCCCCAGGCCCGCC</u><br><u>GCCGCGTTACGGCCGGC</u><br><u>ACCGACAACCGGTCGCCGCC</u>                                      | putative ATP-dependent DNA<br>helicase               |
| 1111 | <i>sav_3077</i> | <i>uvrD2</i> | <u>ACCGCTCTGCACGCGCGGCAGCC</u>                                                                                                                                  | putative ATP-dependent DNA<br>helicase               |
| 1112 | <i>sav_3072</i> | <i>uvrD4</i> | <u>ACCGAAACAGCGACGCTCCGCC</u>                                                                                                                                   | putative ATP-dependent DNA<br>helicase               |
| 1113 | <i>sav_3</i>    |              | <u>GCCGCCATGAACCACCTCTGGC</u><br><u>ACCGACTACCGGC</u>                                                                                                           | putative endonuclease VII                            |
| 1114 | <i>sav_39</i>   |              | <u>GCCGCAGGGAGCGGCCCGTCGGC</u><br><u>ACCGAGGCTCGCC</u><br><u>GCCGCACGCCGCTGCCGGC</u>                                                                            | putative terminal protein Tpg<br>homolog             |
| 1115 | <i>sav_273</i>  |              | <u>ACCGCATCGCC</u><br><u>ACCGCCGACTCCACCGCC</u><br><u>GCCGAACGCTTCCTCGCC</u><br><u>ACCGCAGACTCGCC</u><br><u>ACCGCCCCGCCACCCGCGCACCGGC</u><br><u>GCCGCGCTGGC</u> | putative DNA<br>invertase/recombinase                |
| 1116 | <i>sav_279</i>  |              | <u>GCCGAGACCAGCC</u><br><u>GCCGCAGGCGTGCGGGCCCGGC</u><br><u>GCCGAAGAGGGGGTTGCC</u>                                                                              | putative endonuclease                                |
| 1117 | <i>sav_501</i>  |              | <u>GCCGACTGCC</u>                                                                                                                                               | putative nuclease                                    |
| 1118 | <i>sav_1131</i> |              | <u>GCCGATCAAGACGTCAGCC</u><br><u>GCCGAGGCCATACGCCCGGCCGGC</u><br><u>GCCGCCACCCCGTGACAGCC</u>                                                                    | putative alkylated DNA repair<br>protein             |
| 1119 | <i>sav_1443</i> |              | <u>ACCGAGCCGCAGATCGGC</u><br><u>GCCGATCTGCGGCTCGGTTAGCC</u><br><u>ACCGCTCCTCGCCATCGGC</u>                                                                       | putative DNA repair protein                          |
| 1120 | <i>sav_1696</i> |              | <u>GCCGATGTCGCC</u>                                                                                                                                             | putative DNA primase, small<br>subunit               |
| 1121 | <i>sav_2447</i> |              | <u>GCCGCGATCATAGTCGTCTGCC</u>                                                                                                                                   | putative DNA hydrolase                               |

|      |                 |  |                                                                                                                                         |                                     |
|------|-----------------|--|-----------------------------------------------------------------------------------------------------------------------------------------|-------------------------------------|
| 1122 | <i>sav_2450</i> |  | <u>GCCGCACCCCGCCACATGTCGCC</u>                                                                                                          | putative ATP-dependent DNA helicase |
| 1123 | <i>sav_2928</i> |  | <u>GCCGCCCCGC</u>                                                                                                                       | putative DNA repair helicase        |
| 1124 | <i>sav_3589</i> |  | <u>ACCGCAAGGCCGGC</u><br><u>ACCGCAAGGCCGGC</u><br><u>GCCGCGCCCGGC</u><br><u>ACCGCTCCCGCCGGC</u>                                         | putative deoxyribonuclease          |
| 1125 | <i>sav_5202</i> |  | <u>GCCGCACGACCAACGGGTCGCC</u>                                                                                                           | putative ATP-dependent helicase     |
| 1126 | <i>sav_5386</i> |  | <u>ACCGCTTCGCC</u>                                                                                                                      | putative endonuclease               |
| 1127 | <i>sav_6513</i> |  | <u>GCCGCGCCTTGACAGCC</u>                                                                                                                | putative DNA hydrolase              |
| 1128 | <i>sav_6714</i> |  | <u>ACCGACAGGCACCCCGCC</u>                                                                                                               | putative 5'-3' exonuclease          |
| 1129 | <i>sav_7440</i> |  | <u>GCCGAAGCGGTTGAGGACCGCC</u><br><u>GCCGCCCCGGCCCGGC</u><br><u>ACCGCCGTCGCC</u><br><u>ACCGCTTCGGC</u><br><u>ACCGCCGCACCCTGCTACCCGGC</u> | putative DNA polymerase beta chain  |

**RNA synthesis and modification (30)**

|      |                 |             |                                                                                                                                                                                        |                                                      |
|------|-----------------|-------------|----------------------------------------------------------------------------------------------------------------------------------------------------------------------------------------|------------------------------------------------------|
| 1130 | <i>sav_4027</i> | <i>dtd</i>  | <u>ACCGAGTGCCCCCGATCGGC</u>                                                                                                                                                            | putative D-tyrosyl-tRNA (Tyr) deacylase-like protein |
| 1131 | <i>sav_4310</i> | <i>gidB</i> | <u>GCCGAAGTTTGTGTCAGCC</u>                                                                                                                                                             | 16s ribosomal RNA small subunit methyltransferase    |
| 1132 | <i>sav_3301</i> | <i>greA</i> | <u>GCCGCTGAATTGTTAGGC</u>                                                                                                                                                              | putative transcription elongation factor             |
| 1133 | <i>sav_5260</i> | <i>orn</i>  | <u>GCCGCACCCGGCCCGGC</u>                                                                                                                                                               | putative 3'->5' exoribonuclease                      |
| 1134 | <i>sav_6925</i> | <i>rbpA</i> | <u>ACCGCCCTTTGGC</u><br><u>GCCGCCCCTTGTTGTACCCACCGGC</u>                                                                                                                               | RNA polymerase-binding protein                       |
| 1135 | <i>sav_5329</i> | <i>recD</i> | <u>GCCGACGGCGGACCGCC</u>                                                                                                                                                               | putative exodeoxyribonuclease                        |
| 1136 | <i>sav_3098</i> | <i>rhIE</i> | <u>GCCGACGTCCCGGC</u><br><u>GCCGAGGCCCTGGAAGCCGTCGGC</u><br><u>GCCGAGTGGCATGGGACCACTGCC</u><br><u>GCCGACGGCTTCCAGGGCCTCGGC</u>                                                         | putative ATP-dependent RNA helicase                  |
| 1137 | <i>sav_2642</i> | <i>rimM</i> | <u>GCCGCCTTCGGC</u>                                                                                                                                                                    | putative 16S rRNA processing protein                 |
| 1138 | <i>sav_2231</i> | <i>rnd</i>  | <u>ACCGCATCCGCCGATCACACCGCC</u>                                                                                                                                                        | putative ribonuclease D                              |
| 1139 | <i>sav_1138</i> | <i>rnhA</i> | <u>GCCGAAACCTCCGCC</u>                                                                                                                                                                 | putative ribonuclease H                              |
| 1140 | <i>sav_2453</i> | <i>rnhB</i> | <u>GCCGCACACCAGCC</u>                                                                                                                                                                  | putative ribonuclease HII                            |
| 1141 | <i>sav_5880</i> | <i>rnr</i>  | <u>GCCGCCCCACCCGCCCCCGCC</u><br><u>GCCGCCAAAATCCGCGTCACCGGC</u><br><u>GCCGCCCTTCGGC</u><br><u>GCCGCCACCCCGGC</u><br><u>GCCGCCACCCCGGC</u><br><u>ACCGCCACCGCC</u><br><u>GCCGCCCTGGC</u> | putative ribonuclease R                              |



|      |                 |              |                                  |                                 |
|------|-----------------|--------------|----------------------------------|---------------------------------|
|      |                 |              | <u>ACCGCCTCCCCTCCGGC</u>         |                                 |
|      |                 |              | <u>GCCGCCCACCGC</u>              |                                 |
|      |                 |              | <u>GCCGCCCC</u>                  |                                 |
|      |                 |              | <u>GCCGCCC GCCGGGACCTCCGGC</u>   |                                 |
|      |                 |              | <u>GCCGCCCC</u>                  |                                 |
| 1142 | <i>sav_5710</i> | <i>rphA</i>  | <u>GCCGCAGACGGGTGAGGGGCCGGC</u>  | putative ribonuclease PH        |
| 1143 | <i>sav_4953</i> | <i>rpoA</i>  | <u>ACCGCTCCGAAGAGCCGTACCGC</u>   | RNA polymerase alpha subunit    |
| 1144 | <i>sav_440</i>  | <i>rpoA2</i> | <u>ACCGCCAGGCAGGC</u>            | putative RNA polymerase         |
|      |                 |              | <u>GCCGAACCGC</u>                | alpha subunit                   |
| 1145 | <i>sav_4914</i> | <i>rpoB</i>  | <u>GCCGCCGGTGACAGGC</u>          | RNA polymerase beta subunit     |
| 1146 | <i>sav_1444</i> | <i>rsmC</i>  | <u>ACCGCCTCCTCGCCATCGGC</u>      | putative ribosomal RNA small    |
|      |                 |              | <u>GCCGATCTGCGGCTCGTTAGCC</u>    | subunit methyltransferase       |
|      |                 |              | <u>ACCGAGCCGCAGATCGGC</u>        |                                 |
| 1147 | <i>sav_6878</i> | <i>sun</i>   | <u>GCCGCGCCACCCAATCGGC</u>       | RNA-binding Sun protein         |
|      |                 |              | <u>GCCGCCC AACTCGGC</u>          |                                 |
|      |                 |              | <u>GCCGCCCAGCTCGGC</u>           |                                 |
| 1148 | <i>sav_4115</i> | <i>trmB</i>  | <u>GCCGCGCCCTGCTCGGGGTCGGC</u>   | putative tRNA                   |
|      |                 |              | <u>ACCGCTTGAAGGTCGCC</u>         | (guanine-N(7)-)-methyltransfer  |
|      |                 |              | <u>ACCGCCTCCCGGATACCGC</u>       | ase                             |
| 1149 | <i>sav_6740</i> | <i>tsnR2</i> | <u>GCCGACGCCGGC</u>              | putative rRNA                   |
|      |                 |              |                                  | methyltransferase               |
| 1150 | <i>sav_3211</i> | <i>xseA</i>  | <u>GCCGCACCCGGC</u>              | putative exoribonuclease, large |
|      |                 |              | <u>GCCGAAGATCGCC</u>             | subunit                         |
|      |                 |              | <u>ACCGACCCGGC</u>               |                                 |
|      |                 |              | <u>GCCGCGTTGTACAGGC</u>          |                                 |
|      |                 |              | <u>GCCGAACCGCCGGC</u>            |                                 |
| 1151 | <i>sav_75</i>   |              | <u>ACCGCCGGCGCCCCGGC</u>         | putative endoribonuclease       |
|      |                 |              | <u>ACCGCCGCAGCC</u>              | L-PSP                           |
| 1152 | <i>sav_992</i>  |              | <u>ACCGCGGGCCGGC</u>             | putative membrane protein,      |
|      |                 |              |                                  | ribonuclease BN-like family     |
| 1153 | <i>sav_1216</i> |              | <u>GCCGAGCGGGTGCATCCGATCGCC</u>  | putative membrane protein,      |
|      |                 |              | <u>GCCGCGGCAGAACCGGC</u>         | ribonuclease BN-like family     |
|      |                 |              | <u>ACCGCGATCGTCAGGAGCCACAGCC</u> |                                 |
|      |                 |              | <u>ACCGCCACCGCCACCGCCACTGCC</u>  |                                 |
| 1154 | <i>sav_2122</i> |              | <u>ACCGCCTGGC</u>                | putative integral membrane      |
|      |                 |              | <u>GCCGCGAGCCCTGGCCTACCGGC</u>   | protein, ribonuclease BN-like   |
|      |                 |              |                                  | family                          |
| 1155 | <i>sav_4123</i> |              | <u>ACCGCCTCTATGCGGTCCGGC</u>     | ATP-dependent RNA helicase      |
| 1156 | <i>sav_4155</i> |              | <u>ACCGCACGCGACGCTCCGCC</u>      | ATP-dependent RNA helicase      |
|      |                 |              | <u>GCCGACGCCGGC</u>              |                                 |
| 1157 | <i>sav_4446</i> |              | <u>ACCGCACCATCCCGGC</u>          | ATP-dependent RNA helicase      |
|      |                 |              | <u>ACCGCCCCGC</u>                |                                 |
| 1158 | <i>sav_6882</i> |              | <u>GCCGCCGATGCTGTACAGCC</u>      | putative guanyl-specific        |
|      |                 |              |                                  | ribonuclease Sa3 precursor      |

|                                                                  |                 |              |                                                                                                                           |                                                       |
|------------------------------------------------------------------|-----------------|--------------|---------------------------------------------------------------------------------------------------------------------------|-------------------------------------------------------|
| 1159                                                             | <i>sav_7054</i> |              | <u>GCCGCGTCGGCGCGGTCGGC</u>                                                                                               | (RNase Sa3)<br>putative ATP-dependent RNA<br>helicase |
| <b>Detoxification and adaptation to atypical conditions (52)</b> |                 |              |                                                                                                                           |                                                       |
| 1160                                                             | <i>sav_825</i>  | <i>aph1</i>  | <u>GCCGAGAGGCTCGCAGCC</u><br><u>GCCGACGCCCCTTGGC</u><br><u>ACCGCGTTTCCGCC</u>                                             | putative aminoglycoside<br>phosphotransferase         |
| 1161                                                             | <i>sav_5999</i> | <i>arsC</i>  | <u>ACCGCTCGGC</u>                                                                                                         | putative arsenate reductase                           |
| 1162                                                             | <i>sav_1302</i> | <i>axe1</i>  | <u>GCCGCGACCCGGC</u><br><u>ACCGATCGCCGGCCAACCGCC</u><br><u>GCCGACGTCGCGGGAACCCGGC</u><br><u>GCCGAGGGGGCCGCCAGGCCTTGCC</u> | putative acetyl xylan esterase                        |
| 1163                                                             | <i>sav_1261</i> | <i>blaA1</i> | <u>GCCGCAGAATGCCGCAGCC</u>                                                                                                | putative beta-lactamase,<br>secreted                  |
| 1164                                                             | <i>sav_5764</i> | <i>blaA4</i> | <u>GCCGCTCCTCTGCCGGCAGCC</u>                                                                                              | putative beta-lactamase                               |
| 1165                                                             | <i>sav_5791</i> | <i>blaA5</i> | <u>GCCGCCCTGTCCGCCACTTAGGC</u><br><u>GCCGCGGGCAGTCTCCGCC</u><br><u>GCCGCATCGAGGGGTCTGGCTCGCC</u>                          | putative beta-lactamase                               |
| 1166                                                             | <i>sav_660</i>  | <i>blaB1</i> | <u>GCCGACCCGCC</u><br><u>GCCGCCCTTCGTGACCGTTGCC</u>                                                                       | putative metallo-beta-lactamase                       |
| 1167                                                             | <i>sav_5568</i> | <i>blaB3</i> | <u>ACCGCCCTTGCC</u><br><u>GCCGCCCCGCCCGGC</u>                                                                             | putative metallo-beta-lactamase                       |
| 1168                                                             | <i>sav_4241</i> | <i>copC</i>  | <u>GCCGCTTCGCGAGGCAATTCCGGC</u>                                                                                           | putative copper resistance<br>protein, secreted       |
| 1169                                                             | <i>sav_1322</i> | <i>crcB2</i> | <u>GCCGCGATTCTTGCC</u><br><u>ACCGCGGCACCGCGGCCGCC</u>                                                                     | putative camphor resistance<br>protein CrcB           |
| 1170                                                             | <i>sav_3907</i> | <i>cspB1</i> | <u>GCCGCGCGCCCGGC</u><br><u>GCCGCCGGACCATTAGCC</u><br><u>ACCGAATTCCGCC</u>                                                | putative cold shock protein                           |
| 1171                                                             | <i>sav_3932</i> | <i>cspB2</i> | <u>GCCGCGGTCTGACGCGTTCCGGC</u>                                                                                            | putative cold shock protein                           |
| 1172                                                             | <i>sav_826</i>  | <i>cspD1</i> | <u>ACCGACGGCGACCCGGC</u><br><u>GCCGCGTAGCCAGGC</u><br><u>ACCGATCCGCAGTCGCCTGGC</u>                                        | putative cold shock protein                           |
| 1173                                                             | <i>sav_893</i>  | <i>cspD2</i> | <u>GCCGACAGGCGGTAGCC</u><br><u>GCCGAGACGGCAGTCCTGCGCCGCC</u><br><u>GCCGCACCCCGCTGGC</u><br><u>GCCGCGCACCGGCTACCGCC</u>    | putative cold shock protein                           |
| 1174                                                             | <i>sav_4154</i> | <i>cspD3</i> | <u>ACCGCGTTCCCGGC</u><br><u>GCCGCGTCGCCGGCACGCCCTGCC</u><br><u>ACCGCGGCCACAGATATGGGTCTGGC</u>                             | putative cold shock protein                           |
| 1175                                                             | <i>sav_4447</i> | <i>cspD4</i> | <u>GCCGCACTAGATATCTGGCCCGGC</u>                                                                                           | putative cold shock protein                           |
| 1176                                                             | <i>sav_4776</i> | <i>cspD5</i> | <u>GCCGCGGTGCCACCGCCGCC</u><br><u>GCCGCCCCGTTCCCTCGCC</u><br><u>ACCGCGCGGGAACGAGGCCGGC</u>                                | putative cold shock protein                           |

|      |                 |              |                                                                                                                                                                                                                                 |                                                                                                            |
|------|-----------------|--------------|---------------------------------------------------------------------------------------------------------------------------------------------------------------------------------------------------------------------------------|------------------------------------------------------------------------------------------------------------|
| 1177 | <i>sav_1622</i> | <i>gbsA1</i> | <u>GCCGCGATGATTGCCCTGCC</u><br><u>GCCGCACGTCCCGCTCCCGCC</u><br><u>GCCGCTCCGGCCCGGC</u><br><u>GCCGACCTGCCCTCGGGTTCAGGC</u><br><u>GCCGAAGCCGTCCTACCGCC</u>                                                                        | putative glycine betaine<br>aldehyde dehydrogenase                                                         |
| 1178 | <i>sav_3434</i> | <i>gbsA2</i> | <u>GCCGCGACACGGACGAGTCGCC</u><br><u>GCCGCTCGGC</u><br><u>GCCGCACACTTTCGGC</u>                                                                                                                                                   | putative glycine betaine<br>aldehyde dehydrogenase                                                         |
| 1179 | <i>sav_2672</i> | <i>htpG</i>  | <u>ACCGCCCGACCCCGCGCCGTCGCC</u>                                                                                                                                                                                                 | putative heat shock protein,<br>Hsp90-family                                                               |
| 1180 | <i>sav_6003</i> | <i>htpX2</i> | <u>GCCGCAGCGGAAAGTCCGGC</u><br><u>GCCGACAGCC</u><br><u>ACCGCCATTAAAGGCTAGCCGCC</u><br><u>GCCGACAGCC</u><br><u>GCCGCAATCCGGGGGTACACCGGC</u>                                                                                      | putative heat shock protein,<br>protease                                                                   |
| 1181 | <i>sav_3961</i> | <i>hur</i>   | <u>ACCGCCCACCCGGGACCTCGCC</u>                                                                                                                                                                                                   | putative hydroxyurea<br>phosphotransferase                                                                 |
| 1182 | <i>sav_3224</i> | <i>katA2</i> | <u>GCCGACGTCCCGTCGGC</u><br><u>GCCGACGGGACGTCGGC</u>                                                                                                                                                                            | putative catalase                                                                                          |
| 1183 | <i>sav_348</i>  | <i>katB</i>  | <u>GCCGCGCGGCGCCCGCC</u><br><u>GCCGCGCAGCCGAAATGAATCGCC</u><br><u>GCCGCACTCTCTTCGGC</u><br><u>GCCGCCTTCTCATATTCGCC</u><br><u>ACCGCGACCGTGGCCGGC</u>                                                                             | putative catalase                                                                                          |
| 1184 | <i>sav_3587</i> | <i>ksgA</i>  | <u>GCCGCCGCTGCC</u><br><u>ACCGAGCCGCCGTGAGGCTGGC</u><br><u>GCCGCACCGCGGCACGCGCCCGGC</u><br><u>ACCGCGGCACGCGCCCGGC</u><br><u>ACCGCGGCACGCGCCCGTCCGCC</u><br><u>ACCGCAGCCCGCC</u><br><u>GCCGCGCCAGGC</u><br><u>GCCGAGGCCGCGCC</u> | putative dimethyladenosine<br>transferase                                                                  |
| 1185 | <i>sav_299</i>  | <i>lipW</i>  | <u>GCCGACTCCTGCGCGACAGCC</u><br><u>GCCGAAGTGGCCGACCAGGTCGCC</u><br><u>ACCGCGGCCGACCGGC</u>                                                                                                                                      | putative secreted<br>esterase/lipase                                                                       |
| 1186 | <i>sav_3790</i> | <i>mdmB</i>  | <u>ACCGCCGGTGCTCGCC</u>                                                                                                                                                                                                         | putative macrolide<br>O-acyltransferase                                                                    |
| 1187 | <i>sav_1605</i> | <i>mrgA1</i> | <u>ACCGCCCGCC</u><br><u>ACCGACGGCGGGCGGTGCACCTGCC</u>                                                                                                                                                                           | putative starvation-induced<br>DNA protecting protein                                                      |
| 1188 | <i>sav_4058</i> | <i>mshD</i>  | <u>ACCGCCTTGGCACAGCC</u>                                                                                                                                                                                                        | putative<br>N-cysteinyl-1-D-myo-inosityl-<br>2-amino-2-deoxy-alpha-D-gluc<br>opyranoside acetyltransferase |
| 1189 | <i>sav_1531</i> | <i>nos</i>   | <u>ACCGCGAGCCGCC</u>                                                                                                                                                                                                            | putative nitric oxide synthase                                                                             |

|      |                 |              |                                                                                                                                                    |                                                                                                 |
|------|-----------------|--------------|----------------------------------------------------------------------------------------------------------------------------------------------------|-------------------------------------------------------------------------------------------------|
| 1190 | <i>sav_3610</i> | <i>ohrB1</i> | <u>GCCGCGGGTTACCCGCGGTTGCC</u><br><u>ACCGCGAACGGGCGCCTACCGGC</u><br><u>GCCGCTGTCGACACCCGCC</u>                                                     | putative organic hydroperoxide<br>resistance protein                                            |
| 1191 | <i>sav_1862</i> | <i>osmC</i>  | <u>GCCGAGTGC GACTCCGCC</u><br><u>GCCGAACCGGC</u>                                                                                                   | putative osmotically inducible<br>protein                                                       |
| 1192 | <i>sav_4171</i> | <i>pacB2</i> | <u>ACCGATGATCGCGCCTACCGGC</u><br><u>GCCGCAATCGAAGTTAGGTTAGCC</u><br><u>ACCGCGGGGAACCGGC</u>                                                        | putative penicillin acylase                                                                     |
| 1193 | <i>sav_6608</i> | <i>pacB3</i> | <u>ACCGCCATAAGCCACCCGCC</u><br><u>GCCGCTGTCAGCCGCTGTCGGC</u><br><u>GCCGCCGACAGGC</u>                                                               | putative penicillin acylase,<br>secreted                                                        |
| 1194 | <i>sav_7231</i> | <i>pfp12</i> | <u>ACCGAGGCCCGGGTCGCC</u>                                                                                                                          | putative intracellular<br>protease/amidase                                                      |
| 1195 | <i>sav_2523</i> | <i>pnp</i>   | <u>ACCGAGGACCGGC</u>                                                                                                                               | putative guanosine<br>pentaphosphate<br>synthetase/polyribonucleotide<br>nucleotidyltransferase |
| 1196 | <i>sav_1427</i> | <i>terA</i>  | <u>GCCGAGTTCCTGGCGGGTTACCGGC</u><br><u>ACCGACAGACTGCC</u><br><u>ACCGCCGGTAACCCGCC</u><br><u>ACCGAGACCCACCGGAAGATCGCC</u><br><u>GCCGCCGCGCCAGGC</u> | putative tellurium resistance<br>protein                                                        |
| 1197 | <i>sav_896</i>  | <i>terD1</i> | <u>GCCGCCAGGACGGATCGGC</u><br><u>ACCGCCCCTTCGCCTACAGGC</u><br><u>GCCGATCCGTCCTGGC</u><br><u>GCCGCCACACTGGCCGTCGGC</u>                              | putative tellurium resistance<br>protein                                                        |
| 1198 | <i>sav_5804</i> | <i>terD4</i> | <u>GCCGAAGACCGCCCGGC</u>                                                                                                                           | putative tellurium resistance<br>protein                                                        |
| 1199 | <i>sav_6274</i> | <i>terD6</i> | <u>ACCGCCCCGTCCGACCGCC</u><br><u>GCCGAACCCCGGGCCGCC</u>                                                                                            | putative tellurium resistance<br>protein                                                        |
| 1200 | <i>sav_7507</i> | <i>tetM</i>  | <u>GCCGCGAGCGGCGCCGATCGCC</u>                                                                                                                      | putative tetracycline resistance<br>protein                                                     |
| 1201 | <i>sav_737</i>  |              | <u>GCCGCAACCCACGACCGGC</u><br><u>GCCGACCATCGCGCCGCC</u>                                                                                            | putative 2-haloalkanoic acid<br>dehalogenase                                                    |
| 1202 | <i>sav_1149</i> |              | <u>GCCGAAGGGGAAGGGATCGGC</u><br><u>GCCGATCCCTTCCCCTTCGGC</u><br><u>GCCGAGGCGATGGGCCGGC</u>                                                         | putative secreted esterase                                                                      |
| 1203 | <i>sav_1260</i> |              | <u>GCCGCAGAATGCCGCAGCC</u>                                                                                                                         | putative dioxygenase                                                                            |
| 1204 | <i>sav_1275</i> |              | <u>GCCGAAGTCGAAGACGATCGCC</u>                                                                                                                      | putative stress-inducible<br>protein                                                            |
| 1205 | <i>sav_1595</i> |              | <u>GCCGCGTGCTCGGC</u><br><u>GCCGCCGACGCGCCGACCTGCC</u><br><u>GCCGCCGACACCGGGGAGCCCGGC</u><br><u>GCCGCGTCGGC</u>                                    | putative<br>3-ketosteroid-delta-1-dehydrog<br>enase                                             |

|                                         |                 |              |                                                                                                                     |                                                     |
|-----------------------------------------|-----------------|--------------|---------------------------------------------------------------------------------------------------------------------|-----------------------------------------------------|
| 1206                                    | <i>sav_2113</i> |              | <u>GCCGCGACCCGACCGTCGCC</u><br><u>GCCGCCCGAACGGATATGTGTCGGC</u>                                                     | putative carboxylaseterase,<br>secreted             |
| 1207                                    | <i>sav_2605</i> |              | <u>GCCGCGCGGCTCAGACCTCAGCC</u><br><u>ACCGGTCGACAGCCCCATAGCC</u>                                                     | putative dioxygenase                                |
| 1208                                    | <i>sav_5004</i> |              | <u>ACCGCCCGCCGCC</u><br><u>GCCGCTACACGGAGGGACCGCC</u>                                                               | putative beta-lactamase,<br>secreted                |
| 1209                                    | <i>sav_5965</i> |              | <u>GCCGCAGTGCAGGC</u><br><u>GCCGCTGCGCGGGCTCCGCC</u>                                                                | putative hydrolase                                  |
| 1210                                    | <i>sav_6193</i> |              | <u>GCCGCGACCCCCACCGGC</u><br><u>GCCGAGGGTATGTCACAGCTGCC</u>                                                         | putative toxic cation resistance<br>protein         |
| 1211                                    | <i>sav_6951</i> |              | <u>GCCGCTTCCCCAACCCCTGCC</u>                                                                                        | putative sarcosine<br>dehydrogenase                 |
| <b>Cell wall and cell envelope (20)</b> |                 |              |                                                                                                                     |                                                     |
| 1212                                    | <i>sav_3413</i> | <i>dacB</i>  | <u>GCCGACGCTCCCCACCCCGGC</u>                                                                                        | putative D-alanyl-D-alanine<br>carboxypeptidase     |
| 1213                                    | <i>sav_3781</i> | <i>dacC</i>  | <u>ACCGAACCGTGAATCCTCGCC</u>                                                                                        | putative D-alanyl-D-alanine<br>carboxypeptidase     |
| 1214                                    | <i>sav_4379</i> | <i>dacD</i>  | <u>GCCGCCGCAGTGATCACTGCCGGC</u>                                                                                     | putative D-alanyl-D-alanine<br>carboxypeptidase     |
| 1215                                    | <i>sav_4662</i> | <i>dacE</i>  | <u>ACCGCGACTGGCGCGGACCGCC</u><br><u>ACCGCGACCGGC</u>                                                                | putative D-alanyl-D-alanine<br>carboxypeptidase     |
| 1216                                    | <i>sav_3561</i> | <i>glmU</i>  | <u>GCCGAGCATCGCTCCCCCGCC</u>                                                                                        | UDP-N-acetylglucosamine<br>pyrophosphorylase        |
| 1217                                    | <i>sav_5128</i> | <i>murA1</i> | <u>GCCGAGGCGCTCGGC</u><br><u>GCCGAGCGCCTCGGC</u>                                                                    | UDP-N-acetylglucosamine<br>transferase              |
| 1218                                    | <i>sav_2260</i> | <i>murA2</i> | <u>GCCGCCAACTGGCCTGCC</u>                                                                                           | UDP-N-acetylglucosamine<br>transferase              |
| 1219                                    | <i>sav_5214</i> | <i>nagD</i>  | <u>GCCGCGACCGCCGCC</u>                                                                                              | putative N-acetyl-glucosamine<br>catabolism protein |
| 1220                                    | <i>sav_3393</i> | <i>nagZ2</i> | <u>GCCGAGGACCCCCGCTGCC</u>                                                                                          | beta-N-acetylhexosaminidase,<br>secreted            |
| 1221                                    | <i>sav_5268</i> | <i>nagZ4</i> | <u>ACCGCCTGCTTGGC</u><br><u>GCCGCGCCTGCACCCCTGCC</u><br><u>ACCGCGCCGCTCCCGCC</u><br><u>GCCGCAGGAACCAGCCAAGCAGGC</u> | beta-N-acetylhexosaminidase,<br>secreted            |
| 1222                                    | <i>sav_5302</i> | <i>nagZ5</i> | <u>ACCGACTTCCCGGC</u><br><u>GCCGCACGCGCCCGGC</u><br><u>GCCGCCCCGGCTCGGC</u><br><u>ACCGCACCGCGGAGACTCATCCGGC</u>     | beta-N-acetylhexosaminidase,<br>secreted            |
| 1223                                    | <i>sav_4294</i> | <i>pbp5</i>  | <u>ACCGATTCGTAGGAAGCAAGTTGCC</u><br><u>ACCGAAGTTCACCCCAAATCAGGC</u>                                                 | putative penicillin-binding<br>protein              |
| 1224                                    | <i>sav_5179</i> | <i>pbp9</i>  | <u>GCCGCAGCCGCAGCAGAGCAGCC</u><br><u>ACCGCTCCGGACACCGCC</u><br><u>GCCGAAACGGCCCAAGCGCACCGGC</u>                     | putative penicillin-binding<br>protein              |

|      |                 |              |                                                                                |                                                        |
|------|-----------------|--------------|--------------------------------------------------------------------------------|--------------------------------------------------------|
|      |                 |              | <u>GCCGCCAGGTCGGGATCAGCCGGC</u>                                                |                                                        |
| 1225 | <i>sav_5458</i> | <i>pbp10</i> | <u>ACCGCCCGTGTCCACAGGTTCCGCC</u>                                               | putative penicillin-binding protein                    |
| 1226 | <i>sav_7219</i> | <i>pbp12</i> | <u>GCCGCGAGCAGGGTCAGGC</u><br><u>ACCGATTCGGC</u><br><u>ACCGCGAGCCCCCTGCC</u>   | putative penicillin-binding protein                    |
| 1227 | <i>sav_2311</i> | <i>tagE</i>  | <u>GCCGCGCGGCCATAGGC</u>                                                       | UDP-glucose:polyglycerol phosphate glucosyltransferase |
| 1228 | <i>sav_444</i>  | <i>wapA</i>  | <u>GCCGCTGGGTGGACCTGGC</u>                                                     | putative cell wall-associated protein                  |
| 1229 | <i>sav_4989</i> |              | <u>GCCGAGGTGTCGGCCCCGGC</u><br><u>ACCGACTGGC</u><br><u>GCCGACACCTCGGC</u>      | putative polysaccharide deacetylase, secreted          |
| 1230 | <i>sav_6420</i> |              | <u>GCCGCGATCCTGCCAGGC</u><br><u>ACCGATACATATCGCC</u><br><u>GCCGCACACGTCGCC</u> | putative lysozyme precursor, secreted                  |
| 1231 | <i>sav_7297</i> |              | <u>GCCGACTCGGC</u><br><u>GCCGACCGCACCGGC</u><br><u>GCCGAGTCGGC</u>             | putative oligosaccharide deacetylase, secreted         |

#### Cell division and differentiation (25)

|      |                 |              |                                                                                                                    |                                               |
|------|-----------------|--------------|--------------------------------------------------------------------------------------------------------------------|-----------------------------------------------|
| 1232 | <i>sav_4026</i> | <i>amfC</i>  | <u>ACCGAGTGCCCCGATCGGC</u>                                                                                         | putative AmfC protein                         |
| 1233 | <i>sav_2529</i> | <i>bldB</i>  | <u>ACCGAGGGATCAGCC</u>                                                                                             | putative BldB protein                         |
| 1234 | <i>sav_3007</i> | <i>eshA</i>  | <u>ACCGCGGAAGGAACAGGC</u>                                                                                          | putative nucleotide-binding protein           |
| 1235 | <i>sav_5104</i> | <i>ftsE</i>  | <u>GCCGCTGCCCTGTCTGCC</u><br><u>GCCGAAATCCGCGGAACCTGGC</u>                                                         | putative cell division ATP-binding protein    |
| 1236 | <i>sav_4666</i> | <i>ftsH</i>  | <u>GCCGCAGGGGACTGCC</u><br><u>GCCGCCCCGTCCCTCCTGCC</u>                                                             | putative cell division protein FtsH           |
| 1237 | <i>sav_2510</i> | <i>ftsK</i>  | <u>GCCGAAGCCGTCGCC</u>                                                                                             | putative DNA translocase FtsK                 |
| 1238 | <i>sav_6123</i> | <i>ftsQ</i>  | <u>GCCGCGCCGCGGACCGCC</u><br><u>GCCGCGGCAGATGTACTGGC</u><br><u>GCCGCGGCTTTGGCGGTCGCC</u><br><u>GCCGCGTGGTCCGCC</u> | putative cell division septal protein FtsQ    |
| 1239 | <i>sav_6121</i> | <i>ftsW1</i> | <u>GCCGCCTCGCC</u><br><u>ACCGCTCAGGC</u>                                                                           | putative cell division membrane protein FtsW  |
| 1240 | <i>sav_2654</i> | <i>ftsY</i>  | <u>GCCGAGGGACATAGGC</u>                                                                                            | putative signal recognition particle receptor |
| 1241 | <i>sav_6124</i> | <i>ftsZ</i>  | <u>ACCGCCGATAGGC</u>                                                                                               | putative cell division GTPase FtsZ            |
| 1242 | <i>sav_3255</i> | <i>minD1</i> | <u>GCCGCGATGCGCTCAGCC</u>                                                                                          | putative septum site determining protein      |
| 1243 | <i>sav_4605</i> | <i>minD2</i> | <u>GCCGATGCGAACCGGC</u>                                                                                            | putative septum site determining protein      |
| 1244 | <i>sav_5455</i> | <i>mreB1</i> | <u>GCCGCCCCAGGTCGGC</u>                                                                                            | putative rod shape-determining                |

|                                             |                 |              |                                                                                                                                                                              |                                                                          |
|---------------------------------------------|-----------------|--------------|------------------------------------------------------------------------------------------------------------------------------------------------------------------------------|--------------------------------------------------------------------------|
| 1245                                        | <i>sav_5720</i> | <i>mreB2</i> | <u>GCCGACGGTGTGATCCTCGGC</u><br><u>GCCGATCCACCCGTCCGGC</u><br><u>ACCGCCGCCCGGC</u><br><u>GCCGAGGATCACACCGTCGGC</u><br><u>GCCGCCGGACGGGTGGATCGGC</u>                          | protein<br>putative rod shape-determining protein                        |
| 1246                                        | <i>sav_4309</i> | <i>parA1</i> | <u>GCCGAACCCTGGCGACTCCGGC</u>                                                                                                                                                | putative partitioning or sporulation protein                             |
| 1247                                        | <i>sav_6508</i> | <i>parA2</i> | <u>GCCGACACATCGGGTCGGGTCCGGC</u><br><u>GCCGACGATTGGC</u><br><u>GCCGACAGCC</u>                                                                                                | putative partitioning or sporulation protein                             |
| 1248                                        | <i>sav_6650</i> | <i>parJ</i>  | <u>GCCGAGTGCACACCGGC</u><br><u>GCCGCCTGCC</u>                                                                                                                                | putative protein interacts with ParA                                     |
| 1249                                        | <i>sav_4113</i> | <i>sap</i>   | <u>GCCGAGCACGCTCCGTACAGGC</u><br><u>GCCGCCCGCGGGATGTAGGC</u><br><u>GCCGCGCTGGC</u>                                                                                           | putative sporulation associated protein, secreted                        |
| 1250                                        | <i>sav_5140</i> | <i>sdrA</i>  | <u>GCCGATCCGGCCCCGCGCCGCC</u><br><u>GCCGAGCCGCCTGACCCCCCTCGCC</u><br><u>GCCGCCCGCCCGTCCCCCACC GCC</u>                                                                        | putative protein involving differentiation                               |
| 1251                                        | <i>sav_5142</i> | <i>sdrC</i>  | <u>GCCGAACCTCGCCCTCGCCGCC</u><br><u>GCCGCGTACGCCGGGCATCGGC</u><br><u>ACCGAGCCGCCGCC</u><br><u>ACCGACTGCGCTCTTCTTCGGC</u><br><u>GCCGATGCCCGGC</u><br><u>GCCGCAGCGCGTCCGGC</u> | putative secreted protein                                                |
| 1252                                        | <i>sav_1431</i> | <i>spoVK</i> | <u>GCCGAACTGTTTCGGC</u>                                                                                                                                                      | putative sporulation protein K-like protein                              |
| 1253                                        | <i>sav_6810</i> | <i>ssgC</i>  | <u>GCCGAGCCCCCGCTCCGGC</u>                                                                                                                                                   | putative cell division protein (probably reverse function of SsgA)       |
| 1254                                        | <i>sav_580</i>  | <i>ssgZ</i>  | <u>ACCGCCAGGC</u>                                                                                                                                                            | putative SsgA homolog (the deletion was not affected on the sporulation) |
| 1255                                        | <i>sav_5446</i> | <i>tig</i>   | <u>GCCGCACTGCC</u><br><u>GCCGACTCGGC</u><br><u>GCCGCATTTTCGCGGGCTCCGGC</u><br><u>GCCGAGTCGGC</u>                                                                             | putative cell division trigger factor                                    |
| 1256                                        | <i>sav_2528</i> |              | <u>ACCGCGGACGTCCGCC</u><br><u>GCCGCGACCCCGCGGGTTCGGC</u><br><u>GCCGCTCACCTCGAAGTGACCGGC</u><br><u>GCCGCGGATCGGC</u><br><u>ACCGAGTTGTTCCGTCCGCCGCC</u>                        | putative FtsK/SpoIIIE family protein                                     |
| <b>Transport and binding proteins (213)</b> |                 |              |                                                                                                                                                                              |                                                                          |
| 1257                                        | <i>sav_7503</i> | <i>amfT</i>  | <u>ACCGCGGACCGGCCGCC</u>                                                                                                                                                     | putative membrane translocator                                           |

|      |                 |               |                                                                                                                                                                                           |                                                                       |
|------|-----------------|---------------|-------------------------------------------------------------------------------------------------------------------------------------------------------------------------------------------|-----------------------------------------------------------------------|
|      |                 |               | <u>ACCGAGCCTTCCAGCC</u>                                                                                                                                                                   |                                                                       |
| 1258 | <i>sav_1943</i> | <i>amiS</i>   | <u>GCCGCATCCCCGGCAGCTCACCGGC</u>                                                                                                                                                          | putative acetamide transporter protein                                |
| 1259 | <i>sav_2651</i> | <i>amtB1</i>  | <u>GCCGCGGCCGCCATCCCGAACCGCC</u><br><u>GCCGCGGCCGGTTTTCTGCC</u><br><u>ACCGCTCAGGTTTCGCC</u><br><u>GCCGCGGCTGCC</u>                                                                        | putative ammonium transporter                                         |
| 1260 | <i>sav_1677</i> | <i>ansP2</i>  | <u>ACCGCGTCGCCGCC</u>                                                                                                                                                                     | putative L-asparagine permease                                        |
| 1261 | <i>sav_2982</i> | <i>aotJ</i>   | <u>GCCGACGAGATGTCTCCTGGC</u><br><u>ACCGAAGATCTTCCGGC</u><br><u>GCCGATGGCCGGCGTTGCTGCC</u>                                                                                                 | putative arginine/ornithine ABC transporter substrate-binding protein |
| 1262 | <i>sav_7263</i> | <i>araN</i>   | <u>GCCGCGCACCCGCC</u><br><u>GCCGCCCCACCCGCC</u>                                                                                                                                           | putative L-arabinose ABC transporter substrate-binding protein        |
| 1263 | <i>sav_7477</i> | <i>arsB</i>   | <u>GCCGACCGGCCCCGGC</u>                                                                                                                                                                   | putative membrane efflux protein                                      |
| 1264 | <i>sav_2887</i> | <i>atpB</i>   | <u>GCCGCGCCGACACATTGAGGTTGCC</u>                                                                                                                                                          | F-type proton-transporting ATPase A chain                             |
| 1265 | <i>sav_3176</i> | <i>bldKA2</i> | <u>ACCGATAGGC</u><br><u>GCCGCCCTCGCC</u><br><u>GCCGAGCCGGTGGCCGCCACAGGC</u>                                                                                                               | putative peptide ABC transporter permease protein                     |
| 1266 | <i>sav_3152</i> | <i>bldKC1</i> | <u>GCCGCCCCACTCCTTCGGCCCGCC</u>                                                                                                                                                           | putative peptide ABC transporter permease protein                     |
| 1267 | <i>sav_3174</i> | <i>bldKC2</i> | <u>GCCGCCCGCGTCGCTGAGCAGGC</u>                                                                                                                                                            | putative peptide ABC transporter permease protein                     |
| 1268 | <i>sav_5256</i> | <i>cebE</i>   | <u>GCCGAAAAGGCCTCATCGGC</u><br><u>GCCGACGGGCCTGAATACCGCC</u><br><u>GCCGATAACTGAACGCATCTCGCC</u><br><u>GCCGCACCGGGGCCGGTCCCGGC</u><br><u>GCCGATGAGGCCTTTTCGGC</u><br><u>GCCGACCCCCCGGC</u> | putative cellobiose ABC transporter substrate-binding protein         |
| 1269 | <i>sav_6277</i> | <i>chaA</i>   | <u>ACCGA CCCGAAGAAGTGCCCGGC</u><br><u>GCCGACTGCCCGGCCGCC</u>                                                                                                                              | putative ionic transporter integral membrane protein                  |
| 1270 | <i>sav_2036</i> | <i>corA4</i>  | <u>GCCGAGGCCGTTTGCC</u>                                                                                                                                                                   | putative metal-transport protein                                      |
| 1271 | <i>sav_877</i>  | <i>cpt</i>    | <u>GCCGCACGGGCTGCCGGAGCAGCC</u><br><u>GCCGCGCTCCCGTGAACTCAGGC</u>                                                                                                                         | putative chloramphenicol 3-O phosphotransferase                       |
| 1272 | <i>sav_3022</i> | <i>dasA1</i>  | <u>GCCGACCTGTCCGATCGGC</u><br><u>GCCGCTTCGGC</u>                                                                                                                                          | putative multiple sugar ABC transporter substrate-binding protein     |
| 1273 | <i>sav_5131</i> | <i>dasA2</i>  | <u>ACCGCTCCCCCGCGGCCCTGCC</u>                                                                                                                                                             | putative multiple sugar ABC transporter substrate-binding protein     |
| 1274 | <i>sav_7329</i> | <i>dasA3</i>  | <u>GCCGACGTCTCGCGCTCCGCC</u>                                                                                                                                                              | putative multiple sugar ABC transporter substrate-binding             |



|      |                 |              |                                                                                                                                                                                       |                                                                                            |
|------|-----------------|--------------|---------------------------------------------------------------------------------------------------------------------------------------------------------------------------------------|--------------------------------------------------------------------------------------------|
| 1275 | <i>sav_5139</i> | <i>ebrB</i>  | <u>GCCGCACGGCCGTCGCC</u>                                                                                                                                                              | protein<br>putative multidrug resistance<br>efflux protein                                 |
| 1276 | <i>sav_6334</i> | <i>emrE</i>  | <u>GCCGCACACGTCCTGCC</u>                                                                                                                                                              | putative SMR-type multi-drug<br>efflux transporter                                         |
| 1277 | <i>sav_601</i>  | <i>fecD1</i> | <u>GCCGCCTGCGGCTGCCGCTCGCC</u><br><u>GCCGACGACGGCGAGCGGCAGCC</u>                                                                                                                      | putative ABC transporter iron<br>(III)/siderophore transport<br>system ATP-binding protein |
| 1278 | <i>sav_6491</i> | <i>fepD</i>  | <u>GCCGCCTGCCGGC</u>                                                                                                                                                                  | putative ABC transporter iron<br>(III)/siderophore permease<br>protein                     |
| 1279 | <i>sav_5704</i> | <i>frcB</i>  | <u>GCCGAGAGAGAGCAGCC</u><br><u>GCCGCGTCGCC</u>                                                                                                                                        | putative fructose ABC<br>transporter substrate-binding<br>protein                          |
| 1280 | <i>sav_5703</i> | <i>frcC</i>  | <u>GCCGCCCCCTAGGC</u><br><u>ACCGCCCCCTTGTCCCGGC</u><br><u>GCCGACCGCC</u>                                                                                                              | putative fructose ABC<br>transporter permease protein                                      |
| 1281 | <i>sav_3688</i> | <i>fruA</i>  | <u>ACCGCACCACCCCTCGGC</u>                                                                                                                                                             | putative fructose-specific<br>permease                                                     |
| 1282 | <i>sav_6964</i> | <i>glpF2</i> | <u>ACCGAGGCCGGC</u><br><u>GCCGCATTCGGGCGTCTCCAGGC</u><br><u>GCCGCAAAGAGGACACGCTCGGC</u>                                                                                               | putative glycerol uptake<br>facilitator protein                                            |
| 1283 | <i>sav_7200</i> | <i>glpF3</i> | <u>ACCGCGCCCCTCGGC</u><br><u>GCCGCTTCGAGCCCTTGGC</u><br><u>GCCGCGTTCGCC</u><br><u>GCCGAGGGGCGCGGTGGCCCCGCC</u><br><u>GCCGCCCGCC</u><br><u>GCCGCGCATCGTCGGC</u><br><u>ACCGCATTTGCC</u> | putative glycerol uptake<br>facilitator protein                                            |
| 1284 | <i>sav_6400</i> | <i>gltI2</i> | <u>GCCGATCCCGCCGCC</u><br><u>GCCGCGGCGGGCGGATCGGC</u>                                                                                                                                 | putative polar amino acid ABC<br>transporter substrate-binding<br>protein                  |
| 1285 | <i>sav_7208</i> | <i>gltK3</i> | <u>ACCGCACAGCGGCGCCCCGCC</u><br><u>ACCGCCCCGGGCTCTGCCCGCC</u><br><u>GCCGCCGCGGTGTGCTCTCCGCC</u><br><u>GCCGCCGTGTGCCGTCGCGCTCGCC</u>                                                   | putative polar amino acid ABC<br>transporter substrate-binding<br>protein                  |
| 1286 | <i>sav_1963</i> | <i>gluA1</i> | <u>GCCGCAAATATCCAGCC</u>                                                                                                                                                              | putative glutamate ABC<br>transporter ATP-binding<br>protein                               |
| 1287 | <i>sav_3277</i> | <i>gntP</i>  | <u>GCCGCGATCCCCCTGCC</u>                                                                                                                                                              | putative low-affinity gluconate<br>transporter                                             |
| 1288 | <i>sav_6283</i> | <i>gltL2</i> | <u>GCCGCCGGCCTTCGACCCCGCC</u>                                                                                                                                                         | putative polar amino acid ABC<br>transporter substrate-binding<br>protein                  |

|      |                 |              |                                  |                                                                           |
|------|-----------------|--------------|----------------------------------|---------------------------------------------------------------------------|
| 1289 | <i>sav_7151</i> | <i>iolTA</i> | <u>GCCGCGTCATCGGC</u>            | myo-inositol ABC transporter<br>substrate-binding protein                 |
|      |                 |              | <u>ACCGCACCAGGC</u>              |                                                                           |
| 1290 | <i>sav_919</i>  | <i>kdpA</i>  | <u>GCCGACCTGGC</u>               | putative potassium-transporting<br>ATPase subunit A                       |
|      |                 |              | <u>ACCGCCGAAAACGTCGTCGGC</u>     |                                                                           |
|      |                 |              | <u>ACCGCCTCTCTGGC</u>            |                                                                           |
|      |                 |              | <u>GCCGACGACGTTTTCGGC</u>        |                                                                           |
| 1291 | <i>sav_2636</i> | <i>lepB1</i> | <u>GCCGATCTTCCGCGGCCCGGC</u>     | putative signal peptidase I                                               |
|      |                 |              | <u>GCCGCGGAAGATCGGC</u>          |                                                                           |
| 1292 | <i>sav_6164</i> | <i>livF2</i> | <u>GCCGACCCCTGGC</u>             | putative branched-chain amino<br>acid ABC transporter                     |
|      |                 |              | <u>GCCGCGCCGGGCGGACGGCCCCGGC</u> | ATP-binding protein                                                       |
|      |                 |              | <u>GCCGCTCCAAGAGGCAGGGTCGGC</u>  |                                                                           |
|      |                 |              | <u>ACCGAGCAGGC</u>               |                                                                           |
|      |                 |              | <u>GCCGCGTCCCGCGCGGAGCCCCGGC</u> |                                                                           |
|      |                 |              | <u>GCCGCGTCTCGGGACCGGC</u>       |                                                                           |
| 1293 | <i>sav_6223</i> | <i>livH3</i> | <u>GCCGCGCGGCTGGC</u>            | putative branched-chain amino<br>acid ABC transporter permease<br>protein |
| 1294 | <i>sav_6224</i> | <i>livK3</i> | <u>GCCGCTTGCC</u>                | putative branched-chain amino<br>acid ABC transporter                     |
|      |                 |              | <u>ACCGCGCCAGGC</u>              | substrate-binding protein                                                 |
|      |                 |              | <u>ACCGACCGCC</u>                |                                                                           |
|      |                 |              | <u>ACCGCGCCGCC</u>               |                                                                           |
| 1295 | <i>sav_5047</i> | <i>lldP</i>  | <u>GCCGACTACTCCAGGCCGCC</u>      | putative L-lactate permease                                               |
| 1296 | <i>sav_2577</i> | <i>lplA</i>  | <u>ACCGCTTCCGCTCAGCC</u>         | putative multiple sugar ABC<br>transporter substrate-binding<br>protein   |
|      |                 |              | <u>ACCGCAGCCGACGGCTCTCCGCC</u>   |                                                                           |
| 1297 | <i>sav_1456</i> | <i>lplB</i>  | <u>ACCGATAATTTCCGGC</u>          | putative multiple sugar ABC<br>transport permease protein                 |
| 1298 | <i>sav_5977</i> | <i>malE</i>  | <u>GCCGACAGTTACCCCGCC</u>        | putative maltose-binding<br>protein                                       |
|      |                 |              | <u>GCCGCTCCTGCCGGCTTGCC</u>      |                                                                           |
| 1299 | <i>sav_5979</i> | <i>malG</i>  | <u>GCCGACAGGAGCCGCC</u>          | putative maltose permease                                                 |
| 1300 | <i>sav_836</i>  | <i>matE</i>  | <u>GCCGAGATCAGAGGTAGATCGGC</u>   | putative efflux family protein                                            |
|      |                 |              | <u>GCCGATCTACCTCTGATCTCGGC</u>   |                                                                           |
|      |                 |              | <u>GCCGACTGCATCGACAAACCGGC</u>   |                                                                           |
| 1301 | <i>sav_5902</i> | <i>m1aF</i>  | <u>ACCGCCGAAAAGGCACTGCC</u>      | putative ABC transporter                                                  |
|      |                 |              | <u>GCCGCGGAGCTGCCGAAAACCGGC</u>  | ATP-binding protein                                                       |
| 1302 | <i>sav_4979</i> | <i>msmE</i>  | <u>ACCGATAATATCGGC</u>           | putative multiple sugar ABC<br>transporter substrate-binding<br>protein   |
| 1303 | <i>sav_1425</i> | <i>murI</i>  | <u>GCCGACAGTCTGCC</u>            | putative glutamate racemase                                               |
| 1304 | <i>sav_5119</i> | <i>narK</i>  | <u>ACCGCTGGAGCTCCGGC</u>         | putative nitrate extrusion<br>protein                                     |
| 1305 | <i>sav_2251</i> | <i>ngcE</i>  | <u>GCCGACTGTGTGTTGCC</u>         | putative ABC transporter<br>substrate-binding protein                     |

|      |                 |               |                                                                                                                                                                                                    |                                                                  |
|------|-----------------|---------------|----------------------------------------------------------------------------------------------------------------------------------------------------------------------------------------------------|------------------------------------------------------------------|
| 1306 | <i>sav_4598</i> | <i>nhaA</i>   | <u>ACCGACCCGGAGGTTCCCGCC</u><br><u>GCCGACCAGACTTCCCGGC</u>                                                                                                                                         | putative sodium/proton<br>antiporter                             |
| 1307 | <i>sav_560</i>  | <i>nicT1</i>  | <u>ACCGACTTCGTCCGGC</u><br><u>ACCGACGAGAGCCGCGCCGGC</u><br><u>GCCGATTCCGACGAGCAGGC</u><br><u>GCCGCGCAGCAGCC</u>                                                                                    | putative high-affinity<br>nickel-transport protein               |
| 1308 | <i>sav_2333</i> | <i>nicT2</i>  | <u>GCCGCTCCGGC</u>                                                                                                                                                                                 | putative high-affinity<br>nickel-transport protein               |
| 1309 | <i>sav_5941</i> | <i>oleC4</i>  | <u>GCCGCAGGAACGCGTGCTCCTCGGC</u><br><u>GCCGCGCACCCCTCAGGGGCCGGC</u><br><u>GCCGCCCCCGGTACGCCGGC</u><br><u>GCCGACTGGCGCCGACAGCCCGCC</u><br><u>ACCGACAAACCACCGACAGGC</u><br><u>GCCGCCAAGGTGTCAGCC</u> | putative ABC transporter<br>ATP-binding protein                  |
| 1310 | <i>sav_2768</i> | <i>oppA1</i>  | <u>ACCGCTCCCACGACTGCCGTAGCC</u>                                                                                                                                                                    | putative peptide ABC<br>transporter substrate-binding<br>protein |
| 1311 | <i>sav_3048</i> | <i>oppA2</i>  | <u>ACCGCGCATTCACCCCGCC</u>                                                                                                                                                                         | putative peptide ABC<br>transporter substrate-binding<br>protein |
| 1312 | <i>sav_5619</i> | <i>oppA8</i>  | <u>ACCGAACTTAGGTTAGGC</u><br><u>GCCGAACTCCTGCTGCC</u><br><u>GCCGCCCCGCC</u><br><u>GCCGCATCCCCCGCCGGC</u>                                                                                           | putative peptide ABC<br>transporter substrate-binding<br>protein |
| 1313 | <i>sav_2767</i> | <i>oppB1</i>  | <u>ACCGCTCCCACGACTGCCGTAGCC</u>                                                                                                                                                                    | putative peptide ABC<br>transporter permease protein             |
| 1314 | <i>sav_3047</i> | <i>oppB2</i>  | <u>GCCGCGCTCGGC</u>                                                                                                                                                                                | putative peptide ABC<br>transporter permease protein             |
| 1315 | <i>sav_5620</i> | <i>oppB8</i>  | <u>GCCGCCCCGCC</u><br><u>GCCGCGCTCGCC</u>                                                                                                                                                          | putative peptide ABC<br>transporter permease protein             |
| 1316 | <i>sav_2769</i> | <i>oppC1</i>  | <u>GCCGCGCCCCCTGGC</u><br><u>GCCGCATCATCTGCGGTCGCC</u><br><u>GCCGCAGACAGCGGCGGGCGTAGGC</u><br><u>ACCGCCGCCAGGGGCGCGCAGCC</u>                                                                       | putative peptide ABC<br>transporter permease protein             |
| 1317 | <i>sav_6715</i> | <i>opuAA</i>  | <u>ACCGACAGGCACCCCGCC</u>                                                                                                                                                                          | putative glycine betaine ABC<br>transport ATP-binding protein    |
| 1318 | <i>sav_3505</i> | <i>opuBA1</i> | <u>ACCGCCAGGC</u>                                                                                                                                                                                  | putative ABC transporter<br>ATP-binding protein                  |
| 1319 | <i>sav_2178</i> | <i>opuBC1</i> | <u>ACCGACCGAGAACCGGC</u><br><u>ACCGATTGGC</u>                                                                                                                                                      | putative ABC transporter<br>substrate-binding protein            |
| 1320 | <i>sav_6386</i> | <i>pbuG</i>   | <u>ACCGCCGGGTACGAGGAGTCTCGCC</u>                                                                                                                                                                   | putative hypoxanthine/guanine<br>permease                        |
| 1321 | <i>sav_3897</i> | <i>pbuG1</i>  | <u>ACCGCCGGAGCCGCC</u>                                                                                                                                                                             | putative hypoxanthine/guanine<br>permease                        |

|      |                 |              |                                                                |                                                                       |
|------|-----------------|--------------|----------------------------------------------------------------|-----------------------------------------------------------------------|
| 1322 | <i>sav_2016</i> | <i>pbuX2</i> | <u>GCCGAGGGGGACGGCCCTCGGC</u><br><u>GCCGAGGGCCGTCCCCCTCGGC</u> | putative xanthine/uracil<br>permease                                  |
| 1323 | <i>sav_2591</i> | <i>potD2</i> | <u>ACCGCCGGGTGGCACCACCGGC</u>                                  | putative polyamine ABC<br>transporter substrate-binding<br>protein    |
| 1324 | <i>sav_1125</i> | <i>potD3</i> | <u>GCCGCACCCAGCATCAAGGCCGCC</u>                                | putative polyamine ABC<br>transporter substrate-binding<br>protein    |
| 1325 | <i>sav_4075</i> | <i>pstB</i>  | <u>GCCGCGTCAGCGGCCCGCC</u>                                     | putative phosphate ABC<br>transporter ATP-binding<br>protein          |
| 1326 | <i>sav_4073</i> | <i>pstC</i>  | <u>GCCGCACCGTCCGGTGCACCGCC</u>                                 | putative phosphate ABC<br>transporter permease protein                |
| 1327 | <i>sav_4072</i> | <i>pstS</i>  | <u>GCCGCCACCAGTCGGC</u><br><u>ACCGCGTAAGGCCGAAATTAGGC</u>      | putative phosphate ABC<br>transporter substrate-binding<br>protein    |
| 1328 | <i>sav_6974</i> | <i>ptsP</i>  | <u>GCCGCCGTGATGATTGTCTGCC</u>                                  | putative<br>phosphoenolpyruvate-protein<br>phosphotransferase         |
| 1329 | <i>sav_7417</i> | <i>rhaP</i>  | <u>GCCGACAGCCGCCTGGAGGGCCGCC</u>                               | putative simple sugar ABC<br>transporter permease protein             |
| 1330 | <i>sav_5071</i> | <i>secA1</i> | <u>GCCGCTGACAGCC</u>                                           | putative preprotein translocase<br>SecA subunit                       |
| 1331 | <i>sav_4908</i> | <i>secE</i>  | <u>ACCGCATCCGCC</u>                                            | putative preprotein translocase<br>SecE subunit                       |
| 1332 | <i>sav_1560</i> | <i>ssuA2</i> | <u>GCCGCACACCCCACCCCTTCAGCC</u>                                | putative ABC transporter<br>substrate-binding protein                 |
| 1333 | <i>sav_3044</i> | <i>sugE</i>  | <u>ACCGCTTTTTCTGGC</u>                                         | putative SMR-type multi-drug<br>efflux transporter                    |
| 1334 | <i>sav_6692</i> | <i>tatA</i>  | <u>ACCGATCGGACAGCACCCCGCC</u><br><u>ACCGAATCCATAGAAGCCGGC</u>  | putative sec-independent<br>protein translocase protein<br>TatA       |
| 1335 | <i>sav_2391</i> | <i>trkA</i>  | <u>GCCGCCGCCGGACTCGTCGGC</u><br><u>GCCGACGAGTCCGGC</u>         | putative potassium transporter                                        |
| 1336 | <i>sav_2247</i> | <i>xylF</i>  | <u>GCCGAGTTGACTTCCAGCC</u>                                     | putative simple sugar ABC<br>transporter substrate-binding<br>protein |
| 1337 | <i>sav_2246</i> | <i>xylG</i>  | <u>ACCGCGTACGGGAATTCGCC</u><br><u>GCCGCCTGACCCGGC</u>          | putative simple sugar ABC<br>transporter ATP-binding<br>protein       |
| 1338 | <i>sav_6836</i> | <i>yajC</i>  | <u>GCCGATGCCGCC</u><br><u>GCCGCCCAACGGCGGCATCGGC</u>           | putative preprotein translocase<br>YajC subunit                       |
| 1339 | <i>sav_62</i>   |              | <u>ACCGCCGCCACCCCTCCGCC</u>                                    | putative transmembrane<br>transport protein                           |

|      |                 |                                                                                                                                                                                                                           |                                                           |
|------|-----------------|---------------------------------------------------------------------------------------------------------------------------------------------------------------------------------------------------------------------------|-----------------------------------------------------------|
| 1340 | <i>sav_92</i>   | <u>GCCGACGGGGCGAGCCCGGC</u><br><u>GCCGCCACCACCGCC</u><br><u>GCCGCGGTGGCCCGCC</u><br><u>GCCGCGGCGCTGAGGACAGTTCGGC</u><br><u>ACCGCCGTGCTCGCC</u><br><u>GCCGACGCCGGC</u><br><u>GCCGATCAGCCCGCC</u><br><u>ACCGCCGCGCCCGCC</u> | putative lipoprotein                                      |
| 1341 | <i>sav_133</i>  | <u>GCCGCTCGCC</u><br><u>ACCGCTGCCCGGTCGGTATCCGGC</u>                                                                                                                                                                      | putative transporter                                      |
| 1342 | <i>sav_145</i>  | <u>GCCGACTTTCGGACGGTCCTGCC</u>                                                                                                                                                                                            | putative membrane transport protein                       |
| 1343 | <i>sav_245</i>  | <u>GCCGCGGGGCTGGC</u><br><u>GCCGCGAGGGCCCGCTGCC</u>                                                                                                                                                                       | putative LysE-family efflux protein                       |
| 1344 | <i>sav_252</i>  | <u>ACCGCGGCACGACCCTGGCCCCGGC</u><br><u>ACCGCCGTACCCGCGCTGGC</u><br><u>GCCGACCAGGGCAACGACTTCGCC</u>                                                                                                                        | putative ABC transporter ATP-binding protein              |
| 1345 | <i>sav_257</i>  | <u>GCCGCCCTAGTCACCGTGACCGCC</u><br><u>GCCGATCTGCCCCAGGC</u><br><u>GCCGCCTGGGCGGCACCTGGC</u><br><u>GCCGCGCACGCCTGGGTTCGCC</u><br><u>GCCGCCCAGGC</u>                                                                        | putative ABC transporter ATP-binding protein              |
| 1346 | <i>sav_552</i>  | <u>GCCGCTCGGC</u><br><u>GCCGAAGGAGTACCGGC</u><br><u>GCCGAGCGGCAGGC</u>                                                                                                                                                    | putative transmembrane efflux protein                     |
| 1347 | <i>sav_695</i>  | <u>ACCGCCGGCGGTGGTGTTCGCC</u>                                                                                                                                                                                             | putative ABC transporter ATP-binding protein              |
| 1348 | <i>sav_794</i>  | <u>ACCGCTACGGCTAACCCCAGGC</u><br><u>GCCGCTGAACGATTCCCGGC</u>                                                                                                                                                              | putative amino acid transporter                           |
| 1349 | <i>sav_874</i>  | <u>GCCGCGGGGCCCGCC</u><br><u>GCCGAGGCAGCGGAACAGCC</u>                                                                                                                                                                     | putative solute-binding dependent transport lipoprotein   |
| 1350 | <i>sav_891</i>  | <u>ACCGATCGCC</u><br><u>ACCGCTCCTCGTTCGGC</u>                                                                                                                                                                             | putative quaternary amine transporter                     |
| 1351 | <i>sav_933</i>  | <u>ACCGCTCGACCATATCCAGGC</u><br><u>GCCGCTCCGCC</u><br><u>GCCGCTCCTCCTGCAGCC</u>                                                                                                                                           | putative ABC transporter ATP-binding protein              |
| 1352 | <i>sav_970</i>  | <u>ACCGACATCCACAGTCCCGCC</u><br><u>GCCGCACCGGC</u><br><u>GCCGCTGCCTGCC</u>                                                                                                                                                | putative simple sugar ABC transporter ATP-binding protein |
| 1353 | <i>sav_1078</i> | <u>GCCGCGCCCGGCCTCCCGCC</u><br><u>GCCGCAGCAGCC</u><br><u>GCCGCGGCGCCAGACAGGC</u>                                                                                                                                          | putative multiple sugar ABC transporter permease protein  |
| 1354 | <i>sav_1133</i> | <u>GCCGCCGGCGGCCCGGC</u>                                                                                                                                                                                                  | putative membrane transport protein                       |

|      |                 |                                                                                                     |                                                                         |
|------|-----------------|-----------------------------------------------------------------------------------------------------|-------------------------------------------------------------------------|
| 1355 | <i>sav_1159</i> | <u>GCCGATCAGGC</u>                                                                                  | putative ABC transporter<br>ATP-binding protein                         |
| 1356 | <i>sav_1162</i> | <u>ACCGCAGATTCCGGC</u>                                                                              | putative ion channel subunit                                            |
| 1357 | <i>sav_1221</i> | <u>GCCGAGGGGAGCCCGGCGCCGGC</u><br><u>GCCGCCCTTGATCCGCCGGCCGGC</u><br><u>GCCGACGTCGATCGGCGGCCGGC</u> | putative amino acid permease                                            |
| 1358 | <i>sav_1337</i> | <u>ACCGCATGTCTTCGGC</u><br><u>GCCGAAACCATAACCCAGGC</u>                                              | putative ABC transporter<br>substrate-binding protein                   |
| 1359 | <i>sav_1342</i> | <u>ACCGCAGACTGCATGTGGATCTGGC</u>                                                                    | putative transmembrane efflux<br>protein                                |
| 1360 | <i>sav_1418</i> | <u>ACCGCCATTCCCGCATCGCTCGGC</u>                                                                     | putative transporter                                                    |
| 1361 | <i>sav_1558</i> | <u>GCCGCATGTTGCGTTCAGCC</u><br><u>GCCGCGTGTCGGC</u><br><u>ACCGATATTCGGC</u>                         | putative ABC transporter<br>permease protein                            |
| 1362 | <i>sav_1569</i> | <u>GCCGAACCTTGCC</u><br><u>GCCGACAGGGCCAGTCCAGCC</u>                                                | putative ABC transporter<br>permease protein                            |
| 1363 | <i>sav_1614</i> | <u>GCCGCACGAGCCGCGACGGCCCGCC</u>                                                                    | putative benzoate transporter<br>protein                                |
| 1364 | <i>sav_1727</i> | <u>ACCGTCCTGCC</u><br><u>ACCGTCCTGCC</u><br><u>ACCGACGACATCGGC</u>                                  | putative multiple sugar ABC<br>transporter substrate-binding<br>protein |
| 1365 | <i>sav_1737</i> | <u>ACCGTCACCCCTGCC</u>                                                                              | putative multiple sugar ABC<br>transporter substrate-binding<br>protein |
| 1366 | <i>sav_1779</i> | <u>ACCGCGGCGCCGCGCCCGGC</u><br><u>GCCGCGCCGGGTGCGTGCCCGGC</u>                                       | putative 3-(2-hydroxyphenyl)<br>propionic acid transporter              |
| 1367 | <i>sav_1878</i> | <u>GCCGCGACACGAAACGAGTTTGCC</u><br><u>GCCGCCTCCGCCCGGGCCGGC</u>                                     | putative ABC transporter<br>ATP-binding protein                         |
| 1368 | <i>sav_1947</i> | <u>GCCGACAGTTGACGTTTACCGGC</u>                                                                      | putative<br>cytosine/uracil/thiamine/allanto<br>in permease             |
| 1369 | <i>sav_2066</i> | <u>GCCGCAACGGCGGTTGACCTCAGCC</u>                                                                    | putative xanthine/uracil<br>permease                                    |
| 1370 | <i>sav_2092</i> | <u>ACCGAAGGTTAGCGTCCGGC</u><br><u>GCCGCCGCACGACCGGACCGCC</u>                                        | putative multiple sugar ABC<br>transporter substrate-binding<br>protein |
| 1371 | <i>sav_2134</i> | <u>GCCGACCTCCCGGC</u>                                                                               | putative ABC transporter<br>substrate-binding protein                   |
| 1372 | <i>sav_2145</i> | <u>GCCGACCGGC</u>                                                                                   | putative ABC transporter<br>permease protein                            |
| 1373 | <i>sav_2185</i> | <u>GCCGAAAAACGGGTCTTCTGCC</u><br><u>GCCGAATACCCTTCGGGTTTGCC</u>                                     | putative ABC transporter<br>ATP-binding protein                         |
| 1374 | <i>sav_2187</i> | <u>GCCGCCGCTCACTTGACTGCC</u><br><u>ACCGCGCCGACATCAGCCGCC</u>                                        | putative ABC transporter<br>substrate-binding protein                   |

|      |                 |                                  |                                                                         |
|------|-----------------|----------------------------------|-------------------------------------------------------------------------|
|      |                 | <u>GCCGAGGGTCTGGC</u>            |                                                                         |
| 1375 | <i>sav_2293</i> | <u>GCCGCGGGTGCCGCAACAGCC</u>     | putative amino acid permease                                            |
| 1376 | <i>sav_2297</i> | <u>ACCGCACCACCGTCACCACAGCC</u>   | putative sugar transporter                                              |
|      |                 | <u>ACCGCCCGGGGCTCCGGC</u>        |                                                                         |
| 1377 | <i>sav_2328</i> | <u>ACCGCTGACGGCCGTCCGCC</u>      | putative bldA-regulated<br>nucleotide binding protein                   |
| 1378 | <i>sav_2365</i> | <u>GCCGACGGCCAGCAGGCCGGC</u>     | putative ABC transporter                                                |
|      |                 | <u>GCCGAGTGGGTCCGCC</u>          | ATP-binding protein                                                     |
|      |                 | <u>GCCGCAATGTCGCTGCCGGC</u>      |                                                                         |
| 1379 | <i>sav_2390</i> | <u>GCCGACGAGTCCGGC</u>           | putative amino acid permease                                            |
|      |                 | <u>GCCGCCGCCGGACTCGTCGGC</u>     |                                                                         |
| 1380 | <i>sav_2455</i> | <u>GCCGACCGCC</u>                | putative transmembrane efflux<br>protein                                |
| 1381 | <i>sav_2466</i> | <u>ACCGATCCCGCCTCACGCTCCGGC</u>  | putative siderophore<br>biosynthesis protein/iron<br>transport protein  |
| 1382 | <i>sav_2606</i> | <u>GCCGCGGCCGGC</u>              | putative sulfate transporter                                            |
|      |                 | <u>ACCGCAGAACCCACCTCTCGCC</u>    |                                                                         |
| 1383 | <i>sav_2609</i> | <u>GCCGACGACGTCAGCCGGCCGGC</u>   | putative ABC transporter                                                |
|      |                 | <u>ACCGCCTGACCGCCGACCGGC</u>     | substrate-binding protein                                               |
|      |                 | <u>GCCGACGGCACCGGC</u>           |                                                                         |
| 1384 | <i>sav_2613</i> | <u>GCCGCGTGCTGTCCGGC</u>         | putative ABC transporter                                                |
|      |                 | <u>ACCGATCGGCCCTGCC</u>          | ATP-binding protein                                                     |
|      |                 | <u>GCCGATCGGTCACTTGGC</u>        |                                                                         |
| 1385 | <i>sav_2655</i> | <u>GCCGAGCTTGCGCGTTCGGCC</u>     | putative allantoin<br>permease-family protein                           |
| 1386 | <i>sav_2728</i> | <u>GCCGCCGTGAATGGACCGCC</u>      | putative transmembrane efflux<br>protein                                |
| 1387 | <i>sav_2790</i> | <u>GCCGACGGGTGAACGGCGTCGGC</u>   | putative ABC transporter                                                |
|      |                 | <u>GCCGACGCCGTTACCCGTCGGC</u>    | ATP-binding protein                                                     |
| 1388 | <i>sav_2813</i> | <u>GCCGCGAGGCAGGC</u>            | putative transmembrane efflux<br>protein                                |
| 1389 | <i>sav_2818</i> | <u>GCCGCGTCGTCGTGCTTCCGGC</u>    | putative multiple sugar ABC<br>transporter substrate-binding<br>protein |
|      |                 | <u>GCCGCGTACCCCGCGGGGTCCGGC</u>  |                                                                         |
| 1390 | <i>sav_2860</i> | <u>ACCGCGCTCATCGAGCGCACCGGC</u>  | putative ABC transporter<br>ATP-binding protein                         |
| 1391 | <i>sav_3135</i> | <u>ACCGACGACAGGTGGCACTGCC</u>    | putative ABC transporter<br>ATP-binding protein                         |
| 1392 | <i>sav_3253</i> | <u>ACCGAAGCCCCAGCCCCGCC</u>      | putative type II secretion<br>system protein E                          |
|      |                 | <u>ACCGAAGCCCCAGCC</u>           |                                                                         |
| 1393 | <i>sav_3321</i> | <u>ACCGCCCCCTGAGGGCGGTGCCGCC</u> | putative ABC transporter                                                |
|      |                 | <u>ACCGCCCTCAGGGGCGGTGCCGCC</u>  | permease protein                                                        |
| 1394 | <i>sav_3369</i> | <u>ACCGCGTTCGAGCTGGC</u>         | putative simple sugar ABC                                               |

|      |                 |                                                                                            |                                                  |
|------|-----------------|--------------------------------------------------------------------------------------------|--------------------------------------------------|
|      |                 |                                                                                            | transporter ATP-binding protein                  |
| 1395 | <i>sav_3551</i> | <u>ACCGCAGGTCGTCCGCTGACCGGC</u><br><u>ACCGACATAGGAGAGTTGCC</u><br><u>ACCGCATAAAGCCAGGC</u> | putative ABC transporter ATP-binding protein     |
| 1396 | <i>sav_3552</i> | <u>ACCGCATAAAGCCAGGC</u><br><u>ACCGACATAGGAGAGTTGCC</u><br><u>ACCGCAGGTCGTCCGCTGACCGGC</u> | putative integral membrane transport protein     |
| 1397 | <i>sav_3584</i> | <u>GCCGCCCGGC</u>                                                                          | putative ABC transporter ATP-binding protein     |
| 1398 | <i>sav_3634</i> | <u>GCCGACGCAGCGCCTTATCCGGC</u>                                                             | putative ABC transporter ATP-binding protein     |
| 1399 | <i>sav_3677</i> | <u>GCCGCCCGCCTGTCTGGGCAGGC</u>                                                             | putative ABC transporter permease protein        |
| 1400 | <i>sav_3698</i> | <u>GCCGATGACCAGCC</u><br><u>GCCGA ACTCATCGGC</u>                                           | putative transmembrane efflux protein            |
| 1401 | <i>sav_3787</i> | <u>GCCGCCCTGCC</u>                                                                         | putative sodium-coupled permease                 |
| 1402 | <i>sav_3852</i> | <u>GCCGCAGGATGTCCCGGC</u>                                                                  | putative ABC transporter ATP-binding protein     |
| 1403 | <i>sav_3872</i> | <u>GCCGCCTCCCGTAATTCCGGC</u><br><u>GCCGCGGCTCGCC</u>                                       | putative ABC transporter ATP-binding protein     |
| 1404 | <i>sav_3887</i> | <u>GCCGACACGGCACAACCCGGC</u>                                                               | putative transmembrane efflux protein            |
| 1405 | <i>sav_3894</i> | <u>ACCGCCCCACCTGCAACTGCC</u>                                                               | putative integral membrane efflux protein        |
| 1406 | <i>sav_3978</i> | <u>GCCGCAGACCGCTCGCGGCCCGGC</u>                                                            | putative integral membrane transport protein     |
| 1407 | <i>sav_4052</i> | <u>GCCGCCCGCCGCCCGCCCGCC</u>                                                               | putative ABC transporter permease protein        |
| 1408 | <i>sav_4053</i> | <u>GCCGAGGCGGGGCCGCC</u>                                                                   | putative ABC transporter ATP-binding protein     |
| 1409 | <i>sav_4059</i> | <u>ACCGCGAGCGCCCGCC</u>                                                                    | putative ABC transporter permease protein        |
| 1410 | <i>sav_4122</i> | <u>ACCGATTGGC</u>                                                                          | putative amino acid permease                     |
| 1411 | <i>sav_4142</i> | <u>ACCGATCGGC</u>                                                                          | putative ABC transporter ATP-binding protein     |
| 1412 | <i>sav_4194</i> | <u>ACCGCCTCGACCGCC</u>                                                                     | putative transmembrane efflux protein            |
| 1413 | <i>sav_4203</i> | <u>ACCGCGCTCTGCC</u>                                                                       | putative peptidoglycan-binding protein, secreted |
| 1414 | <i>sav_4250</i> | <u>GCCGCTGCCCGCC</u>                                                                       | putative ABC transporter ATP-binding protein     |
| 1415 | <i>sav_4280</i> | <u>ACCGCGTTTGCATATAGCC</u>                                                                 | putative transmembrane efflux                    |



|      |                 |                                                                                                                            |                                                                                            |
|------|-----------------|----------------------------------------------------------------------------------------------------------------------------|--------------------------------------------------------------------------------------------|
| 1416 | <i>sav_4439</i> | <u>GCCGCAGGAGCCCCCTGTCGGC</u>                                                                                              | protein                                                                                    |
| 1417 | <i>sav_4488</i> | <u>GCCGCGTCGGCCGGC</u><br><u>GCCGCGTTGGCTTTCAGCC</u>                                                                       | putative permease<br>putative simple sugar ABC<br>transporter substrate-binding<br>protein |
| 1418 | <i>sav_4541</i> | <u>GCCGCGCCCCGTGTCGTGTCCGGC</u><br><u>ACCGCTTCCGCGTCCCGTCCGGC</u><br><u>GCCGCGTCGGC</u><br><u>GCCGCGCAGCTCGTCGAGGCAGGC</u> | putative ABC transporter<br>ATP-binding protein                                            |
| 1419 | <i>sav_4543</i> | <u>GCCGCCCCGGC</u>                                                                                                         | putative amino acid permease                                                               |
| 1420 | <i>sav_4586</i> | <u>ACCGACTGTAGCC</u><br><u>GCCGCGCACAGACTGGTTAGGC</u>                                                                      | putative ion-transporting<br>ATPase                                                        |
| 1421 | <i>sav_4702</i> | <u>GCCGACCGGC</u><br><u>GCCGCTGACCGTGCCGGCCTCTGCC</u>                                                                      | putative transmembrane efflux<br>protein                                                   |
| 1422 | <i>sav_4721</i> | <u>GCCGAGCCCTCCCCGGTTCGGC</u>                                                                                              | putative transmembrane sulfate<br>transport protein                                        |
| 1423 | <i>sav_4722</i> | <u>GCCGAACCGGGGGAGGGCTCGGC</u>                                                                                             | putative ABC transporter<br>ATP-binding protein                                            |
| 1424 | <i>sav_4769</i> | <u>GCCGCTCGGCATGCCGGC</u><br><u>ACCGCCTCGATGCCCCGCTGCC</u><br><u>GCCGAAAGAGGTCTGGTGCCGGC</u>                               | putative amino acid transporter                                                            |
| 1425 | <i>sav_4774</i> | <u>ACCGCCGACTGCC</u><br><u>ACCGACAGGTCGCTACCGACAGCC</u><br><u>GCCGATTCGACCGCC</u>                                          | putative amino acid permease                                                               |
| 1426 | <i>sav_4867</i> | <u>GCCGCGTCGGGCTCGGC</u>                                                                                                   | putative ABC transporter<br>ATP-binding protein                                            |
| 1427 | <i>sav_4894</i> | <u>GCCGCGTTCATGTGCCGCC</u><br><u>GCCGACGGCTGCC</u>                                                                         | putative amino acid transporter                                                            |
| 1428 | <i>sav_4904</i> | <u>ACCGCTTCCGCAGCC</u>                                                                                                     | putative transmembrane efflux<br>protein                                                   |
| 1429 | <i>sav_5097</i> | <u>ACCGCCGCCGGTCTCCTCCGCCGCC</u>                                                                                           | putative multiple sugar ABC<br>transporter permease protein                                |
| 1430 | <i>sav_5098</i> | <u>GCCGCCCCCGTCCGCC</u>                                                                                                    | putative multiple sugar ABC<br>transporter substrate-binding<br>protein                    |
| 1431 | <i>sav_5161</i> | <u>ACCGAGCCGGCGGATCGCCGGC</u>                                                                                              | putative proline permease                                                                  |
| 1432 | <i>sav_5299</i> | <u>ACCGCCGGCCCCGGC</u><br><u>GCCGCCGGGTCCGCC</u><br><u>GCCGCCGCCGGGGCCGGC</u>                                              | putative ABC transporter<br>ATP-binding protein                                            |
| 1433 | <i>sav_5344</i> | <u>ACCGCCCGAACGACGTCGCC</u><br><u>GCCGCCACCGACAAGCGATGCAGCC</u>                                                            | putative ABC transporter<br>ATP-binding protein                                            |
| 1434 | <i>sav_5367</i> | <u>GCCGAGCGCCCTCGCCGGC</u><br><u>GCCGACCGCC</u>                                                                            | putative ABC transporter<br>ATP-binding protein                                            |
| 1435 | <i>sav_5578</i> | <u>GCCGCCACCGAGCC</u><br><u>ACCGCGTGCTTGATACAAATTGCC</u>                                                                   | putative transmembrane efflux<br>protein                                                   |

|      |                 |                                                                                                                                        |                                                  |
|------|-----------------|----------------------------------------------------------------------------------------------------------------------------------------|--------------------------------------------------|
| 1436 | <i>sav_5587</i> | <u>ACCGCCAGGCACCGCC</u>                                                                                                                | putative transmembrane efflux protein            |
| 1437 | <i>sav_5646</i> | <u>ACCGCCGTCGCCCCACCGCC</u><br><u>GCCGCCCCGCC</u>                                                                                      | putative transmembrane efflux protein            |
| 1438 | <i>sav_5648</i> | <u>GCCGCGAGGCGCCCCGCC</u>                                                                                                              | putative efflux membrane protein                 |
| 1439 | <i>sav_5839</i> | <u>GCCGCTTCCAGCC</u><br><u>ACCGCCCCGCC</u><br><u>ACCGCGCTCTGCGTTCGCC</u><br><u>ACCGACCCCTGTGAGGGACGCAGGC</u><br><u>GCCGCTTCGCCAGGC</u> | putative integral membrane transport protein     |
| 1440 | <i>sav_5867</i> | <u>GCCGCAGCCGTACATCGGC</u>                                                                                                             | putative transmembrane efflux protein            |
| 1441 | <i>sav_5961</i> | <u>ACCGCCGTCGCC</u>                                                                                                                    | putative ABC transporter ATP-binding protein     |
| 1442 | <i>sav_6040</i> | <u>GCCGCGCCCCGCC</u>                                                                                                                   | putative cation/multidrug efflux protein         |
| 1443 | <i>sav_6065</i> | <u>GCCGATCCGGC</u>                                                                                                                     | putative transporter                             |
| 1444 | <i>sav_6072</i> | <u>GCCGCGCCCCCGGCCCGCC</u>                                                                                                             | putative ion transporting ATPase                 |
| 1445 | <i>sav_6162</i> | <u>ACCGCTTCCCGTGACCGCC</u><br><u>ACCGCCGGTCCACGCCGCGCC</u>                                                                             | putative integral membrane efflux protein        |
| 1446 | <i>sav_6276</i> | <u>GCCGACGCCCGGGATCTGGC</u>                                                                                                            | putative integral membrane export protein        |
| 1447 | <i>sav_6300</i> | <u>GCCGCGAAGCGAGTCGGC</u>                                                                                                              | putative electron transport protein              |
| 1448 | <i>sav_6303</i> | <u>GCCGAGCGCACACCGGC</u><br><u>GCCGCGGCACCGGC</u><br><u>ACCGACCGGGCACCGGC</u><br><u>GCCGCCTCAGCCTCTCGGC</u>                            | putative ABC transporter permease protein        |
| 1449 | <i>sav_6322</i> | <u>ACCGAGGCCGTCGGC</u>                                                                                                                 | putative ABC transporter ATP-binding protein     |
| 1450 | <i>sav_6353</i> | <u>ACCGCGGCGCGGGTTTCCGCC</u>                                                                                                           | putative transport associated protein            |
| 1451 | <i>sav_6458</i> | <u>GCCGCCTCTGCGCCGCC</u><br><u>ACCGCGTACGGCTCTGCC</u>                                                                                  | putative transglycosylase associated protein     |
| 1452 | <i>sav_6480</i> | <u>ACCGACCGATGGATGGGACCGCC</u>                                                                                                         | putative ABC transporter ATP-binding protein     |
| 1453 | <i>sav_6527</i> | <u>ACCGCCCTCTCTAGATTGCTCCGCC</u><br><u>ACCGCTCGGGTACGTCCGCCGGC</u>                                                                     | putative peptidoglycan-binding protein, secreted |
| 1454 | <i>sav_6528</i> | <u>GCCGACCGGGTGGGACCCCGGC</u>                                                                                                          | putative peptidoglycan-binding protein           |
| 1455 | <i>sav_6530</i> | <u>GCCGACGGGGCCGCC</u>                                                                                                                 | putative ABC transporter ATP-binding protein     |

|                        |                 |              |                                                                                                                          |                                                                   |
|------------------------|-----------------|--------------|--------------------------------------------------------------------------------------------------------------------------|-------------------------------------------------------------------|
| 1456                   | <i>sav_6592</i> |              | <u>ACCGAACGGCCCCGGCAGGGGCTGGC</u>                                                                                        | putative integral membrane transport protein                      |
| 1457                   | <i>sav_6623</i> |              | <u>GCCGCCGGCCGTCGGC</u><br><u>GCCGAGACATCAGCC</u><br><u>GCCGACGGCCGGC</u><br><u>GCCGATGTCTCGGC</u>                       | putative amino acid permease                                      |
| 1458                   | <i>sav_6657</i> |              | <u>GCCGACGTTCGCC</u><br><u>GCCGCGACAGAGGTCGCCGGC</u>                                                                     | putative simple sugar ABC transporter substrate-binding protein   |
| 1459                   | <i>sav_6711</i> |              | <u>GCCGCACCTCGGTCGCC</u>                                                                                                 | putative ABC transporter ATP-binding protein                      |
| 1460                   | <i>sav_6812</i> |              | <u>GCCGCCGCTCCCGCC</u>                                                                                                   | putative multiple sugar ABC transporter substrate-binding protein |
| 1461                   | <i>sav_6886</i> |              | <u>GCCGCCGGTCCCCGCCGCC</u><br><u>ACCGAGCGGGGTCTCGCC</u>                                                                  | putative amino acid permease                                      |
| 1462                   | <i>sav_6900</i> |              | <u>GCCGCTGTGCCGCC</u>                                                                                                    | putative integral membrane transport protein                      |
| 1463                   | <i>sav_7032</i> |              | <u>ACCGCATGTTACCCACGAGTAGCC</u>                                                                                          | putative transmembrane efflux protein                             |
| 1464                   | <i>sav_7043</i> |              | <u>ACCGCTCCACTCCCCGCCGGC</u>                                                                                             | putative cation efflux system protein                             |
| 1465                   | <i>sav_7052</i> |              | <u>ACCGCACGCGCGGTGCGGCAGCC</u><br><u>GCCGCCGCGCCGTCCGGTCCGCC</u><br><u>ACCGCATACTGCTGGC</u><br><u>GCCGCCCGCACCCCCGCC</u> | putative amino acid transporter                                   |
| 1466                   | <i>sav_7234</i> |              | <u>GCCGCTGAGCCGTCCCACCGCC</u><br><u>GCCGCCCGCGCCCCGCCGGC</u>                                                             | putative multidrug efflux protein                                 |
| 1467                   | <i>sav_7281</i> |              | <u>GCCGCTCTCGCC</u>                                                                                                      | putative sugar ABC transporter permease protein                   |
| 1468                   | <i>sav_7294</i> |              | <u>GCCGATTGCC</u><br><u>GCCGCGTCCGGC</u>                                                                                 | putative amino acid transporter protein                           |
| 1469                   | <i>sav_7464</i> |              | <u>GCCGCCTTCCCCCGTCCGGC</u>                                                                                              | putative transport protein                                        |
| <b>Gas vesicle (6)</b> |                 |              |                                                                                                                          |                                                                   |
| 1470                   | <i>sav_598</i>  | <i>gvpA1</i> | <u>GCCGCGCCGGC</u><br><u>GCCGCCGGCGCGGCCCGTCCGGC</u>                                                                     | putative gas vesicle synthesis protein                            |
| 1471                   | <i>sav_1889</i> | <i>gvpA2</i> | <u>ACCGCGTCCCCGCC</u>                                                                                                    | putative gas vesicle synthesis protein                            |
| 1472                   | <i>sav_1887</i> | <i>gvpG2</i> | <u>GCCGCCGGTGCCCGGC</u>                                                                                                  | putative gas vesicle synthesis protein                            |
| 1473                   | <i>sav_599</i>  | <i>gvpO1</i> | <u>ACCGCGGCGTGCCGACTCTCGCC</u><br><u>GCCGCGGCACGGCACTGGC</u><br><u>ACCGCCGCCTCCCCCTCGCC</u><br><u>GCCGATCCATCCCGCC</u>   | putative gas vesicle synthesis protein                            |

|                                                           |                              |                                                                                                                                                                                  |                                                 |
|-----------------------------------------------------------|------------------------------|----------------------------------------------------------------------------------------------------------------------------------------------------------------------------------|-------------------------------------------------|
|                                                           |                              | <u>GCCGCGGTGAACTGCGCTGACAGGC</u>                                                                                                                                                 |                                                 |
|                                                           |                              | <u>GCCGCGGCGGGCGAGAGTCGGC</u>                                                                                                                                                    |                                                 |
| 1474                                                      | <i>sav_1890</i> <i>gvpO2</i> | <u>ACCGCGCAATGCGCGGAACCGGC</u>                                                                                                                                                   | putative gas vesicle synthesis protein          |
| 1475                                                      | <i>sav_2356</i> <i>gvpO3</i> | <u>GCCGCCTGGCTGCC</u><br><u>GCCGCGCCCCGAGCC</u>                                                                                                                                  | putative gas vesicle synthesis protein          |
| <b>Mobile and extrachromosomal element functions (56)</b> |                              |                                                                                                                                                                                  |                                                 |
| 1476                                                      | <i>sav_43</i>                | <u>GCCGCCCTCGCTGGC</u><br><u>GCCGAGCCCCCTGTTCGCC</u><br><u>ACCGCTGCACCTTCTGTCCCGGC</u><br><u>ACCGCGCGGGGACCAGGC</u>                                                              | putative IS5 family IS4811-like transposase     |
| 1477                                                      | <i>sav_46</i>                | <u>GCCGATTCGCC</u>                                                                                                                                                               | putative IS5 family IS1421-like transposase     |
| 1478                                                      | <i>sav_47</i>                | <u>GCCGATTCGCC</u>                                                                                                                                                               | putative IS605 family IS1136A-like transposase  |
| 1479                                                      | <i>sav_61</i>                | <u>GCCGCCACCCCTCCGCCCCAGCC</u>                                                                                                                                                   | putative IS605 family IS1136A0-like transposase |
| 1480                                                      | <i>sav_66</i>                | <u>GCCGCCGACCACGACCGGC</u><br><u>GCCGACGCTGAACTACACCGGC</u><br><u>GCCGAACCCTCCTCGGC</u><br><u>GCCGAGGAGGGTTTCGGCCGGC</u>                                                         | putative IS605 family IS1136A0-like transposase |
| 1481                                                      | <i>sav_78</i>                | <u>GCCGCGTCGGGCGGGACTTCGGC</u><br><u>GCCGCCACGGCGCCAGCC</u><br><u>ACCGCGAGCGTGATCAGCTCGGC</u><br><u>GCCGAAGTCCCGCC</u><br><u>GCCGCTTGTTGTAGCC</u>                                | putative IS982 family IScef3-like transposase   |
| 1482                                                      | <i>sav_103</i>               | <u>GCCGCGGATCGGGATCGGC</u><br><u>ACCGCCGGCCCCGGACCCGCCGGC</u><br><u>GCCGCCGTGACCGGC</u><br><u>GCCGAAAACCTGCGTGGCCGGC</u>                                                         | putative IS256 family IS1245-like transposase   |
| 1483                                                      | <i>sav_118</i>               | <u>ACCGCCGGGCCACCTCTCCGTCGCC</u><br><u>GCCGATCCCGCTCCTCGGC</u><br><u>GCCGAGGAGCGGGATCGGC</u>                                                                                     | putative IS5 family IS1647-like transposase     |
| 1484                                                      | <i>sav_207</i>               | <u>GCCGCGACACACCGCGGATCCGGC</u><br><u>GCCGCCAACGCTCAGCGCGCAGCC</u><br><u>GCCGATGCCGCGTAGGC</u>                                                                                   | putative Tn3 family transposase                 |
| 1485                                                      | <i>sav_227</i>               | <u>GCCGCCTTTCGGCTCCAGCC</u><br><u>GCCGACCAGGAGTCCCCACCTGGC</u>                                                                                                                   | putative IS701 family ISMmq4-like transposase   |
| 1486                                                      | <i>sav_229</i>               | <u>GCCGACCTACGTCGGC</u><br><u>GCCGCGACTTTCGGCACATCCGCC</u><br><u>GCCGCCTGTCCGGC</u><br><u>ACCGAAACACTCCCGCCCCGGC</u><br><u>GCCGAAAGAACACCCGGC</u><br><u>ACCGCGAAAACACCATCGGC</u> | putative transposase                            |

|      |                |                                  |                                             |
|------|----------------|----------------------------------|---------------------------------------------|
|      |                | <u>GCCGCAGTTGGGTGTAGGC</u>       |                                             |
|      |                | <u>GCCGACGTAGGTCGGCTGCC</u>      |                                             |
| 1487 | <i>sav_254</i> | <u>GCCGAGGCGGTCGCCCGGGCAGCC</u>  | putative IS5 family                         |
|      |                | <u>GCCGCCGTATCGCC</u>            | ISFa13B-like transposase                    |
|      |                | <u>ACCGCCTCGGCTCGGGTGCAGGC</u>   |                                             |
|      |                | <u>GCCGCTGGTCCACTGGC</u>         |                                             |
| 1488 | <i>sav_256</i> | <u>ACCGACGGGGTAGGC</u>           | putative ISAs1 family                       |
|      |                | <u>GCCGCCCTGCCCGCC</u>           | IS1629-like transposase                     |
|      |                | <u>GCCGACCACTCCGCAGTCCTGCC</u>   |                                             |
| 1489 | <i>sav_260</i> | <u>ACCGAGTGAGTCTCCTCACCGGC</u>   | putative transposase                        |
| 1490 | <i>sav_274</i> | <u>GCCGCCGCCGAGGCGTTCGTTCGGC</u> | putative IS630 family                       |
|      |                | <u>GCCGACGAACGCCTCGGC</u>        | transposase                                 |
|      |                | <u>ACCGCCGGCGTTCGCC</u>          |                                             |
| 1491 | <i>sav_291</i> | <u>GCCGAACAGCC</u>               | putative IS30 family                        |
|      |                | <u>GCCGCAGCCAGGC</u>             | ISLxx5-like transposase                     |
|      |                | <u>ACCGCATCTACGACGAAGCCCGCC</u>  |                                             |
|      |                | <u>GCCGCATCTCTGCC</u>            |                                             |
|      |                | <u>ACCGCCTGGCTGCGGCAGCC</u>      |                                             |
|      |                | <u>ACCGCCCTGGC</u>               |                                             |
| 1492 | <i>sav_300</i> | <u>GCCGCATAGGTGCTGCC</u>         | putative IS256 family                       |
|      |                | <u>ACCGACGCCCTGCCGGCAGCC</u>     | IS1164-like transposase                     |
| 1493 | <i>sav_303</i> | <u>GCCGCTCTTCGGGGCTGGC</u>       | putative IS110 family                       |
|      |                | <u>ACCGCGGACGGACACCGGACCGGC</u>  | IS1547-like transposase                     |
|      |                | <u>GCCGACTTCCGGAACCAACCGGC</u>   |                                             |
| 1494 | <i>sav_309</i> | <u>ACCGAACATCGCGTTCGTTCGCC</u>   | putative IS3 family                         |
|      |                | <u>GCCGAACCTTGGC</u>             | ISVisp1-like transposase                    |
|      |                | <u>GCCGCGGTACGCGCCACCGCC</u>     |                                             |
|      |                | <u>GCCGAGGTCCGACACCGGC</u>       |                                             |
|      |                | <u>GCCGATGGTAGGGGGTAGTGCCGGC</u> |                                             |
| 1495 | <i>sav_310</i> | <u>GCCGCGACTGGC</u>              | putative IS5 family IS1373-like transposase |
| 1496 | <i>sav_312</i> | <u>GCCGCGTTGGTCAGGTAGTCCGCC</u>  | putative IS4 family ISFsp5-like transposase |
|      |                | <u>ACCGAATTCCCTTGGC</u>          |                                             |
| 1497 | <i>sav_364</i> | <u>GCCGAGGCAGACAAGGGTGACCGGC</u> | putative IS110 family                       |
|      |                |                                  | ISLxx2-like transposase                     |
| 1498 | <i>sav_365</i> | <u>GCCGAGGCAGACAAGGGTGACCGGC</u> | putative IS4 family ISFsp6-like transposase |
| 1499 | <i>sav_375</i> | <u>GCCGCTTTTCGGC</u>             | putative IS605 family                       |
|      |                |                                  | IS606-like transposase                      |
| 1500 | <i>sav_378</i> | <u>GCCGCGTTTGGC</u>              | putative IS5 family                         |
|      |                | <u>GCCGCCCGGCCCGCAGTCAGGC</u>    | ISFa13A-like transposase                    |
| 1501 | <i>sav_420</i> | <u>GCCGAGAATCACTACCGACCTCGCC</u> | putative Tn3 family ISXc5-like transposase  |
|      |                | <u>GCCGACCCAGCC</u>              |                                             |
| 1502 | <i>sav_423</i> | <u>GCCGCCGACGAGCCCGCC</u>        | putative IS30 family                        |

|      |                 |                                                                                                                                                                                                                                                                                            |                                                                            |
|------|-----------------|--------------------------------------------------------------------------------------------------------------------------------------------------------------------------------------------------------------------------------------------------------------------------------------------|----------------------------------------------------------------------------|
| 1503 | <i>sav_441</i>  | <u>GCCGAAGAACAGGC</u><br><u>GCCGCTGTTCTGCGGC</u>                                                                                                                                                                                                                                           | ISCmi3-like transposase<br>putative ISL3 family<br>IS466A-like transposase |
| 1504 | <i>sav_446</i>  | <u>ACCGCGTAGGTTGCGC</u>                                                                                                                                                                                                                                                                    | putative IS21 family<br>IS1474-like transposase                            |
| 1505 | <i>sav_447</i>  | <u>ACCGCGTAGGTTGCGC</u>                                                                                                                                                                                                                                                                    | putative IS630 family<br>ISMma10-like transposase                          |
| 1506 | <i>sav_470</i>  | <u>ACCGCGTTTTCTCACAGGC</u>                                                                                                                                                                                                                                                                 | putative IS5 family IS493-like<br>transposase                              |
| 1507 | <i>sav_473</i>  | <u>GCCGCGAATGAACCTGGC</u>                                                                                                                                                                                                                                                                  | putative ISL3 family<br>IS469-like transposase                             |
| 1508 | <i>sav_509</i>  | <u>GCCGCACCGCC</u>                                                                                                                                                                                                                                                                         | putative IS5 family ISSco3-like<br>transposase                             |
| 1509 | <i>sav_523</i>  | <u>GCCGCCGTGCACGACGAGCTCGCC</u><br><u>GCCGACGGCAGCTGGC</u><br><u>GCCGCCGCACGCAGTCCGGC</u><br><u>GCCGCCGGGGGCCAGTGCCGCC</u><br><u>ACCGCTCAACGAGCTGCCCGGC</u>                                                                                                                                | putative Tn3 family<br>ISSod9-like transposase                             |
| 1510 | <i>sav_525</i>  | <u>GCCGAGCAGGC</u><br><u>ACCGCCAGCAAACGCACAGCC</u>                                                                                                                                                                                                                                         | putative IS630 family<br>ISXo7-like transposase                            |
| 1511 | <i>sav_634</i>  | <u>GCCGCTTCGGGCGGTGCCGCC</u><br><u>GCCGATGCAGCCGCC</u><br><u>ACCGCGGGGCAGCC</u><br><u>GCCGCGTGCAGGGCGGCACCGCC</u>                                                                                                                                                                          | putative IS110 family<br>ISLxx2-like transposase                           |
| 1512 | <i>sav_682</i>  | <u>GCCGATCGGC</u><br><u>GCCGCGCTTGCCGCCGATCGGC</u><br><u>GCCGCGTTCGGC</u>                                                                                                                                                                                                                  | putative IS5 family<br>ISBce20-like transposase                            |
| 1513 | <i>sav_713</i>  | <u>ACCGAGGCCCGC</u>                                                                                                                                                                                                                                                                        | putative IS5 family IS112-like<br>transposase                              |
| 1514 | <i>sav_720</i>  | <u>GCCGCGCAGCGATGCTGTTGTCGCC</u>                                                                                                                                                                                                                                                           | putative IS5 family IS1648-like<br>transposase                             |
| 1515 | <i>sav_745</i>  | <u>GCCGAGGGGGCCCGCC</u><br><u>GCCGCATGGCGGGCCCCCTCGGC</u>                                                                                                                                                                                                                                  | putative IS630 family<br>IS885-like transposase                            |
| 1516 | <i>sav_884</i>  | <u>GCCGCCACAAAAGGCTCGCC</u>                                                                                                                                                                                                                                                                | putative IS481 family<br>ISAni1-like transposase                           |
| 1517 | <i>sav_1198</i> | <u>GCCGCGCGGTTCCGACCCGCC</u><br><u>GCCGCGCGGTTGTGGCCGCC</u><br><u>GCCGCTCCGACCCGCC</u><br><u>GCCGCGCGATTCCGACCGCC</u><br><u>ACCGCCGCGCGGTTGTGGCCGCC</u><br><u>GCCGCGCCGTTCCGGCCCGCC</u><br><u>GCCGCGCGGTTGTGGCCGGCCGGC</u><br><u>ACCGCATAGGTTCCGCCGGTTCGGC</u><br><u>ACCGCGAGCCGGCCGGC</u> | putative IS607 family<br>ISTvo1-like transposase                           |

|      |                 |                                  |                                 |
|------|-----------------|----------------------------------|---------------------------------|
|      |                 | <u>ACCGCCGACCCGGC</u>            |                                 |
| 1518 | <i>sav_1204</i> | <u>ACCGCATAGGTTCCGCCGGTTCGGC</u> | putative IS630 family           |
|      |                 | <u>ACCGCCGACCCGGC</u>            | ISPsy1-like transposase         |
| 1519 | <i>sav_1969</i> | <u>GCCGCATGGATCACCGCC</u>        | putative IS110 family           |
|      |                 | <u>GCCGCTGAAACGTCGCCGCC</u>      | ISLxx2-like transposase         |
|      |                 | <u>GCCGAGCTCACCAGCCTGCTCGCC</u>  |                                 |
| 1520 | <i>sav_2607</i> | <u>GCCGCGGCCGGC</u>              | putative ISNCY family           |
|      |                 | <u>GCCGCCACATCGAAACCGCC</u>      | ISMk1-like transposase          |
|      |                 | <u>ACCGAACGGCCCGGC</u>           |                                 |
| 1521 | <i>sav_3722</i> | <u>GCCGCATCTCGTGAACCTTGGC</u>    | putative IS701 family           |
|      |                 | <u>GCCGCGTGAGGGCTGGC</u>         | ISAzvi8-like transposase        |
| 1522 | <i>sav_3741</i> | <u>GCCGACCGCC</u>                | putative IS481 family           |
|      |                 | <u>ACCGCTTGCCCTCGGCTTGGC</u>     | ISMav2-like transposase         |
|      |                 | <u>GCCGCGCTCTCAGCAGTCAGCC</u>    |                                 |
| 1523 | <i>sav_4216</i> | <u>ACCGACCGGC</u>                | putative IS5 family IS1647-like |
|      |                 | <u>GCCGCCGACTCCACCGCC</u>        | transposase                     |
|      |                 | <u>GCCGCAGCCCTCATCTGCC</u>       |                                 |
|      |                 | <u>GCCGCGCTGCTCGCGCTGCC</u>      |                                 |
|      |                 | <u>GCCGAGCCGCTTTGGCCCGGC</u>     |                                 |
| 1524 | <i>sav_5685</i> | <u>GCCGCACCGCC</u>               | putative IS4 family ISMg3-like  |
|      |                 |                                  | transposase                     |
| 1525 | <i>sav_7512</i> | <u>ACCGCCCACCGACCGGTGTCAGCC</u>  | putative IS110 family           |
|      |                 |                                  | ISLxx2-like transposase         |
| 1526 | <i>sav_7513</i> | <u>ACCGCAAACCACAGCC</u>          | putative IS630 family           |
|      |                 |                                  | ISPsy1-like transposase         |
| 1527 | <i>sav_7545</i> | <u>ACCGAGCAGCAGGACCAGCC</u>      | putative ISL3 family            |
|      |                 | <u>ACCGACGAAGACGCTTGTCGGC</u>    | ISFsp1-like transposase         |
| 1528 | <i>sav_7547</i> | <u>GCCGCCCTGGTCCACTTTTCAGGC</u>  | putative IS21 family            |
|      |                 |                                  | ISMt3-like transposase          |
| 1529 | <i>sav_7548</i> | <u>GCCGACAGACGCTGGC</u>          | putative ISL3 family            |
|      |                 |                                  | ISFsp1-like transposase         |
| 1530 | <i>sav_7558</i> | <u>GCCGCCCTCAGCC</u>             | putative IS5 family IS493-like  |
|      |                 |                                  | transposase                     |
| 1531 | <i>sav_7570</i> | <u>ACCGCGCAAAGCAGTACCTGGC</u>    | putative IS630 family           |
|      |                 | <u>ACCGAGCACCGCCTCCAGCC</u>      | IS885-like transposase          |

**Unknown or unclassified genes (1747)**

Not listed in this table

**Total genes: 3278**

Underlining: conserved 5-nt inverted repeats.

Red-font numbers: SAV742 targets confirmed by EMSAs.

Shaded numbers: putative targets confirmed by EMSAs as not bound by SAV742.

**Table S2. Strains and plasmids used in this study**

| Strain or plasmid     | Description                                                                                             | Source or reference |
|-----------------------|---------------------------------------------------------------------------------------------------------|---------------------|
| Strains               |                                                                                                         |                     |
| <i>S. avermitilis</i> |                                                                                                         |                     |
| ATCC31267             | Wild-type strain (WT)                                                                                   | Laboratory stock    |
| D742                  | <i>sav_742</i> deletion mutant                                                                          | This study          |
| C742                  | <i>sav_742</i> complemented strain                                                                      | This study          |
| O742                  | <i>sav_742</i> overexpression strain                                                                    | This study          |
| WT/pKC1139            | WT strain carrying empty vector pKC1139                                                                 | This study          |
| WT/pSET152            | WT strain carrying empty vector pSET152                                                                 | This study          |
| <i>E. coli</i>        |                                                                                                         |                     |
| JM109                 | General cloning host for plasmid manipulation                                                           | Laboratory stock    |
| ET12567               | Methylation-deficient strain                                                                            | <sup>1</sup>        |
| BL21 (DE3)            | Host for protein overexpression                                                                         | Novagen             |
| Plasmids              |                                                                                                         |                     |
| pKC1139               | Multiple-copy, temperature-sensitive <i>E. coli-Streptomyces</i> shuttle vector                         | <sup>2</sup>        |
| pSET152               | Integrative <i>E. coli-Streptomyces</i> shuttle vector                                                  | <sup>2</sup>        |
| pET-28a (+)           | Vector for His <sub>6</sub> -tagged protein overexpression in <i>E. coli</i>                            | Novagen             |
| pJL117                | pIJ2925 derivative carrying the <i>Streptomyces</i> strong constitutive promoter <i>ermE</i> * <i>p</i> | <sup>3</sup>        |
| pJL117-742            | pJL117 carrying <i>sav_742</i> ORF                                                                      | This study          |
| pKCD742               | <i>sav_742</i> deletion vector based on pKC1139                                                         | This study          |
| pSET152-742           | <i>sav_742</i> complemented vector based on pSET152                                                     | This study          |
| pKC1139-erm-742       | <i>sav_742</i> overexpression vector based on pKC1139                                                   | This study          |
| pET-742               | <i>sav_742</i> overexpression vector based on pET-28a (+)                                               | This study          |



**Table S3. Primers used in this study.**

| Primer purpose and primer                           | DNA sequence* (5'-3')                                   | Use                                                   |
|-----------------------------------------------------|---------------------------------------------------------|-------------------------------------------------------|
| Gene disruption, complementation and overexpression |                                                         |                                                       |
| SD4A                                                | CCCAAGCTTCAGATCGGCGAACACCTC ( <i>Hind</i> III)          | Deletion of <i>sav_742</i> gene                       |
| SD4B                                                | CTAGTCTAGATTCCCACCAATAGTCGAACC ( <i>Xba</i> I)          |                                                       |
| SD5A                                                | CTAGTCTAGAGCTGTACGTGCCGGAGTAG ( <i>Xba</i> I)           |                                                       |
| SD5B                                                | CCGGAATTCGAGCTGATCTGCCTGGACTT ( <i>Eco</i> RI)          |                                                       |
| SD24A                                               | ATCGGAACCGACGACAAC                                      | Confirmation of <i>sav_742</i> deletion in D742       |
| SD24B                                               | GCGGTTGTGATGTGATGAGT                                    |                                                       |
| SD35A                                               | CCCGAGACGTACCACCTGA                                     |                                                       |
| SD35B                                               | AGGTAGCTGAGGGATATGTGA                                   |                                                       |
| SD22D                                               | TGCTCTAGACACTCGTTTCGCAACACAC ( <i>Xba</i> I)            | Complementation of D742                               |
| SD22B                                               | CCCAAGCTTTGACCTGTTACCCAGCGAT ( <i>Hind</i> III)         |                                                       |
| SD22C                                               | TGCTCTAGATCCGCGTGGAAGGATCTC ( <i>Xba</i> I)             | Overexpression of                                     |
| SD22B                                               | CCCAAGCTTTGACCTGTTACCCAGCGAT ( <i>Hind</i> III)         | <i>sav_742</i> in <i>S. avermitilis</i>               |
| SD22A                                               | CGCGGATCCATGAACGGAATGATCGGGAGC ( <i>Bam</i> HI)         | Overexpression of His <sub>6</sub> -SAV742 protein in |
| SD22B                                               | CCCAAGCTTTGACCTGTTACCCAGCGAT ( <i>Hind</i> III)         | <i>E. coli</i>                                        |
| 5'-RACE                                             |                                                         |                                                       |
| Oligo (dT) anchor primer                            | GACCACGCGTATCGATGCGCACTTTTTTTTTTTTTTTT<br>TTv           |                                                       |
| Anchor primer                                       | GACCACGCGTATCGATGTCGAC                                  |                                                       |
| SD165A                                              | CTTCCAGAACGGCGAGCCTG                                    | Identification of TSS of <i>sav_742</i>               |
| SD165B                                              | TCGGACGGCTGGAGAGTG                                      |                                                       |
| SD165D                                              | CAGAGCACCGAGGCCCTC                                      |                                                       |
| DNase I footprinting assay                          |                                                         |                                                       |
| FAM-SD169A                                          | GTGTCCCGCCTGCTCTCC                                      | <i>sav_742</i> promoter region                        |
| SD169C                                              | GCCGATCAGTCCCACCAATAG                                   |                                                       |
| EMSA                                                |                                                         |                                                       |
| SD73A                                               | TGCTCACCACCAACTGACC                                     | Probe <i>sav_742p</i>                                 |
| SD73B                                               | CCCGATCATCCGTTTCATC                                     |                                                       |
| SD144A                                              | GGCATCGCCTTCTTCAAGTA                                    | Probe I                                               |
| SD144B                                              | CGCAGATCGTTCTTCCAGTC                                    |                                                       |
| SD171A                                              | CGGCCGAACGAAAATCGCTCGGCCGGCCG<br>AGCGGACGCACTCGGCTTGC   | Probe P1                                              |
| SD171B                                              | GCAAGCCGAGTGCGTCCGCTCGGCCGGCCG<br>AGCGATTTTTCGTTCCGGCCG |                                                       |
| SD178A                                              | CGTCTAGACGAAAATCGCCATGGCGAGAT<br>CTCGGACGCACATATGTTGC   | Probe P1m                                             |
| SD178B                                              | GCAACATATGTGCGTCCGAGATCTCGCCAT<br>GGCGATTTTTCGTTCCAGTC  |                                                       |
| aveA1p-Fw                                           | ATGGTCCGGGAACCTCCGCAA                                   | Probe <i>aveA1_aveD_int</i>                           |

|            |                         |                             |
|------------|-------------------------|-----------------------------|
| aveA1p-Rev | CTGTGTCCTCACCGCTAGGC    |                             |
| SD111A     | CGACAAGAGAAATCGGAAATT   | Probe <i>aveA4_orf1_int</i> |
| SD111B     | GCCTGCACCTGTGACAAG      |                             |
| aveFp-Fw   | GCAGCGTCGCGTGAAGTC      | Probe <i>aveFp</i>          |
| aveFp-Rev  | GCCCCAGGCAGAACGGAC      |                             |
| aveRp-Fw   | CCGCACCGCCATACATAC      | Probe <i>aveRp</i>          |
| aveRp-Rev  | GAAACTCCCTGCATGATGTTT   |                             |
| SD74A      | CGCAAGATCTATGTCGACCTCAC | Probe <i>sig8p</i>          |
| SD74B      | CTCTTGTGCTCGGTCACTGT    |                             |
| ZJY19      | GCCACACGCACCTCCG        | Probe <i>avaR1p</i>         |
| ZJY20      | GGGAGTTGGGGGTGAGATATGTG |                             |
| SD208A     | AGCCATACGACTCTTCTCTGTG  | Probe <i>sig25_smrA_int</i> |
| SD208B     | GGTATCCCTGCGGTCTTG      |                             |
| olmR1p-Fw  | CCGCACCTCCCGACCTG       | Probe <i>olmR1p</i>         |
| olmR1p-Rev | GACCTCGCCCAATCAGCACC    |                             |
| SD327A     | GGTTCTACGGGGTCAAGGAG    | Probe <i>olmA1p</i>         |
| SD327B     | CTATCGGCTGAATGGATCGC    |                             |
| SD182A     | GGCCTGGTGAATTCCTGC      | Probe <i>olmA4p</i>         |
| SD182B     | GAAGGTACGGACGGCTCG      |                             |
| SD186A     | CCTGGAGCGGTGAGGGCA      | Probe <i>melC1p</i>         |
| SD186B     | GCGGGTGAATTTCGGGCAT     |                             |
| SD187A     | CCTCAACCACCAGCGAAAC     | Probe <i>melC1-2p</i>       |
| SD187B     | CCCCAGCGGAACAGCAC       |                             |
| SD320A     | GGTCTCACACCGTCTCTA      | Probe <i>pteF_pteR_int</i>  |
| SD320B     | GGTATCGCCAGATGTTGAA     |                             |
| SD321A     | TCCCGACTGTCAATGCTC      | Probe <i>pteA1p</i>         |
| SD321B     | AGAGAACGAAAGGCACCG      |                             |
| SD322A     | GGCCTTGTCTGAACGCATTC    | Probe <i>crtUp</i>          |
| SD322B     | CGCCTTGTTCGGAAGCATT     |                             |
| SD323A     | CATCACCCACACCGTCTGT     | Probe <i>crtY_crtE_int</i>  |
| SD323B     | GGTCGTGCTCCGTTGAAC      |                             |
| SD243A     | GTCCTAAACGAGCCATCTACC   | Probe <i>pks1-3p</i>        |
| SD243B     | GCATCGGATTCCTGTGTG      |                             |
| SD318A     | ACACCCATGCTTTGTCCGAG    | Probe <i>pks3-2p</i>        |
| SD318B     | CCGGTTGTAGGTGAGGATGG    |                             |
| SD211A     | CCTCGCCGTTGATCTCACC     | Probe <i>amfCp</i>          |
| SD211B     | CCCTCGACCGGATTGTGG      |                             |
| SD210A     | CCGATGGCTGTAGGCGTTTAT   | Probe <i>whiBp</i>          |
| SD210B     | CCCTCGTCTGTCTTCGCG      |                             |
| SD194A     | GAGCCCCACGATGAAAAC      | Probe <i>ssgCp</i>          |
| SD194B     | CGACCATCCGGTGACTG       |                             |
| SD221A     | CATCGCGCAGGGAAACGG      | Probe <i>amfRp</i>          |
| SD221B     | CGGGGTAAAGGGGTCTC       |                             |
| SD115A     | GCCCCGTTCTCGTAAGAC      | Probe <i>ftsHp</i>          |

|        |                         |                     |
|--------|-------------------------|---------------------|
| SD115B | CAGCACGATCCACATGAC      |                     |
| SD218A | GCACTGCTACGGCTGATC      | Probe <i>ftsZp</i>  |
| SD218B | TCGCCTCGAGTTACGTGT      |                     |
| SD276A | CATTGGCCGTAGTCCACAC     | Probe <i>aceE1p</i> |
| SD276B | ATCGAGACGTCCGTACAGAC    |                     |
| SD277A | TCAGGACTCGTACGGAACAC    | Probe <i>acnAp</i>  |
| SD277B | GGTCACCCTTACCAAGCTG     |                     |
| SD278A | GTCCATTGAGCACCAGAACC    | Probe <i>korAp</i>  |
| SD278B | CCTGTTCCGTTGTACTGCTG    |                     |
| SD279A | TTGGTCCTCGCGCTGTAC      | Probe <i>icdAp</i>  |
| SD279B | ATCTCGTGATGGGGTCCC      |                     |
| SD284A | CCCAACGCTGGTCTACT       | Probe <i>pgmAp</i>  |
| SD284B | GACAGTTCGGCTTCATCG      |                     |
| SD283A | GGCAGTTGGTGTCTGTAA      | Probe <i>gap2p</i>  |
| SD283B | CCTACCTCCCTGAAGCCC      |                     |
| SD285A | CCCCTTTGTATCTTCCACCAGA  | Probe <i>pykA1p</i> |
| SD285B | GGGCCACGTTTCATGCCGG     |                     |
| SD196A | CGGGACCTACATATGCAAG     | Probe <i>dasRp</i>  |
| SD196B | CGGTAGTACTTGGGCACAC     |                     |
| SD293A | AGACCTTGACCACATCGG      | Probe <i>accA3p</i> |
| SD293B | ATGACTCCCTCTCCTTGAAAC   |                     |
| SD226A | CCCGGCGGTCTGTTCCCTC     | Probe <i>accD4p</i> |
| SD226B | TCCTGCTCGAGATCCTGCTGAG  |                     |
| SD290A | CCACTCGCCCCGTCTGAT      | Probe <i>fadD5</i>  |
| SD290B | CTGCTCCTTCGTCCGCCT      |                     |
| SD291A | ATGGTGGGTCCAGATTTCTCTAC | Probe <i>fadA6</i>  |
| SD291B | GAGCAGTTCGACGGGGTG      |                     |
| SD292A | CCTTGTGGTTCGTGGCTT      | Probe <i>pcaF1</i>  |
| SD292B | CGACCTGACTCCTGACCG      |                     |
| SD274A | CGGTCCCGCATACTGATACG    | Probe <i>leuA2p</i> |
| SD274B | CGGTACTTGTGGATCGGCAT    |                     |
| SD281A | GCCGCTACTGTTGTCCAT      | Probe <i>leuCp</i>  |
| SD281B | TCGTCCCAGACCTTCTCC      |                     |
| SD280A | GCCCTCCGCTCACATAAT      | Probe <i>ilvB1p</i> |
| SD280B | GTGTTGAACTGGTGCCTGT     |                     |
| SD272A | GAGGCCATGCTCAAGATGC     | Probe <i>ilvCp</i>  |
| SD272B | TGGGTTCTCTCCTTGGTGTG    |                     |
| SD273A | CGGAACAGATCATCGCCAG     | Probe <i>ilvD1p</i> |
| SD273B | GCGGTGCCTACGTCTCGG      |                     |
| SD275A | GTACGAGTAGCAGGCTGACC    | Probe <i>ilvEp</i>  |
| SD275B | CTGTGAACGGTGTGCGTG      |                     |
| SD179A | GGCGGCCATTACGGATAC      | Probe <i>glnA1p</i> |
| SD179B | CCACCACAACACCATTTTCG    |                     |
| SD288A | CAGGACGACATGGACCCC      | Probe <i>ndh1p</i>  |

|             |                        |                     |
|-------------|------------------------|---------------------|
| SD288B      | GTCACCCAAACCCGACGG     |                     |
| SD286A      | GGTTCGGTATGCGTTGCG     | Probe <i>ctaD2p</i> |
| SD286B      | ATGCGGTGTCTGCTTCGG     |                     |
| qRT-PCR     |                        |                     |
| 16S-QP-Fw   | AGCGGAGCATGTGGCTTAAT   | <i>16S rRNA</i> ORF |
| 16S-QP-Rev  | ACGTATTCACCGCAGCAATG   |                     |
| SD66A       | GGGGATCGGGGATGAAC      | <i>sav_742</i> ORF  |
| SD66B       | ACCAATAGTCGAACCGGTTG   |                     |
| SD65A       | TTGTCCCGGCTGTTCTTC     | <i>sig8</i> ORF     |
| SD65B       | GACGAGGGTGACGTTTCATCT  |                     |
| GJ99        | CGGACAGGACTACGCACTTC   | <i>aveA1</i> ORF    |
| GJ100       | ACGAGATACGACCGGAGATC   |                     |
| aveD-QP-Fw  | GGACTACTACGACCGTTTGACC | <i>aveD</i> ORF     |
| aveD-QP-Rev | CTCAGCTTGCCGATGAGGAG   |                     |
| SD161A      | TGGAGGTGTCCTGGGAGG     | <i>aveA4</i> ORF    |
| SD161B      | ACCGAGAGCAGACGGGTC     |                     |
| SD120A      | GGACCTGCTGGTGAACAAC    | <i>orf1</i> ORF     |
| SD120B      | CGGCAACCATGAATGACAC    |                     |
| aveF-QP-Fw  | CCGCCACCGACATGAACC     | <i>aveF</i> ORF     |
| aveF-QP-Rev | GGTGACCCAACGGCCTTC     |                     |
| GJ97        | CAGAAGAACTCACGCTCGTC   | <i>aveR</i> ORF     |
| GJ98        | ACTCTTTCCACAGCCCATTC   |                     |
| ZJY62       | ATCCGATCGTCCAGGGCAG    | <i>avaR1</i> ORF    |
| ZJY63       | GAAGAGGGACTGCGTGTGC    |                     |
| LS28        | CTGCAGAGCGCGCTGTTC     | <i>sig25</i> ORF    |
| LS29        | GGTTGGTCATGGTGCGACG    |                     |
| LS30        | ACTATGTCGTGAAGCCCGTG   | <i>smrA</i> ORF     |
| LS31        | TCCTCGCCGTTCTTGGTGA    |                     |
| SD324A      | GAGTTCTTCGGCGTCTCC     | <i>olmA4</i> ORF    |
| SD324B      | GGTGTTCCTCCAGGGCTTC    |                     |
| SD325A      | CACTCTCTTGCTGATTCCG    | <i>pteF</i> ORF     |
| SD325B      | CCGTTGAACTGCCTGAAG     |                     |
| SD326A      | TGCCCACCGAACTACTTGTC   | <i>pteR</i> ORF     |
| SD326B      | GCACCGAAATTTGGCCTGTT   |                     |
| SD250A      | CGTGCTCGACCTCACCTC     | <i>pks1-3</i> ORF   |
| SD250B      | CGGGAAAGGCATCGTTGT     |                     |
| SD305A      | CGAGGTGTACGACGACTTCC   | <i>pks3-2</i> ORF   |
| SD305B      | TGACGTTGGAGATCAGGCTG   |                     |
| SD219A      | GCCGACCTCAGCTATGTG     | <i>amfC</i> ORF     |
| SD219B      | GAAAGCCGCTCCATGAC      |                     |
| SD203A      | GACAGCGGCAGTGACAAG     | <i>whiB</i> ORF     |
| SD203B      | TTGGCAGCCTCGAACTTC     |                     |
| SD199A      | GTGGCATGTTCGATTTCCG    | <i>ssgC</i> ORF     |
| SD199B      | GGGTACAGGCAGTGAGGACTC  |                     |

|        |                        |                  |
|--------|------------------------|------------------|
| SD309A | GGAGTTCCCGACCGTCTC     | <i>aceE1</i> ORF |
| SD309B | CGTGCGACTTGGAGGTGT     |                  |
| SD310A | AGCCTGAAGGTGCTGCTG     | <i>acnA</i> ORF  |
| SD310B | GAGTCCCAGTTGCCGATG     |                  |
| SD311A | TCACCTCAGAGACGGCGT     | <i>korA</i> ORF  |
| SD311B | GGGTCAGGATGTCGTGGT     |                  |
| SD318A | ACACCCATGCTTTGTCCGAG   | <i>pgmA</i> ORF  |
| SD318B | CCGGTTGTAGGTGAGGATGG   |                  |
| SD200A | ATGAGCACCGACGTCAGC     | <i>dasR</i> ORF  |
| SD200B | GCAGCGTCTCCGTCATGT     |                  |
| SD249A | CTTCGGCATGGAGAACAACC   | <i>accD4</i> ORF |
| SD249B | AAGTCCTGCGAGAACACGG    |                  |
| SD316A | GGTGTGCGAGTCCATGAGCC   | <i>fadA6</i> ORF |
| SD316B | ACTTGGCGGCGATCAGTTC    |                  |
| SD317A | AGAACGGGTACTTCGACGAC   | <i>pcaF1</i> ORF |
| SD317B | CTTGAGACGGGACAGCTTCT   |                  |
| SD306A | GGGCTACAAGGAGATCGAGG   | <i>leuA2</i> ORF |
| SD306B | CGGAGATCGTGACGTCGTC    |                  |
| SD308A | ATGGGTAGGACACTCGCGG    | <i>leuC</i> ORF  |
| SD308B | ATGAAGAGGAGGTCCGGGCT   |                  |
| SD307A | CGGAGACGGTATTCGGTATC   | <i>ilvB1</i> ORF |
| SD307B | GCGCTTCGAGTCCATCAG     |                  |
| SD313A | CCGACCTGTCCATCATCCAG   | <i>ilvC</i> ORF  |
| SD313B | CCCGAGTCACGCAGCGAC     |                  |
| SD188A | GGACAAGCAGCAGGAGTTC    | <i>glnA1</i> ORF |
| SD188B | TTGAGGAAGCCGAGTACG     |                  |
| SD315A | AGTTGGGTCTGGTGCGGT     | <i>ndh1</i> ORF  |
| SD315B | AGTGGTGGCGAGCCTCTC     |                  |
| SD312A | CCTCTATCTGATCACGTCGTTT | <i>ctaD2</i> ORF |
| SD312B | GTTGTCCACGATCTGCATG    |                  |

---

\* Underlining: restriction endonuclease site; corresponding enzyme is shown in parentheses at the end of the sequence.

## References

- 1 Macneil, D. J. & Klapko, L. M. Transformation of *Streptomyces avermitilis* by plasmid DNA. *J Ind Microbiol Biotechnol* **2**, 209-218 (1987).
- 2 Bierman, M. *et al.* Plasmid cloning vectors for the conjugal transfer of DNA from *Escherichia coli* to *Streptomyces* spp. *Gene* **116**, 43-49 (1992).
- 3 Li, L. *et al.* Overexpression of ribosome recycling factor causes increased production of avermectin in *Streptomyces avermitilis* strains. *J Ind Microbiol Biotechnol* **37**, 673-679 (2010).
